# Supplementary material
Source: ML conference proceedings conference paper supplement (https://openaccess.thecvf.com/content/ICCV2021/html/Song_Stacked_Homography_Transformations_ICCV_2021_paper.html)
Supplement: Supplementary file 2 [file Song_Stacked_Homography_Transformations_ICCV_2021_supplemental.zip]

Archive with 133 entries (116 files):
- code/grid_visualize.py
- code/homo_test/
- code/homo_test/extrinsic_matrices.npy
- code/homo_test/homo_test_release.ipynb
- code/homo_test/intrinsic_matrices.npy
- code/homo_test/worldgrid2worldcoord_mat.npy
- code/img_grid_visualize.png
- code/main.py
- code/main_sep.py
- code/map_grid_visualize.png
- code/multiview_detector/
- code/multiview_detector/__init__.py
- code/multiview_detector/d_trainer.py
- code/multiview_detector/datasets/
- code/multiview_detector/datasets/__init__.py
- code/multiview_detector/datasets/frameDataset.py
- code/multiview_detector/datasets/MultiviewX.py
- code/multiview_detector/datasets/Wildtrack.py
- code/multiview_detector/evaluation/
- code/multiview_detector/evaluation/evaluate.py
- code/multiview_detector/evaluation/motchallenge-devkit/
- code/multiview_detector/evaluation/motchallenge-devkit/.gitignore
- code/multiview_detector/evaluation/motchallenge-devkit/eval_demo.m
- code/multiview_detector/evaluation/motchallenge-devkit/evaluateDetection.m
- code/multiview_detector/evaluation/motchallenge-devkit/gt.txt
- code/multiview_detector/evaluation/motchallenge-devkit/README.md
- code/multiview_detector/evaluation/motchallenge-devkit/test.txt
- code/multiview_detector/evaluation/motchallenge-devkit/utils/
- code/multiview_detector/evaluation/motchallenge-devkit/utils/boxIntersect.m
- code/multiview_detector/evaluation/motchallenge-devkit/utils/boxiou.m
- code/multiview_detector/evaluation/motchallenge-devkit/utils/boxUnion.m
- code/multiview_detector/evaluation/motchallenge-devkit/utils/camera/
- code/multiview_detector/evaluation/motchallenge-devkit/utils/camera/calib_towncentre.m
- code/multiview_detector/evaluation/motchallenge-devkit/utils/camera/distortedToUndistortedImageCoord.m
- code/multiview_detector/evaluation/motchallenge-devkit/utils/camera/distortedToUndistortedSensorCoord.m
- code/multiview_detector/evaluation/motchallenge-devkit/utils/camera/getRotTrans.m
- code/multiview_detector/evaluation/motchallenge-devkit/utils/camera/imageToWorld.m
- code/multiview_detector/evaluation/motchallenge-devkit/utils/camera/parseCameraParameters.m
- code/multiview_detector/evaluation/motchallenge-devkit/utils/camera/README.md
- code/multiview_detector/evaluation/motchallenge-devkit/utils/camera/undistortedToDistortedImageCoord.m
- code/multiview_detector/evaluation/motchallenge-devkit/utils/camera/undistortedToDistortedSensorCoord.m
- code/multiview_detector/evaluation/motchallenge-devkit/utils/camera/worldToImage.m
- code/multiview_detector/evaluation/motchallenge-devkit/utils/classIDToString.m
- code/multiview_detector/evaluation/motchallenge-devkit/utils/classStringToID.m
- code/multiview_detector/evaluation/motchallenge-devkit/utils/cleanRequired.m
- code/multiview_detector/evaluation/motchallenge-devkit/utils/CLEAR_MOD_HUN.m
- code/multiview_detector/evaluation/motchallenge-devkit/utils/CLEAR_MOT_HUN.m
- code/multiview_detector/evaluation/motchallenge-devkit/utils/clearMOTLoopMatlab.m
- code/multiview_detector/evaluation/motchallenge-devkit/utils/clearMOTMex.cpp
- code/multiview_detector/evaluation/motchallenge-devkit/utils/convertMatToStruct.m
- code/multiview_detector/evaluation/motchallenge-devkit/utils/convertTXTToStruct.m
- code/multiview_detector/evaluation/motchallenge-devkit/utils/costBlockMex.cpp
- code/multiview_detector/evaluation/motchallenge-devkit/utils/costFunction.m
- code/multiview_detector/evaluation/motchallenge-devkit/utils/evaluateBenchmark.m
- code/multiview_detector/evaluation/motchallenge-devkit/utils/evaluateMultiCam.m
- code/multiview_detector/evaluation/motchallenge-devkit/utils/external/
- code/multiview_detector/evaluation/motchallenge-devkit/utils/external/dollar/
- code/multiview_detector/evaluation/motchallenge-devkit/utils/external/dollar/toolbox/
- code/multiview_detector/evaluation/motchallenge-devkit/utils/external/dollar/toolbox/detector/
- code/multiview_detector/evaluation/motchallenge-devkit/utils/external/dollar/toolbox/detector/acfDemoCal.m
- code/multiview_detector/evaluation/motchallenge-devkit/utils/external/dollar/toolbox/detector/acfDemoInria.m
- code/multiview_detector/evaluation/motchallenge-devkit/utils/external/dollar/toolbox/detector/acfDetect.m
- code/multiview_detector/evaluation/motchallenge-devkit/utils/external/dollar/toolbox/detector/acfDetect1.mexa64
- code/multiview_detector/evaluation/motchallenge-devkit/utils/external/dollar/toolbox/detector/acfModify.m
- code/multiview_detector/evaluation/motchallenge-devkit/utils/external/dollar/toolbox/detector/acfTest.m
- code/multiview_detector/evaluation/motchallenge-devkit/utils/external/dollar/toolbox/detector/acfTrain.m
- code/multiview_detector/evaluation/motchallenge-devkit/utils/external/dollar/toolbox/detector/bbApply.m
- code/multiview_detector/evaluation/motchallenge-devkit/utils/external/dollar/toolbox/detector/bbGt.m
- code/multiview_detector/evaluation/motchallenge-devkit/utils/external/dollar/toolbox/detector/bbLabeler.m
- code/multiview_detector/evaluation/motchallenge-devkit/utils/external/dollar/toolbox/detector/bbNms.m
- code/multiview_detector/evaluation/motchallenge-devkit/utils/external/dollar/toolbox/detector/Contents.m
- code/multiview_detector/evaluation/motchallenge-devkit/utils/external/dollar/toolbox/detector/detectPeople.m
- code/multiview_detector/evaluation/motchallenge-devkit/utils/external/dollar/toolbox/detector/evalDetections.m
- code/multiview_detector/evaluation/motchallenge-devkit/utils/external/dollar/toolbox/detector/models/
- code/multiview_detector/evaluation/motchallenge-devkit/utils/external/dollar/toolbox/detector/models/AcfCaltechDetector.mat
- code/multiview_detector/evaluation/motchallenge-devkit/utils/external/dollar/toolbox/detector/models/AcfCaltechLog.txt
- code/multiview_detector/evaluation/motchallenge-devkit/utils/external/dollar/toolbox/detector/models/AcfCaltechRoc.png
- code/multiview_detector/evaluation/motchallenge-devkit/utils/external/dollar/toolbox/detector/models/AcfInriaDetector.mat
- code/multiview_detector/evaluation/motchallenge-devkit/utils/external/dollar/toolbox/detector/models/AcfInriaLog.txt
- code/multiview_detector/evaluation/motchallenge-devkit/utils/external/dollar/toolbox/detector/models/AcfInriaRoc.png
- code/multiview_detector/evaluation/motchallenge-devkit/utils/external/dollar/toolbox/detector/private/
- code/multiview_detector/evaluation/motchallenge-devkit/utils/external/dollar/toolbox/detector/private/acfDetect1.cpp
- code/multiview_detector/evaluation/motchallenge-devkit/utils/external/dollar/toolbox/detector/private/acfDetect1.mexa64
- code/multiview_detector/evaluation/motchallenge-devkit/utils/external/dollar/toolbox/detector/private/acfDetect1.mexw64
- code/multiview_detector/evaluation/motchallenge-devkit/utils/external/dollar/toolbox/detector/writeDets.m
- code/multiview_detector/evaluation/motchallenge-devkit/utils/external/iniconfig/
- code/multiview_detector/evaluation/motchallenge-devkit/utils/external/iniconfig/IniConfig.m
- code/multiview_detector/evaluation/motchallenge-devkit/utils/external/iniconfig/license.txt
- code/multiview_detector/evaluation/motchallenge-devkit/utils/external/PrintTable.m
- code/multiview_detector/evaluation/motchallenge-devkit/utils/getClassLabels.m
- code/multiview_detector/evaluation/motchallenge-devkit/utils/getDistance.m
- code/multiview_detector/evaluation/motchallenge-devkit/utils/getImgExt.m
- code/multiview_detector/evaluation/motchallenge-devkit/utils/getROIs.m
- code/multiview_detector/evaluation/motchallenge-devkit/utils/getSeqInfoFromFile.m
- code/multiview_detector/evaluation/motchallenge-devkit/utils/Hungarian.m
- code/multiview_detector/evaluation/motchallenge-devkit/utils/IDmeasures.m
- code/multiview_detector/evaluation/motchallenge-devkit/utils/ismember_mex.c
- code/multiview_detector/evaluation/motchallenge-devkit/utils/MinCostMatching.cpp
- code/multiview_detector/evaluation/motchallenge-devkit/utils/parseSequences2.m
- code/multiview_detector/evaluation/motchallenge-devkit/utils/preprocessResult.m
- code/multiview_detector/evaluation/motchallenge-devkit/utils/printMetrics.m
- code/multiview_detector/evaluation/motchallenge-devkit/utils/printMetricsDet.m
- code/multiview_detector/evaluation/motchallenge-devkit/utils/printMetricsExt.m
- code/multiview_detector/evaluation/README.md
- code/multiview_detector/loss/
- code/multiview_detector/loss/gaussian_mse.py
- code/multiview_detector/models/
- code/multiview_detector/models/__init__.py
- code/multiview_detector/models/dpersp_trans_detector.py
- code/multiview_detector/models/dpersp_trans_detector_visualize.py
- code/multiview_detector/models/image_proj_variant.py
- code/multiview_detector/models/no_joint_conv_variant.py
- code/multiview_detector/models/persp_trans_detector copy.py
- code/multiview_detector/models/persp_trans_detector.py
- code/multiview_detector/models/res_proj_variant.py
- code/multiview_detector/models/resnet.py
- code/multiview_detector/models/sep_dpersp_trans_detector.py
- code/multiview_detector/models/sep_persp_trans_detector.py
- code/multiview_detector/sep_d_trainer.py
- code/multiview_detector/sep_trainer.py
- code/multiview_detector/trainer.py
- code/multiview_detector/utils/
- code/multiview_detector/utils/draw_curve.py
- code/multiview_detector/utils/image_utils.py
- code/multiview_detector/utils/logger.py
- code/multiview_detector/utils/meters.py
- code/multiview_detector/utils/nms.py
- code/multiview_detector/utils/projection.py
- code/README.md
- code/README-mvdet.md
- code/run_gpu01.sh
- code/video_visualize.py
- supplementary.pdf
