# Supplementary material
Source: ML conference proceedings conference paper supplement (https://openaccess.thecvf.com/content/ICCV2021/html/Song_Stacked_Homography_Transformations_ICCV_2021_paper.html)
Supplement: Supplementary file 2 [file Song_Stacked_Homography_Transformations_ICCV_2021_supplemental.zip › code/multiview_detector/datasets/__init__.py]

from .Wildtrack import Wildtrack
from .MultiviewX import MultiviewX
from .frameDataset import frameDataset
