# Supplementary material
Source: ML conference proceedings conference paper supplement (https://openaccess.thecvf.com/content/ICCV2021/html/Song_Stacked_Homography_Transformations_ICCV_2021_paper.html)
Supplement: Supplementary file 2 [file Song_Stacked_Homography_Transformations_ICCV_2021_supplemental.zip › code/multiview_detector/evaluation/evaluate.py]

import os
import numpy as np
import torch
import matlab.engine
# from multiview_detector.utils.nms import nms


def matlab_eval(res_fpath, gt_fpath, dataset='wildtrack'):
    eng = matlab.engine.start_matlab()
    eng.cd('multiview_detector/evaluation/motchallenge-devkit')
    res = eng.evaluateDetection(res_fpath, gt_fpath, dataset)
    recall, precision, moda, modp = np.array(res['detMets']).squeeze()[[0, 1, -2, -1]]
    return recall, precision, moda, modp


if __name__ == "__main__":
    res_fpath = 'test.txt'
    gt_fpath = 'multiview_detector/evaluation/motchallenge-devkit/gt.txt'

    # test nms
    # all_res_list = np.loadtxt(os.path.dirname(res_fpath) + '/all_res.txt')
    # res_list = []
    # for frame in np.unique(all_res_list[:, 0]):
    #     res = all_res_list[all_res_list[:, 0] == frame, :]
    #     positions, scores = torch.from_numpy(res[:, 1:3]).float(), torch.from_numpy(res[:, 3]).float()
    #     ids, count = nms(positions, scores, 20, np.inf)
    #     res_list.append(torch.cat([torch.ones([count, 1]) * frame, positions[ids[:count], :]], dim=1))
    # res_list = torch.cat(res_list, dim=0).numpy()
    # np.savetxt(res_fpath, res_list, '%d')

    # only consider cam1
    # from multiview_detector.utils.projection import get_imagecoord_from_worldcoord
    # from multiview_detector.datasets import Wildtrack
    #
    # dataset = Wildtrack(os.path.expanduser('~/Data/Wildtrack'))
    # world_grids = res_list[:, 1:3]
    # world_coords = dataset.get_worldcoord_from_worldgrid(world_grids.T)
    # image_coords = get_imagecoord_from_worldcoord(world_coords, dataset.intrinsic_matrices[0],
    #                                               dataset.extrinsic_matrices[0])
    # indices = np.logical_and(np.logical_and(image_coords[0, :] > 0, image_coords[0, :] < dataset.img_shape[0]),
    #                          np.logical_and(image_coords[1, :] > 0, image_coords[1, :] < dataset.img_shape[1]))
    # cam1_res_list = res_list[indices, :]
    # np.savetxt(res_fpath, cam1_res_list, '%d')

    matlab_eval(res_fpath, gt_fpath, 'Wildtrack')
