# Supplementary material
Source: ML conference proceedings conference paper supplement (https://openaccess.thecvf.com/content/ICCV2021/html/Song_Stacked_Homography_Transformations_ICCV_2021_paper.html)
Supplement: Supplementary file 2 [file Song_Stacked_Homography_Transformations_ICCV_2021_supplemental.zip › code/multiview_detector/evaluation/motchallenge-devkit/eval_demo.m]

res_fpath = 'test.txt';
gt_fpath = 'gt.txt';

evaluateDetection(res_fpath, gt_fpath, 'wildtrack');
