# Supplementary material
Source: ML conference proceedings conference paper supplement (https://openaccess.thecvf.com/content/ICCV2021/html/Song_Stacked_Homography_Transformations_ICCV_2021_paper.html)
Supplement: Supplementary file 2 [file Song_Stacked_Homography_Transformations_ICCV_2021_supplemental.zip › code/multiview_detector/evaluation/motchallenge-devkit/gt.txt]

0 346 951
0 240 934
0 258 961
0 2 479
0 32 271
0 29 609
0 455 779
0 88 1024
0 37 289
0 363 969
0 157 741
0 23 648
0 219 1015
0 479 227
0 429 890
0 38 974
0 371 897
0 265 1041
0 397 1030
0 384 322
0 35 796
0 40 345
0 393 358
0 8 331
0 230 674
0 333 935
0 271 672
0 159 1040
0 206 947
0 155 757
0 375 387
0 442 914
0 285 963
0 31 182
0 402 987
0 305 851
0 215 906
0 25 1014
5 267 637
5 413 900
5 0 457
5 276 968
5 29 609
5 88 1024
5 404 987
5 393 1031
5 268 1052
5 157 741
5 202 909
5 224 642
5 37 974
5 32 266
5 153 757
5 427 794
5 214 991
5 321 950
5 433 928
5 358 364
5 139 1073
5 363 970
5 229 951
5 378 340
5 34 796
5 24 1015
5 232 968
5 333 961
5 31 182
5 22 648
5 39 345
5 272 867
5 359 897
5 256 958
5 12 290
5 371 305
10 205 960
10 155 741
10 393 1031
10 258 1079
10 280 968
10 348 913
10 369 312
10 226 996
10 150 760
10 36 974
10 23 648
10 223 605
10 337 342
10 186 913
10 39 345
10 255 958
10 63 1046
10 31 266
10 8 411
10 254 888
10 29 610
10 30 182
10 323 961
10 34 796
10 256 610
10 405 908
10 363 970
10 24 1015
10 360 286
10 122 1102
10 405 823
10 425 947
10 403 988
10 321 958
15 403 988
15 386 830
15 23 1015
15 31 267
15 445 388
15 309 972
15 390 1036
15 23 649
15 479 833
15 319 319
15 153 766
15 362 970
15 298 1012
15 187 958
15 35 796
15 355 265
15 39 351
15 53 1069
15 150 744
15 394 925
15 340 923
15 217 580
15 36 975
15 347 301
15 458 831
15 29 611
15 264 996
15 104 1112
15 264 1094
15 186 933
15 214 1011
15 28 183
15 251 581
15 256 958
15 416 954
15 250 889
20 189 1044
20 389 1036
20 416 966
20 276 1109
20 41 351
20 426 362
20 229 903
20 369 854
20 342 248
20 467 855
20 158 994
20 35 797
20 36 976
20 391 944
20 22 1015
20 328 274
20 306 293
20 249 551
20 52 1069
20 154 766
20 86 1148
20 307 973
20 402 988
20 235 1003
20 217 549
20 23 649
20 30 267
20 363 970
20 323 927
20 153 744
20 444 831
20 28 611
20 27 183
20 157 1000
20 258 1009
20 287 1029
25 281 1050
25 229 1003
25 247 511
25 458 215
25 23 1015
25 300 988
25 414 974
25 294 267
25 281 1129
25 214 911
25 27 612
25 55 1105
25 314 936
25 79 1148
25 387 1036
25 40 352
25 35 797
25 35 976
25 173 1055
25 153 766
25 28 183
25 333 225
25 465 813
25 363 970
25 29 267
25 114 1040
25 475 286
25 257 1022
25 391 949
25 24 649
25 429 844
25 154 738
25 316 256
25 163 996
25 417 343
25 217 511
25 353 879
25 441 871
25 403 988
30 458 263
30 242 1046
30 408 861
30 414 974
30 283 250
30 227 1017
30 321 955
30 311 243
30 288 1145
30 282 1064
30 448 818
30 63 1113
30 343 910
30 397 318
30 23 1015
30 26 611
30 294 988
30 362 970
30 29 267
30 98 1079
30 42 352
30 215 480
30 247 480
30 332 221
30 387 1037
30 402 988
30 34 798
30 391 954
30 154 738
30 148 1075
30 183 955
30 34 976
30 152 766
30 449 185
30 24 650
30 421 892
30 29 183
30 160 1001
35 23 650
35 62 1114
35 275 1073
35 237 453
35 326 931
35 29 184
35 27 1015
35 407 909
35 385 1041
35 215 446
35 285 1163
35 321 960
35 242 1060
35 381 281
35 156 737
35 29 267
35 283 988
35 440 242
35 274 234
35 443 175
35 89 1112
35 124 1081
35 34 976
35 25 611
35 361 971
35 133 1098
35 381 954
35 415 974
35 33 358
35 152 766
35 33 798
35 391 866
35 174 955
35 203 1055
35 424 830
35 333 203
35 402 989
35 307 223
40 72 1112
40 389 909
40 479 856
40 386 1041
40 414 974
40 368 261
40 29 184
40 405 847
40 210 418
40 27 1015
40 434 220
40 27 267
40 282 1004
40 32 976
40 291 195
40 434 170
40 33 798
40 361 971
40 263 217
40 240 421
40 256 1110
40 136 993
40 239 1077
40 284 1175
40 24 611
40 375 887
40 380 954
40 315 175
40 313 981
40 155 737
40 33 358
40 152 766
40 293 935
40 24 650
40 116 1121
40 58 1124
40 200 1072
40 402 989
40 101 1123
45 428 197
45 225 389
45 32 976
45 59 1124
45 401 989
45 29 184
45 154 737
45 274 1197
45 228 1101
45 116 1012
45 26 1015
45 359 234
45 28 267
45 409 974
45 386 1042
45 282 1003
45 97 1165
45 307 151
45 195 1095
45 411 156
45 254 194
45 33 797
45 280 171
45 305 981
45 375 915
45 250 1125
45 361 971
45 286 952
45 381 954
45 390 863
45 33 358
45 152 766
45 203 388
45 89 1128
45 473 869
45 18 648
45 29 611
45 108 770
45 342 887
45 64 1112
50 299 1041
50 463 454
50 99 743
50 422 163
50 231 155
50 85 1093
50 404 970
50 364 929
50 160 735
50 395 986
50 223 360
50 321 902
50 258 1215
50 57 1219
50 196 358
50 241 1142
50 151 765
50 262 972
50 345 209
50 70 1241
50 35 359
50 296 128
50 211 1137
50 266 143
50 377 877
50 34 270
50 354 962
50 285 1126
50 471 818
50 461 910
50 180 1129
55 243 995
55 189 324
55 81 1090
55 173 1156
55 221 324
55 367 890
55 280 98
55 160 735
55 395 986
55 458 849
55 369 935
55 253 120
55 339 179
55 299 1051
55 62 1242
55 215 131
55 233 1170
55 271 1149
55 151 765
55 35 359
55 414 160
55 57 1218
55 436 440
55 406 972
55 479 819
55 34 270
55 354 962
55 324 902
55 204 1161
55 461 910
55 90 715
60 214 291
60 439 851
60 201 1176
60 312 936
60 330 152
60 404 148
60 395 986
60 160 735
60 414 426
60 369 935
60 269 1159
60 231 1015
60 406 972
60 451 189
60 473 852
60 151 765
60 53 1218
60 357 912
60 87 684
60 243 94
60 32 359
60 229 1186
60 205 108
60 182 293
60 439 971
60 168 1175
60 278 84
60 34 270
60 354 962
60 60 1131
65 166 1195
65 74 656
65 232 74
65 441 157
65 463 880
65 269 73
65 395 986
65 197 81
65 160 735
65 151 765
65 369 935
65 341 930
65 292 952
65 30 359
65 220 1027
65 418 868
65 431 1006
65 395 395
65 213 259
65 220 1207
65 266 1176
65 180 263
65 321 123
65 33 270
65 55 1136
65 197 1191
65 354 962
65 405 967
70 158 734
70 227 62
70 379 376
70 258 57
70 405 967
70 161 1216
70 397 887
70 313 100
70 395 986
70 204 231
70 206 1044
70 29 359
70 326 950
70 421 1029
70 237 1215
70 369 935
70 189 1218
70 151 765
70 193 60
70 177 227
70 273 972
70 33 270
70 67 620
70 434 107
70 218 1223
70 354 962
70 457 913
75 158 734
75 183 1236
75 415 1060
75 185 40
75 405 967
75 360 350
75 448 935
75 395 986
75 256 991
75 158 1231
75 167 200
75 187 1084
75 151 765
75 356 962
75 33 270
75 229 978
75 374 909
75 55 606
75 28 359
75 379 948
75 196 194
75 244 1217
75 314 957
75 213 1237
80 179 25
80 161 171
80 212 990
80 352 927
80 357 964
80 161 736
80 396 986
80 399 1082
80 151 763
80 29 359
80 164 1247
80 180 1091
80 44 573
80 188 164
80 177 1254
80 349 319
80 211 1250
80 444 979
80 406 966
80 34 270
80 380 948
80 238 1008
80 295 981
85 223 1027
85 29 361
85 380 949
85 407 966
85 395 1102
85 35 270
85 279 1003
85 203 1001
85 153 135
85 360 972
85 336 948
85 396 985
85 172 1114
85 152 763
85 335 298
85 161 735
85 181 136
85 168 14
85 36 552
85 438 1001
85 149 1271
85 204 1258
90 205 1040
90 31 361
90 395 986
90 330 262
90 244 1224
90 353 964
90 165 1141
90 290 1182
90 162 736
90 380 948
90 221 1163
90 433 1025
90 151 765
90 143 1279
90 406 967
90 152 119
90 209 1244
90 33 270
90 184 1018
90 179 108
90 334 961
90 463 787
90 16 527
90 270 1031
95 407 967
95 428 810
95 320 233
95 31 361
95 15 497
95 236 1235
95 264 1054
95 137 71
95 171 76
95 429 1050
95 162 736
95 380 948
95 198 1253
95 157 765
95 353 964
95 188 1061
95 217 1178
95 165 1041
95 33 270
95 400 986
95 280 1203
95 315 1004
95 158 1167
100 260 1230
100 172 1079
100 127 38
100 0 475
100 404 823
100 355 980
100 401 963
100 312 202
100 150 28
100 156 1057
100 28 365
100 207 1198
100 377 947
100 148 1195
100 259 1080
100 404 988
100 437 1055
100 317 1034
100 157 737
100 31 272
100 161 765
105 113 0
105 369 952
105 403 988
105 247 1238
105 343 982
105 161 765
105 317 1052
105 200 1208
105 26 360
105 301 172
105 442 1055
105 142 1217
105 134 1077
105 150 1106
105 158 736
105 256 1104
105 147 10
105 379 842
105 31 272
105 402 974
110 192 1229
110 118 1085
110 441 855
110 401 994
110 249 1126
110 128 1251
110 288 143
110 332 992
110 26 360
110 400 974
110 450 1067
110 237 1248
110 360 955
110 158 736
110 322 1078
110 355 859
110 140 1118
110 31 272
110 161 765
115 324 1005
115 98 1098
115 327 1096
115 122 1297
115 417 869
115 236 1166
115 26 360
115 126 1134
115 402 980
115 400 994
115 184 1244
115 233 1261
115 281 114
115 158 736
115 334 888
115 360 968
115 442 1067
115 31 272
115 161 765
120 223 1284
120 111 1159
120 231 1186
120 84 1119
120 122 1297
120 440 1067
120 330 1117
120 307 906
120 392 884
120 274 91
120 315 1020
120 396 983
120 31 272
120 158 736
120 171 1270
120 359 981
120 161 765
120 400 995
120 26 362
125 29 369
125 361 985
125 382 985
125 311 1020
125 96 1177
125 120 1297
125 445 1075
125 402 1000
125 212 1342
125 221 1213
125 74 1140
125 365 903
125 158 736
125 479 767
125 337 1139
125 288 921
125 31 272
125 161 765
130 440 1075
130 305 1026
130 471 789
130 474 734
130 99 1308
130 378 988
130 265 932
130 354 997
130 83 1195
130 153 771
130 345 921
130 396 1008
130 158 736
130 68 1144
130 28 372
130 31 272
130 211 1234
135 393 1011
135 53 1156
135 455 801
135 319 944
135 456 771
135 246 949
135 374 991
135 31 273
135 353 997
135 74 1200
135 200 1249
135 28 375
135 158 736
135 148 774
135 439 1070
135 305 1026
140 479 812
140 448 1062
140 305 1026
140 409 1131
140 159 737
140 190 1256
140 230 959
140 27 379
140 342 1006
140 371 991
140 31 273
140 429 786
140 301 951
140 441 810
140 386 1011
140 127 773
145 108 774
145 447 1062
145 386 1011
145 304 1027
145 25 382
145 275 977
145 31 273
145 209 984
145 148 735
145 461 832
145 429 826
145 413 1126
145 339 1006
145 400 808
145 368 1001
150 368 1028
150 31 271
150 84 767
150 185 1023
150 244 1008
150 382 830
150 28 383
150 366 1006
150 414 844
150 430 1101
150 152 733
150 438 855
150 305 1027
150 337 1004
150 449 1056
155 31 271
155 300 1044
155 449 1056
155 331 1014
155 228 1018
155 367 1031
155 366 1006
155 350 851
155 402 860
155 27 383
155 144 739
155 422 865
155 470 786
155 434 1095
155 60 763
155 169 1036
160 135 746
160 149 1051
160 447 799
160 203 1040
160 329 1030
160 380 874
160 368 1008
160 476 800
160 333 875
160 27 383
160 432 1095
160 31 271
160 449 1056
160 297 1049
160 358 1045
160 402 886
165 26 383
165 462 835
165 427 811
165 436 1090
165 387 914
165 129 1076
165 119 749
165 354 1024
165 355 1053
165 314 904
165 180 1064
165 449 1056
165 286 1065
165 321 1046
165 31 272
165 369 894
170 154 1093
170 351 912
170 29 272
170 351 1068
170 26 378
170 407 821
170 354 1029
170 435 1090
170 317 1060
170 278 1073
170 103 753
170 116 1089
170 297 928
170 448 1057
170 370 933
170 440 841
175 351 948
175 331 928
175 29 275
175 97 1126
175 133 1116
175 284 947
175 435 1090
175 448 1057
175 422 857
175 353 1035
175 25 381
175 86 760
175 348 1082
175 272 1085
175 390 840
175 309 1081
180 80 1130
180 374 855
180 116 1143
180 93 1189
180 264 1092
180 77 765
180 256 980
180 343 1096
180 401 865
180 337 968
180 309 1090
180 25 376
180 318 942
180 448 1057
180 435 1090
180 14 287
180 470 748
180 472 788
180 342 1053
185 56 759
185 326 984
185 312 1073
185 97 1158
185 308 954
185 247 1107
185 7 297
185 389 881
185 237 993
185 362 875
185 479 760
185 115 1183
185 450 804
185 307 1101
185 334 1115
185 448 1057
185 456 773
185 24 382
185 435 1090
185 76 1133
190 371 899
190 295 1121
190 23 377
190 138 1166
190 348 896
190 315 1141
190 464 777
190 433 821
190 434 1090
190 228 1125
190 440 788
190 312 997
190 451 1057
190 85 1178
190 291 978
190 212 1012
190 48 1177
190 43 763
190 298 1087
195 452 1057
195 434 1090
195 33 760
195 279 1107
195 279 990
195 441 793
195 302 1013
195 28 384
195 282 1134
195 358 914
195 222 1134
195 40 1183
195 308 1154
195 158 1157
195 192 1028
195 423 802
195 337 910
195 420 835
195 68 1194
200 178 1128
200 420 825
200 37 379
200 168 1059
200 469 517
200 263 1155
200 315 912
200 288 1035
200 347 934
200 286 1175
200 400 854
200 399 808
200 447 1080
200 446 1065
200 203 1156
200 256 1026
200 269 1121
205 194 1165
205 30 382
205 142 1084
205 454 1078
205 260 1169
205 456 513
205 242 1044
205 327 946
205 254 1141
205 377 862
205 298 923
205 204 1119
205 267 1048
205 385 834
205 405 840
205 446 1065
205 275 1193
210 363 841
210 445 1065
210 239 1159
210 224 1053
210 224 1117
210 454 1078
210 443 502
210 250 1189
210 260 1208
210 186 1181
210 368 887
210 250 1068
210 29 382
210 389 863
210 288 942
210 319 957
210 129 1097
215 445 1065
215 241 1204
215 28 382
215 345 862
215 347 899
215 172 1192
215 454 1078
215 370 886
215 255 1225
215 424 505
215 109 1131
215 296 964
215 273 948
215 221 1182
215 232 1074
215 212 1069
215 253 1093
220 445 1065
220 333 918
220 28 382
220 213 1101
220 227 1221
220 196 1097
220 454 1078
220 280 982
220 277 1080
220 402 505
220 243 1242
220 328 886
220 254 964
220 349 893
220 93 1152
220 202 1204
220 161 1214
225 445 1065
225 27 382
225 182 1110
225 379 493
225 149 1239
225 327 945
225 454 1078
225 201 1119
225 213 1237
225 261 1008
225 328 909
225 230 1250
225 235 975
225 312 909
225 78 1169
225 185 1225
225 304 1053
230 26 382
230 313 929
230 188 1133
230 354 493
230 141 1259
230 203 1250
230 239 1021
230 63 1173
230 453 1078
230 457 378
230 462 777
230 162 1135
230 316 956
230 215 996
230 444 1065
230 176 1247
230 294 926
230 328 1043
235 191 1268
235 337 493
235 151 1144
235 135 1278
235 222 1025
235 446 348
235 174 1152
235 196 1005
235 443 1065
235 452 1078
235 158 1272
235 478 826
235 302 974
235 29 382
235 465 894
235 445 782
235 298 938
235 350 1032
235 276 939
240 461 837
240 160 1165
240 279 968
240 177 1010
240 200 1043
240 434 813
240 436 922
240 261 956
240 28 382
240 443 1065
240 181 1296
240 431 332
240 372 1017
240 153 1282
240 306 492
240 286 996
240 451 1078
240 133 1163
245 163 1018
245 117 1185
245 287 485
245 419 823
245 424 297
245 443 1065
245 265 986
245 28 382
245 410 947
245 272 1018
245 179 1053
245 147 1183
245 229 1244
245 239 981
245 451 1078
245 441 850
245 399 1001
250 222 1010
250 126 1206
250 264 487
250 152 1027
250 34 377
250 453 1079
250 387 975
250 250 1009
250 421 868
250 416 280
250 103 1210
250 165 1058
250 444 1056
250 220 1225
250 415 1004
250 255 1046
250 401 846
255 231 1028
255 34 377
255 246 1059
255 213 1016
255 403 250
255 383 853
255 431 1011
255 105 1234
255 217 1203
255 479 750
255 444 1056
255 241 484
255 136 1033
255 82 1223
255 378 999
255 453 1079
255 410 881
255 151 1065
260 395 226
260 394 907
260 198 1185
260 440 1013
260 355 1032
260 220 1052
260 91 1256
260 140 1079
260 220 486
260 194 1034
260 364 872
260 233 1085
260 455 755
260 453 1079
260 34 379
260 122 1049
260 444 1056
265 106 1058
265 201 490
265 133 1093
265 79 1264
265 345 890
265 447 1024
265 206 1067
265 432 763
265 383 931
265 444 1056
265 222 1106
265 179 1164
265 382 203
265 182 1059
265 453 1079
265 34 379
265 342 1067
270 330 913
270 94 1084
270 175 490
270 176 1077
270 438 1061
270 412 766
270 192 1098
270 366 942
270 210 1125
270 120 1111
270 326 1101
270 33 379
270 448 1030
270 372 184
270 453 1079
270 162 1150
275 318 932
275 183 1113
275 453 1079
275 197 1149
275 438 1061
275 353 960
275 389 770
275 142 1129
275 108 1122
275 475 705
275 449 1030
275 156 487
275 77 1096
275 33 379
275 169 1096
275 311 1130
275 453 407
275 357 157
280 465 705
280 126 1104
280 171 1131
280 133 492
280 438 1061
280 450 1030
280 65 1105
280 375 782
280 95 1143
280 343 137
280 294 1165
280 410 375
280 164 1110
280 32 379
280 346 972
280 302 944
280 453 1079
280 183 1172
285 52 1120
285 278 1199
285 325 992
285 85 1149
285 438 1061
285 388 331
285 450 1030
285 159 1146
285 324 108
285 112 497
285 173 1195
285 359 793
285 32 379
285 288 962
285 105 1099
285 453 1079
285 149 1126
285 447 706
290 440 699
290 311 1011
290 143 1171
290 438 1061
290 453 1079
290 450 1030
290 50 1125
290 279 975
290 67 1165
290 479 729
290 360 304
290 262 1224
290 314 95
290 32 379
290 75 1098
290 163 1217
290 94 495
290 479 758
290 335 797
290 129 1144
295 470 768
295 151 1242
295 301 1025
295 320 810
295 449 1030
295 419 1079
295 342 272
295 55 1102
295 248 1253
295 76 500
295 459 735
295 32 379
295 433 694
295 262 996
295 129 1190
295 462 1072
295 108 1161
300 450 1026
300 252 1011
300 62 499
300 34 378
300 455 776
300 86 1191
300 295 812
300 425 746
300 413 1095
300 459 1071
300 144 1272
300 121 1221
300 234 1301
300 325 243
300 423 689
300 282 1040
305 450 1026
305 248 1030
305 134 1289
305 115 1251
305 471 731
305 75 1193
305 33 378
305 459 1071
305 403 1112
305 276 826
305 441 780
305 266 1059
305 53 501
305 406 761
305 417 683
305 307 216
310 450 1026
310 289 188
310 32 378
310 461 725
310 47 501
310 64 1221
310 114 1278
310 384 776
310 390 1119
310 253 1072
310 263 839
310 240 1043
310 460 1071
310 408 684
310 425 785
310 425 109
315 450 1026
315 433 141
315 460 1071
315 32 378
315 42 504
315 439 720
315 407 776
315 224 1058
315 405 677
315 51 1251
315 107 1294
315 374 1126
315 273 155
315 241 1086
315 364 798
315 249 863
320 450 1026
320 418 708
320 460 1071
320 393 672
320 341 812
320 244 881
320 361 1132
320 209 1070
320 446 151
320 384 781
320 39 504
320 252 131
320 32 378
320 229 1097
325 450 1026
325 243 899
325 38 504
325 32 378
325 385 661
325 362 794
325 235 102
325 342 1145
325 460 1071
325 395 697
325 331 847
325 212 1120
325 190 1087
330 221 69
330 450 1026
330 342 807
330 38 504
330 32 378
330 178 1098
330 472 784
330 228 915
330 468 733
330 321 872
330 371 651
330 332 1145
330 201 1128
330 462 1071
330 373 687
335 450 1026
335 306 900
335 38 504
335 32 378
335 459 235
335 206 44
335 454 766
335 322 1147
335 318 829
335 357 638
335 447 742
335 216 942
335 181 1146
335 352 672
335 156 1123
335 461 1071
335 456 793
340 450 1026
340 38 504
340 32 378
340 434 222
340 427 758
340 479 803
340 295 922
340 346 618
340 139 1128
340 300 848
340 440 807
340 434 781
340 461 1071
340 205 950
340 306 1145
340 330 656
340 166 1163
345 450 1026
345 301 642
345 421 816
345 39 504
345 145 1179
345 459 820
345 200 978
345 289 941
345 119 1148
345 303 1145
345 331 601
345 278 873
345 414 790
345 403 773
345 32 378
345 461 1071
345 409 203
350 398 824
350 288 615
350 295 1148
350 30 376
350 261 892
350 384 178
350 100 1173
350 442 833
350 394 807
350 190 998
350 474 839
350 379 787
350 125 1200
350 45 502
350 318 576
350 276 975
355 469 774
355 373 143
355 252 917
355 30 376
355 275 590
355 269 998
355 43 502
355 468 802
355 479 714
355 360 806
355 378 819
355 110 1211
355 379 841
355 83 1181
355 177 1004
355 305 554
355 461 849
355 299 1148
355 421 843
360 168 1038
360 68 1190
360 264 561
360 42 502
360 363 854
360 89 1224
360 30 376
360 229 944
360 451 725
360 348 124
360 451 783
360 447 816
360 438 871
360 463 1064
360 456 1028
360 253 1029
360 293 530
360 311 1143
360 342 821
360 405 859
360 358 839
365 424 738
365 322 1136
365 155 1052
365 30 376
365 42 502
365 250 538
365 422 884
365 74 1234
365 319 837
365 211 962
365 277 505
365 423 821
365 452 1029
365 465 1064
365 332 105
365 424 794
365 479 776
365 251 1053
365 382 883
365 341 845
365 348 869
370 469 782
370 304 852
370 237 518
370 30 376
370 42 502
370 452 1028
370 396 744
370 332 1132
370 370 897
370 319 867
370 465 1064
370 243 1088
370 335 890
370 146 1068
370 404 839
370 262 485
370 404 807
370 398 910
370 195 982
375 385 855
375 223 488
375 318 905
375 30 376
375 282 870
375 477 807
375 352 916
375 446 802
375 173 1014
375 129 1092
375 250 466
375 237 1119
375 340 1129
375 37 502
375 371 763
375 380 924
375 305 888
375 465 1064
375 380 819
380 210 469
380 30 376
380 369 871
380 463 827
380 361 837
380 118 1102
380 308 920
380 333 935
380 157 1023
380 467 1064
380 357 1120
380 287 907
380 339 776
380 237 443
380 360 948
380 429 816
380 229 1155
380 37 502
380 266 887
385 103 1124
385 343 973
385 367 1111
385 30 376
385 273 925
385 294 932
385 251 899
385 224 426
385 342 846
385 231 1181
385 319 795
385 131 1048
385 346 881
385 467 1064
385 40 504
385 323 947
385 411 833
385 445 841
385 194 440
390 258 938
390 224 1205
390 396 860
390 303 976
390 30 376
390 329 988
390 424 866
390 333 902
390 460 772
390 236 917
390 89 1144
390 468 1064
390 291 813
390 473 823
390 324 864
390 40 504
390 114 1065
390 182 416
390 213 402
390 376 1105
390 286 954
395 36 504
395 313 1009
395 217 1236
395 245 949
395 468 1064
395 381 877
395 307 884
395 203 374
395 74 1154
395 455 834
395 30 376
395 222 938
395 477 523
395 437 790
395 407 880
395 390 1094
395 270 831
395 92 1096
395 272 976
395 291 990
395 170 395
395 318 915
400 414 802
400 362 898
400 197 349
400 402 1092
400 36 505
400 32 377
400 253 853
400 462 1072
400 280 1008
400 390 899
400 204 959
400 232 970
400 434 860
400 300 1024
400 159 366
400 297 926
400 266 980
400 457 1015
400 294 900
400 467 530
405 288 1043
405 398 811
405 276 912
405 372 923
405 147 342
405 35 505
405 181 325
405 462 1072
405 458 535
405 189 973
405 230 873
405 217 986
405 420 884
405 32 377
405 271 1019
405 447 1027
405 414 1081
405 352 916
405 285 942
405 245 1016
410 258 926
410 427 1075
410 411 1054
410 250 1046
410 32 377
410 380 820
410 212 994
410 356 942
410 213 892
410 462 1072
410 450 543
410 275 1066
410 229 1041
410 142 315
410 254 969
410 169 305
410 177 980
410 337 941
410 34 499
410 404 907
415 264 1081
415 240 1072
415 177 979
415 365 834
415 461 1067
415 32 377
415 341 960
415 202 1007
415 241 941
415 386 1081
415 34 499
415 437 1068
415 440 556
415 159 280
415 192 913
415 242 978
415 391 923
415 218 1053
415 131 295
415 328 959
420 147 1022
420 368 1105
420 230 1082
420 461 1067
420 202 1075
420 332 991
420 430 564
420 340 837
420 444 1074
420 248 1106
420 223 981
420 224 995
420 149 255
420 34 499
420 32 377
420 317 985
420 173 931
420 178 1047
420 119 270
420 377 947
425 155 943
425 324 850
425 171 1058
425 300 1006
425 205 1005
425 133 1033
425 138 228
425 320 1013
425 347 1135
425 461 1067
425 193 1088
425 109 241
425 197 989
425 34 499
425 446 1074
425 232 1127
425 219 1095
425 360 967
425 28 377
425 423 572
430 133 988
430 468 784
430 120 1069
430 183 996
430 308 1037
430 174 1113
430 208 1122
430 479 804
430 336 1163
430 459 726
430 34 499
430 219 1145
430 286 1033
430 156 1075
430 421 572
430 308 867
430 435 312
430 444 1061
430 28 377
430 186 1025
430 346 1001
430 94 215
430 127 200
435 27 377
435 192 1148
435 295 1059
435 167 1011
435 144 1090
435 420 288
435 454 794
435 452 1092
435 273 1048
435 172 1043
435 324 1187
435 85 190
435 113 1008
435 113 170
435 289 881
435 107 1088
435 33 499
435 332 1011
435 440 1065
435 410 581
435 438 731
435 212 1160
435 162 1131
435 472 808
440 96 1105
440 33 498
440 405 587
440 321 1031
440 442 808
440 457 493
440 150 1029
440 284 1086
440 452 1092
440 73 169
440 305 1208
440 150 1059
440 127 1114
440 28 377
440 407 273
440 455 452
440 261 1070
440 104 147
440 198 1187
440 177 1168
440 420 737
440 440 1065
440 97 1028
440 270 893
440 451 826
440 150 1142
445 173 1185
445 33 498
445 116 1128
445 443 495
445 140 1161
445 396 250
445 423 814
445 130 1044
445 434 457
445 80 1044
445 28 377
445 437 843
445 274 1108
445 295 1224
445 259 914
445 139 1070
445 403 596
445 97 127
445 397 746
445 88 1125
445 190 1213
445 60 141
445 440 1065
445 314 1050
445 248 1096
445 451 1092
450 53 114
450 416 459
450 423 862
450 33 498
450 469 800
450 376 754
450 245 935
450 263 1128
450 63 1070
450 407 831
450 438 1060
450 157 1213
450 420 490
450 82 102
450 469 740
450 458 1083
450 123 1186
450 381 231
450 178 1230
450 127 1084
450 237 1121
450 114 1062
450 399 612
450 304 1088
450 99 1163
450 30 378
455 357 763
455 292 1117
455 70 77
455 151 1239
455 33 498
455 29 378
455 377 211
455 391 616
455 408 877
455 402 487
455 41 87
455 247 1160
455 395 842
455 230 1137
455 99 1074
455 48 1095
455 110 1100
455 89 1183
455 229 957
455 458 1083
455 439 1060
455 443 753
455 398 466
455 112 1203
455 162 1254
455 446 823
460 382 620
460 288 1136
460 432 850
460 33 498
460 393 894
460 75 1219
460 437 719
460 479 351
460 159 1289
460 439 1060
460 382 488
460 479 833
460 56 49
460 383 859
460 218 978
460 339 768
460 359 188
460 218 1161
460 29 378
460 138 1262
460 458 1083
460 424 766
460 89 1253
460 93 1119
460 55 1158
460 239 1180
460 379 461
465 209 1187
465 418 872
465 29 378
465 131 1284
465 365 495
465 466 331
465 204 1007
465 365 876
465 358 465
465 82 1273
465 320 781
465 470 856
465 32 498
465 454 1083
465 232 1200
465 439 1060
465 57 1244
465 46 31
465 379 910
465 377 629
465 404 740
465 79 1126
465 37 1190
465 405 786
465 282 1160
465 349 171
470 377 764
470 200 1209
470 459 880
470 29 378
470 192 1018
470 373 630
470 450 315
470 222 1227
470 405 904
470 338 154
470 274 1189
470 391 804
470 61 1295
470 446 1090
470 438 1060
470 32 498
470 60 1157
470 357 894
470 367 928
470 294 783
470 41 1265
470 349 500
470 334 467
475 314 478
475 324 137
475 391 928
475 446 902
475 359 940
475 463 780
475 476 805
475 435 291
475 343 904
475 212 1254
475 193 1230
475 446 1090
475 330 508
475 438 1060
475 32 498
475 29 378
475 349 786
475 176 1036
475 368 636
475 371 823
475 275 794
475 265 1212
480 255 1241
480 310 121
480 434 932
480 379 958
480 327 814
480 353 841
480 178 1257
480 416 268
480 161 1051
480 415 1079
480 296 488
480 29 378
480 361 637
480 330 921
480 310 522
480 32 498
480 460 823
480 349 953
480 251 800
480 433 1111
480 206 1284
480 444 796
485 248 1252
485 424 813
485 402 246
485 168 1278
485 29 378
485 339 857
485 292 529
485 403 1093
485 199 1293
485 366 982
485 422 961
485 476 882
485 414 1128
485 32 498
485 303 839
485 141 1065
485 342 971
485 354 649
485 230 808
485 318 935
485 275 505
485 303 104
485 473 252
485 440 845
490 29 378
490 280 864
490 235 1279
490 356 1010
490 385 1115
490 456 228
490 324 881
490 32 498
490 260 516
490 387 226
490 155 1308
490 128 1079
490 463 899
490 398 1142
490 213 815
490 329 985
490 272 549
490 349 652
490 422 864
490 313 945
490 403 838
490 411 994
490 291 79
495 29 378
495 345 1036
495 384 1158
495 479 811
495 309 958
495 258 557
495 383 859
495 235 535
495 451 923
495 365 1133
495 226 1305
495 32 498
495 397 890
495 345 653
495 444 198
495 187 816
495 406 1021
495 259 886
495 320 996
495 309 896
495 117 1095
495 371 199
500 295 916
500 171 823
500 445 958
500 100 1132
500 241 571
500 295 984
500 431 169
500 307 1008
500 324 1067
500 471 733
500 394 1055
500 38 497
500 347 1153
500 365 885
500 30 376
500 470 835
500 241 913
500 337 655
500 220 546
500 353 184
500 382 915
500 363 1195
505 383 1086
505 220 586
505 331 1171
505 479 776
505 350 908
505 285 996
505 38 497
505 150 823
505 365 939
505 279 933
505 437 982
505 306 1100
505 299 1026
505 30 376
505 450 746
505 91 1142
505 421 144
505 217 941
505 336 657
505 206 562
505 349 1203
505 338 160
505 457 860
510 357 969
510 274 1012
510 436 1008
510 465 792
510 195 961
510 80 1158
510 328 1222
510 38 497
510 318 130
510 430 762
510 265 949
510 294 1124
510 444 886
510 30 376
510 186 582
510 202 600
510 331 930
510 128 829
510 407 121
510 336 658
510 312 1195
510 376 1120
510 289 1044
515 189 616
515 410 780
515 287 1213
515 311 112
515 425 907
515 172 985
515 110 844
515 284 1060
515 435 1038
515 368 1151
515 244 979
515 318 944
515 30 376
515 262 1034
515 167 599
515 66 1174
515 316 1231
515 335 665
515 37 497
515 453 807
515 276 1152
515 348 999
520 263 1169
520 393 796
520 296 965
520 52 1204
520 474 820
520 273 1080
520 173 629
520 356 1174
520 298 1239
520 333 669
520 37 497
520 434 1060
520 465 775
520 441 828
520 30 376
520 149 620
520 416 936
520 259 1047
520 343 1033
520 150 1008
520 277 1225
520 229 992
520 90 855
525 154 649
525 249 1286
525 470 873
525 436 1090
525 345 1192
525 443 800
525 425 848
525 246 1072
525 238 1196
525 333 669
525 283 1262
525 37 497
525 30 376
525 136 636
525 400 958
525 129 1043
525 62 871
525 458 835
525 210 1014
525 375 817
525 279 980
525 269 1092
525 345 1056
530 453 856
530 261 1300
530 342 1088
530 227 1222
530 195 1028
530 392 982
530 234 1099
530 148 665
530 120 657
530 435 1117
530 116 1065
530 37 497
530 430 820
530 276 992
530 260 1111
530 30 376
530 240 1290
530 48 873
530 368 839
530 333 1262
530 460 883
530 330 674
530 417 866
535 220 1128
535 439 873
535 406 884
535 449 913
535 422 1140
535 129 684
535 266 1038
535 27 876
535 224 1299
535 93 1095
535 30 376
535 358 859
535 175 1047
535 252 1133
535 105 676
535 414 843
535 380 1012
535 330 674
535 336 1114
535 37 497
535 209 1242
535 476 778
540 248 1153
540 121 702
540 30 376
540 460 796
540 215 1142
540 439 929
540 324 674
540 266 1075
540 479 814
540 93 692
540 365 1035
540 390 904
540 158 1062
540 199 1259
540 77 1127
540 398 860
540 419 1185
540 431 887
540 347 885
540 330 1139
540 37 497
545 324 1165
545 438 141
545 237 1176
545 113 724
545 35 497
545 209 1160
545 353 1061
545 134 1095
545 423 904
545 385 880
545 184 1267
545 268 1117
545 324 674
545 469 839
545 85 714
545 414 1200
545 442 805
545 425 957
545 61 1143
545 339 911
545 383 922
545 31 376
550 270 1151
550 34 500
550 78 735
550 454 857
550 426 832
550 110 743
550 418 985
550 195 1189
550 114 1121
550 475 960
550 425 126
550 368 900
550 38 377
550 320 670
550 318 1195
550 371 943
550 368 1123
550 327 930
550 225 1198
550 403 929
555 319 949
555 366 966
555 96 1130
555 360 1106
555 216 1217
555 394 954
555 268 1183
555 321 671
555 440 878
555 41 380
555 355 920
555 411 852
555 63 1052
555 311 1211
555 77 757
555 108 762
555 466 999
555 406 1003
555 330 1108
555 191 1204
555 479 474
555 34 500
560 339 942
560 204 1244
560 398 874
560 179 1228
560 466 459
560 64 778
560 321 671
560 107 784
560 403 1030
560 41 380
560 347 1081
560 292 1217
560 460 1016
560 66 1044
560 423 895
560 356 982
560 318 1133
560 78 1151
560 309 978
560 382 971
560 266 1212
560 34 500
565 446 1043
565 375 989
565 443 448
565 331 1059
565 61 799
565 299 999
565 386 1052
565 386 899
565 359 1026
565 411 918
565 309 1155
565 192 1265
565 321 671
565 74 1034
565 66 1164
565 107 799
565 168 1252
565 329 958
565 48 377
565 279 1232
565 266 1212
565 34 500
570 430 427
570 326 968
570 33 500
570 289 1024
570 319 671
570 295 1175
570 92 1009
570 52 377
570 53 1177
570 264 1243
570 372 917
570 354 1036
570 315 1039
570 382 1070
570 436 1067
570 250 1260
570 400 941
570 103 817
570 186 1282
570 371 1011
570 157 1283
570 57 817
575 33 500
575 319 671
575 417 407
575 361 1033
575 61 377
575 236 1269
575 104 992
575 285 1194
575 477 412
575 479 800
575 175 1308
575 147 1290
575 282 1054
575 468 756
575 358 939
575 85 847
575 326 995
575 353 1052
575 423 1091
575 300 1011
575 375 1088
575 58 833
575 394 962
580 33 500
580 223 1286
580 326 1020
580 271 1218
580 47 853
580 320 671
580 380 980
580 479 800
580 343 1075
580 456 400
580 281 1083
580 166 1329
580 344 955
580 358 1047
580 143 1299
580 286 995
580 109 980
580 447 761
580 365 1117
580 407 388
580 69 871
580 414 1113
580 63 377
585 34 500
585 356 1136
585 324 1106
585 469 813
585 55 892
585 402 1140
585 322 1033
585 70 370
585 436 379
585 342 1066
585 280 1113
585 393 368
585 439 766
585 320 671
585 255 1232
585 371 995
585 39 869
585 116 963
585 272 971
585 339 968
590 47 899
590 384 352
590 276 1128
590 359 1015
590 323 987
590 317 1130
590 429 766
590 259 952
590 422 354
590 74 370
590 25 880
590 320 1054
590 320 671
590 343 1157
590 461 832
590 393 1161
590 128 939
590 242 1246
590 333 1080
590 34 500
595 35 905
595 310 1010
595 268 1154
595 306 1078
595 233 1277
595 335 1175
595 77 369
595 306 1153
595 136 920
595 251 922
595 449 854
595 384 1200
595 370 332
595 320 671
595 409 331
595 344 1026
595 443 725
595 323 1097
595 424 772
595 34 500
600 292 1186
600 357 311
600 330 1050
600 325 673
600 81 372
600 294 1131
600 296 1030
600 421 729
600 244 884
600 40 495
600 471 744
600 142 900
600 433 861
600 293 1099
600 422 775
600 396 308
600 256 1176
600 331 1200
605 399 742
605 453 747
605 40 495
605 144 886
605 284 1155
605 285 1046
605 325 669
605 281 1208
605 83 372
605 383 284
605 424 875
605 313 1074
605 279 1116
605 248 1198
605 315 1248
605 420 776
605 365 1243
605 344 291
605 232 864
610 307 1249
610 325 669
610 429 749
610 329 267
610 422 876
610 275 1176
610 300 1091
610 352 1245
610 91 372
610 380 756
610 258 1136
610 275 1072
610 418 776
610 374 262
610 237 1219
610 39 495
610 222 836
610 144 872
610 275 1227
610 479 801
615 284 1116
615 144 846
615 361 238
615 268 1241
615 337 1278
615 297 1258
615 467 767
615 260 1207
615 91 372
615 319 248
615 231 1249
615 216 807
615 361 768
615 268 1086
615 407 755
615 416 779
615 39 495
615 463 813
615 424 877
615 246 1162
615 325 669
620 420 878
620 250 1113
620 236 1183
620 263 1247
620 387 764
620 307 227
620 348 216
620 143 833
620 438 826
620 221 1285
620 278 1124
620 442 790
620 341 788
620 328 1291
620 416 779
620 39 495
620 325 669
620 286 1277
620 89 372
620 253 1227
620 206 789
625 263 1150
625 241 1130
625 247 1243
625 210 1292
625 297 204
625 417 834
625 408 806
625 227 1208
625 38 495
625 278 1289
625 323 800
625 254 1286
625 315 1330
625 143 813
625 198 755
625 416 871
625 415 779
625 335 199
625 367 785
625 89 372
625 325 669
630 251 1182
630 349 797
630 396 849
630 217 1235
630 198 1302
630 232 1153
630 272 1297
630 238 1265
630 239 1313
630 146 789
630 290 182
630 375 819
630 187 733
630 38 495
630 416 779
630 409 864
630 322 174
630 88 374
630 307 820
630 325 669
635 185 1311
635 239 1313
635 222 1171
635 245 1198
635 146 789
635 209 1257
635 290 182
635 371 858
635 375 819
635 332 825
635 187 733
635 38 495
635 416 779
635 409 864
635 322 174
635 88 374
635 307 820
635 228 1285
635 325 669
640 315 842
640 326 867
640 227 1285
640 199 1281
640 416 779
640 266 129
640 212 1196
640 373 982
640 406 846
640 320 670
640 143 763
640 38 495
640 239 1222
640 274 851
640 307 131
640 88 374
640 360 879
640 176 685
645 227 1242
645 351 1000
645 88 374
645 297 868
645 261 105
645 421 780
645 260 866
645 148 744
645 202 1219
645 320 670
645 303 900
645 38 495
645 347 901
645 296 109
645 175 654
645 401 838
650 242 880
650 216 1271
650 250 79
650 283 925
650 332 921
650 190 1245
650 88 374
650 320 670
650 470 482
650 328 1023
650 290 93
650 38 495
650 393 825
650 420 772
650 281 889
650 169 631
650 152 726
655 166 605
655 208 1290
655 479 772
655 303 1046
655 391 813
655 241 59
655 262 960
655 180 1260
655 228 891
655 266 907
655 281 67
655 87 374
655 38 495
655 317 941
655 420 772
655 322 669
655 455 490
655 155 712
660 275 41
660 464 787
660 474 506
660 237 989
660 322 669
660 281 1068
660 300 967
660 221 900
660 438 499
660 169 1283
660 87 374
660 38 495
660 248 924
660 420 772
660 197 1307
660 163 575
660 163 698
660 384 804
665 37 495
665 477 846
665 322 669
665 264 1096
665 190 1319
665 229 946
665 243 1279
665 164 548
665 216 1010
665 172 685
665 464 508
665 199 934
665 448 804
665 425 504
665 87 374
665 165 1297
665 382 794
665 476 816
665 284 990
665 465 1008
665 421 772
670 189 951
670 37 495
670 217 964
670 410 512
670 425 771
670 180 1341
670 184 1039
670 431 827
670 250 1117
670 220 1280
670 269 1009
670 156 1323
670 442 1039
670 87 374
670 381 784
670 450 504
670 158 520
670 458 834
670 322 670
670 469 862
670 179 680
675 174 967
675 410 838
675 196 1277
675 158 1062
675 435 510
675 238 1143
675 382 776
675 405 520
675 155 500
675 468 457
675 249 1034
675 443 856
675 189 671
675 448 880
675 38 495
675 428 1073
675 427 770
675 472 790
675 322 670
675 84 378
675 207 978
680 447 469
680 421 502
680 231 1178
680 375 763
680 35 495
680 199 660
680 152 466
680 84 378
680 177 1280
680 394 529
680 393 856
680 434 899
680 232 1055
680 163 996
680 458 808
680 191 1003
680 427 770
680 322 670
680 420 1110
680 422 869
680 128 1080
685 177 1280
685 104 1104
685 227 1206
685 35 495
685 376 763
685 152 466
685 84 378
685 458 808
685 394 529
685 393 856
685 434 899
685 232 1055
685 163 996
685 406 506
685 191 1003
685 427 770
685 322 670
685 420 1110
685 199 658
685 422 869
685 426 470
690 81 378
690 135 417
690 32 495
690 193 1094
690 378 758
690 479 768
690 382 912
690 163 1039
690 427 770
690 407 941
690 414 841
690 322 670
690 202 656
690 395 1176
690 409 471
690 461 420
690 388 509
690 219 1233
690 140 1035
690 141 1250
690 377 556
690 357 887
690 79 1123
695 427 772
695 126 386
695 183 1110
695 383 472
695 342 906
695 54 1154
695 368 931
695 389 959
695 389 855
695 77 378
695 370 564
695 321 670
695 475 839
695 464 785
695 204 1262
695 32 495
695 441 404
695 155 1053
695 369 510
695 381 1225
695 211 655
695 134 1044
695 471 391
695 377 754
695 120 1223
700 189 1271
700 448 803
700 362 574
700 28 497
700 478 812
700 219 651
700 365 1251
700 375 754
700 327 924
700 463 854
700 78 378
700 370 478
700 377 881
700 461 373
700 378 980
700 355 516
700 155 1141
700 118 366
700 321 670
700 37 1167
700 426 383
700 147 1062
700 426 773
700 121 1062
700 106 1186
700 351 943
705 88 1176
705 430 814
705 457 830
705 446 872
705 413 364
705 337 523
705 351 583
705 373 751
705 338 951
705 110 1086
705 33 496
705 368 911
705 76 379
705 423 773
705 442 347
705 357 475
705 225 637
705 324 668
705 109 338
705 313 944
705 142 1083
705 273 1257
705 141 1148
705 365 1003
710 434 884
710 234 629
710 102 1092
710 362 939
710 72 1150
710 351 485
710 135 1096
710 258 1228
710 428 327
710 348 1020
710 345 590
710 325 528
710 395 343
710 439 853
710 81 384
710 318 979
710 406 832
710 122 1171
710 373 752
710 422 774
710 33 491
710 322 668
710 298 966
710 103 309
715 385 321
715 333 1038
715 320 533
715 53 1150
715 95 1105
715 309 993
715 95 280
715 33 488
715 245 619
715 391 848
715 361 965
715 125 1130
715 415 865
715 415 775
715 371 755
715 99 1189
715 84 387
715 249 1202
715 338 490
715 283 982
715 322 671
715 340 583
715 410 307
720 359 759
720 319 1062
720 318 534
720 253 609
720 83 1195
720 236 1175
720 354 1010
720 320 669
720 87 1119
720 274 1002
720 398 886
720 412 778
720 372 299
720 47 1128
720 300 1010
720 408 926
720 333 577
720 86 250
720 78 376
720 376 873
720 478 771
720 327 497
720 116 1137
720 30 491
720 394 285
725 78 375
725 358 282
725 313 506
725 381 894
725 468 792
725 320 668
725 262 1032
725 29 490
725 350 761
725 359 882
725 396 948
725 64 1214
725 260 602
725 397 779
725 88 1125
725 28 1137
725 377 271
725 309 1085
725 352 1039
725 324 576
725 317 535
725 286 1038
725 110 1150
725 82 220
725 221 1145
730 78 375
730 384 969
730 281 1061
730 341 256
730 448 807
730 320 668
730 368 910
730 390 784
730 341 761
730 364 245
730 468 761
730 78 1140
730 343 1076
730 317 535
730 74 194
730 102 1169
730 209 1110
730 29 490
730 300 1098
730 319 573
730 258 1046
730 475 823
730 346 897
730 45 1250
730 310 511
730 272 599
735 26 490
735 251 1083
735 69 168
735 277 1077
735 320 668
735 349 922
735 72 1154
735 375 985
735 333 771
735 299 513
735 292 1123
735 96 1174
735 319 568
735 199 1088
735 446 775
735 460 844
735 351 219
735 333 1108
735 330 237
735 279 601
735 75 375
735 378 784
735 329 916
735 437 827
735 317 535
740 243 1102
740 26 490
740 332 1141
740 320 668
740 69 1163
740 317 210
740 370 1014
740 326 766
740 317 535
740 192 1058
740 466 724
740 420 842
740 92 1196
740 286 1141
740 338 940
740 291 516
740 319 561
740 340 199
740 311 925
740 451 863
740 288 601
740 75 375
740 62 141
740 428 788
740 369 789
740 270 1103
745 26 490
745 181 1030
745 320 668
745 276 1162
745 318 561
745 362 1036
745 286 525
745 313 535
745 264 1126
745 328 765
745 231 1132
745 81 1206
745 304 188
745 432 877
745 75 375
745 317 946
745 324 1177
745 288 601
745 53 120
745 64 1172
745 356 792
745 436 719
745 404 859
745 412 809
745 300 934
745 332 185
750 26 490
750 288 165
750 320 668
750 179 991
750 278 528
750 338 791
750 304 538
750 325 762
750 392 820
750 262 1186
750 223 1155
750 291 601
750 351 1058
750 75 1211
750 408 717
750 312 1211
750 287 952
750 317 561
750 75 375
750 417 893
750 252 1150
750 47 90
750 303 964
750 315 155
750 385 872
750 61 1172
755 26 490
755 276 965
755 397 909
755 68 1224
755 42 75
755 300 537
755 290 608
755 273 521
755 474 875
755 292 981
755 298 133
755 279 142
755 320 668
755 240 1174
755 213 1176
755 76 375
755 331 793
755 375 840
755 368 894
755 253 1210
755 346 1085
755 57 1180
755 313 563
755 301 1252
755 172 954
755 317 760
755 378 712
760 26 490
760 354 856
760 350 706
760 320 668
760 273 521
760 58 1244
760 264 977
760 462 899
760 291 608
760 233 1191
760 308 756
760 281 996
760 286 113
760 289 1278
760 384 927
760 76 375
760 165 928
760 267 122
760 354 906
760 300 537
760 54 1194
760 318 796
760 478 775
760 202 1194
760 312 563
760 243 1227
760 336 1108
765 189 1217
765 342 876
765 300 537
765 255 96
765 77 376
765 291 608
765 231 1245
765 271 92
765 367 945
765 301 754
765 266 1014
765 54 1185
765 29 487
765 154 891
765 275 1304
765 222 1214
765 305 800
765 56 1246
765 247 991
765 311 561
765 476 800
765 321 666
765 328 697
765 337 930
765 327 1132
765 456 783
765 273 521
765 446 924
770 233 1007
770 238 73
770 176 1236
770 142 864
770 300 537
770 77 376
770 284 746
770 291 608
770 258 1028
770 289 800
770 319 668
770 297 74
770 28 487
770 326 891
770 323 946
770 267 77
770 462 819
770 432 800
770 50 1180
770 257 1342
770 311 561
770 316 1142
770 273 521
770 222 1266
770 206 1238
770 50 1252
770 301 692
770 423 956
770 351 961
775 245 1046
775 334 980
775 44 1256
775 478 881
775 27 487
775 273 521
775 279 794
775 291 608
775 446 844
775 308 913
775 273 737
775 47 1178
775 243 1362
775 130 837
775 409 812
775 299 538
775 319 668
775 213 1281
775 228 60
775 76 376
775 196 1258
775 318 92
775 311 561
775 219 1027
775 307 1169
775 406 985
775 252 58
775 275 686
775 307 955
775 161 1260
780 466 910
780 393 837
780 27 487
780 273 521
780 113 809
780 43 1256
780 249 681
780 291 608
780 297 538
780 226 1379
780 294 1195
780 432 863
780 468 865
780 313 561
780 264 722
780 184 1280
780 76 376
780 342 116
780 291 975
780 230 1071
780 321 670
780 322 997
780 46 1179
780 271 797
780 291 930
780 208 1041
780 201 1316
780 154 1275
780 384 1011
785 27 487
785 40 1258
785 290 608
785 273 521
785 216 1086
785 447 902
785 266 704
785 37 1191
785 195 1072
785 97 789
785 172 1290
785 479 799
785 359 138
785 411 879
785 379 854
785 194 1325
785 321 670
785 227 674
785 141 1292
785 308 1015
785 284 1212
785 273 943
785 81 376
785 455 929
785 296 538
785 271 797
785 274 998
785 313 561
785 368 1045
790 367 882
790 27 487
790 290 608
790 273 521
790 182 1346
790 165 1300
790 290 1035
790 440 954
790 204 1103
790 350 1072
790 428 918
790 259 964
790 81 376
790 271 1236
790 39 1259
790 313 561
790 261 1017
790 458 806
790 255 787
790 265 685
790 182 1095
790 205 669
790 321 670
790 296 538
790 85 755
790 397 902
790 384 190
790 26 1199
790 133 1314
795 412 947
795 27 487
795 33 1263
795 290 608
795 273 521
795 403 201
795 180 665
795 255 664
795 294 540
795 157 1348
795 382 924
795 434 820
795 428 970
795 244 1023
795 12 1238
795 333 1101
795 83 370
795 122 1330
795 269 1054
795 189 1121
795 322 674
795 170 1115
795 251 786
795 252 1244
795 354 903
795 312 561
795 232 994
795 70 726
800 258 1062
800 27 487
800 271 519
800 428 208
800 326 676
800 290 608
800 241 771
800 159 659
800 424 984
800 397 971
800 229 1038
800 174 1138
800 419 830
800 252 642
800 292 540
800 55 695
800 83 370
800 316 1131
800 369 947
800 244 1265
800 216 1010
800 158 1132
800 311 561
800 342 927
805 385 991
805 300 1162
805 355 965
805 240 1072
805 405 832
805 325 678
805 199 1013
805 28 491
805 237 757
805 80 368
805 310 561
805 39 673
805 162 1157
805 454 243
805 143 1151
805 265 508
805 202 1063
805 254 617
805 290 541
805 233 1282
805 412 1008
805 136 664
805 289 607
805 335 949
810 233 744
810 26 652
810 317 970
810 322 679
810 290 542
810 29 490
810 80 368
810 396 837
810 221 1298
810 310 561
810 192 1072
810 129 1159
810 292 606
810 154 1169
810 224 1087
810 277 1191
810 113 662
810 267 501
810 397 1026
810 477 255
810 255 601
810 370 1016
810 345 990
810 184 1040
815 227 728
815 166 1048
815 322 679
815 180 1082
815 386 841
815 261 582
815 29 490
815 80 368
815 7 623
815 310 561
815 112 1180
815 267 1224
815 292 606
815 144 1195
815 289 542
815 87 656
815 387 1050
815 306 993
815 267 501
815 205 1098
815 360 1035
815 329 1006
815 206 1326
820 324 681
820 377 1314
820 319 1029
820 188 1113
820 167 1098
820 193 1349
820 479 757
820 296 1015
820 80 368
820 225 710
820 310 561
820 27 490
820 291 606
820 374 854
820 261 570
820 65 650
820 267 501
820 287 541
820 97 1188
820 349 1056
820 249 1249
820 150 1072
820 378 1067
820 136 1204
825 324 681
825 267 501
825 332 1084
825 81 368
825 370 1319
825 310 561
825 461 662
825 308 1046
825 27 490
825 291 606
825 277 1048
825 183 1362
825 224 697
825 233 1271
825 150 1114
825 265 564
825 361 1094
825 85 1207
825 371 866
825 468 764
825 42 640
825 122 1219
825 136 1085
825 174 1126
825 287 541
830 286 541
830 324 1104
830 104 1235
830 119 1106
830 291 1074
830 26 637
830 75 1223
830 366 1301
830 136 1131
830 310 561
830 220 1319
830 467 735
830 357 855
830 222 685
830 263 1071
830 27 490
830 291 606
830 453 774
830 268 501
830 322 681
830 262 560
830 478 801
830 444 678
830 468 537
830 81 368
830 155 1135
830 343 1116
835 257 552
835 308 1128
835 207 1332
835 478 782
835 126 1145
835 361 1248
835 288 543
835 331 1134
835 278 1100
835 431 1077
835 220 669
835 310 561
835 18 632
835 451 568
835 355 855
835 27 490
835 291 606
835 437 679
835 443 745
835 326 681
835 104 1119
835 147 1151
835 268 501
835 253 1089
835 466 808
835 64 1231
835 86 1250
835 81 368
835 440 787
840 407 706
840 241 1114
840 10 632
840 268 1121
840 114 1158
840 310 561
840 254 549
840 89 1130
840 348 837
840 454 820
840 74 1258
840 469 789
840 316 1160
840 27 490
840 291 606
840 427 1099
840 437 602
840 354 1238
840 291 1150
840 326 681
840 288 543
840 139 1160
840 269 502
840 81 368
840 52 1247
840 221 656
840 416 757
840 422 799
845 77 1139
845 399 721
845 344 1204
845 426 624
845 417 1129
845 80 368
845 256 1146
845 230 1136
845 439 829
845 342 818
845 43 1266
845 27 490
845 291 606
845 309 561
845 57 1274
845 279 1170
845 326 681
845 223 639
845 241 553
845 100 1174
845 288 543
845 124 1163
845 410 811
845 400 776
845 269 502
845 301 1180
845 449 803
850 396 828
850 109 1166
850 473 818
850 264 1187
850 218 1160
850 424 847
850 291 610
850 416 648
850 373 797
850 431 811
850 388 739
850 271 506
850 331 1184
850 83 367
850 290 1200
850 28 489
850 236 554
850 288 540
850 330 804
850 231 627
850 84 1184
850 326 681
850 315 554
850 245 1168
855 455 831
855 235 550
855 95 1164
855 383 839
855 414 828
855 73 1185
855 401 676
855 291 610
855 314 1154
855 211 1182
855 232 1196
855 239 616
855 83 367
855 275 1237
855 28 489
855 316 554
855 288 540
855 250 1214
855 264 511
855 329 791
855 326 681
855 381 753
855 357 814
855 408 859
860 59 1192
860 319 554
860 396 875
860 199 1203
860 371 766
860 398 845
860 220 1212
860 234 550
860 442 855
860 239 1240
860 291 610
860 83 367
860 80 1163
860 391 702
860 28 489
860 473 493
860 336 839
860 242 605
860 366 862
860 326 784
860 326 681
860 462 434
860 290 537
860 301 1133
860 260 1253
860 479 876
860 264 509
865 451 421
865 185 1231
865 248 1271
865 475 820
865 366 779
865 234 550
865 355 1211
865 291 610
865 462 901
865 383 889
865 428 872
865 83 367
865 316 856
865 388 860
865 28 489
865 69 1171
865 227 1250
865 207 1233
865 373 724
865 49 1196
865 320 549
865 291 532
865 351 879
865 322 780
865 326 681
865 251 594
865 285 1098
865 264 509
865 457 491
870 358 744
870 196 1257
870 287 531
870 330 1211
870 269 1064
870 234 550
870 357 793
870 301 881
870 442 410
870 411 886
870 291 610
870 449 921
870 262 509
870 81 367
870 469 387
870 216 1277
870 238 1291
870 28 489
870 337 892
870 462 847
870 175 1254
870 57 1189
870 39 1209
870 256 588
870 320 544
870 467 431
870 316 784
870 444 490
870 365 904
870 375 873
870 326 681
875 282 900
875 287 531
875 434 480
875 33 1217
875 312 794
875 251 1041
875 429 399
875 234 550
875 53 1201
875 435 818
875 319 1235
875 360 891
875 81 367
875 262 509
875 202 1298
875 185 1272
875 456 378
875 162 1292
875 28 489
875 335 754
875 226 1319
875 290 610
875 320 544
875 470 484
875 361 920
875 323 912
875 394 899
875 449 870
875 350 803
875 256 584
875 431 944
875 462 405
875 326 681
880 32 489
880 176 1280
880 432 474
880 217 1336
880 195 1303
880 449 364
880 85 367
880 411 833
880 438 887
880 261 575
880 153 1305
880 262 509
880 313 809
880 287 532
880 345 908
880 416 975
880 470 888
880 310 924
880 464 479
880 310 770
880 419 386
880 320 544
880 289 610
880 339 812
880 273 917
880 355 943
880 459 417
880 326 681
880 303 1267
880 382 921
880 230 999
880 235 549
885 406 997
885 299 939
885 289 610
885 260 575
885 31 489
885 326 826
885 409 360
885 285 1277
885 355 965
885 308 821
885 235 549
885 423 906
885 290 787
885 287 532
885 433 378
885 334 928
885 255 944
885 454 922
885 420 456
885 320 544
885 385 855
885 440 346
885 84 367
885 326 681
885 262 509
885 369 931
885 446 472
885 212 972
890 368 880
890 365 947
890 289 610
890 262 509
890 261 573
890 468 760
890 291 962
890 283 812
890 409 927
890 440 941
890 434 456
890 287 532
890 437 331
890 236 968
890 425 364
890 405 454
890 395 1014
890 320 544
890 235 549
890 325 944
890 405 339
890 355 989
890 84 367
890 326 681
890 303 846
890 30 489
890 324 826
890 193 938
895 289 610
895 309 967
895 442 774
895 264 828
895 429 316
895 428 969
895 399 321
895 284 980
895 358 957
895 422 436
895 262 509
895 262 573
895 447 435
895 397 429
895 316 852
895 287 532
895 184 912
895 220 993
895 435 525
895 320 544
895 415 349
895 235 549
895 387 1034
895 84 367
895 326 681
895 341 900
895 289 853
895 394 952
895 30 489
895 362 999
900 87 366
900 375 425
900 233 549
900 278 1002
900 171 886
900 260 506
900 30 484
900 469 525
900 424 302
900 318 549
900 353 964
900 253 848
900 407 333
900 286 531
900 374 1025
900 417 987
900 444 363
900 403 418
900 421 516
900 277 858
900 423 799
900 325 680
900 260 576
900 365 1062
900 205 1020
900 294 609
900 308 986
900 314 921
900 432 412
900 309 869
900 382 975
900 392 298
905 275 1015
905 293 941
905 30 484
905 391 396
905 233 549
905 408 501
905 267 877
905 260 506
905 416 395
905 325 680
905 413 276
905 465 408
905 286 531
905 404 1012
905 236 866
905 159 861
905 194 1041
905 357 410
905 453 522
905 387 280
905 83 366
905 359 1080
905 371 991
905 392 319
905 260 576
905 435 346
905 294 609
905 321 549
905 298 884
905 356 970
905 388 1043
905 408 818
905 298 1006
910 394 1022
910 275 961
910 286 531
910 378 262
910 233 549
910 397 840
910 378 297
910 229 882
910 260 506
910 30 484
910 261 887
910 433 509
910 451 378
910 355 1106
910 376 374
910 268 1036
910 400 368
910 82 366
910 290 609
910 372 976
910 398 482
910 348 391
910 154 821
910 403 261
910 290 897
910 422 325
910 325 680
910 463 324
910 260 576
910 359 1015
910 410 1055
910 321 549
910 466 362
910 291 1026
910 180 1064
915 363 361
915 233 549
915 368 280
915 260 506
915 30 484
915 345 1040
915 83 371
915 325 680
915 475 269
915 287 1050
915 399 240
915 438 347
915 146 794
915 417 486
915 333 373
915 259 980
915 290 609
915 420 307
915 262 1062
915 387 356
915 382 472
915 453 333
915 393 989
915 276 908
915 260 576
915 250 903
915 222 905
915 379 1047
915 285 531
915 321 549
915 384 862
915 426 1063
915 353 1124
915 374 248
915 170 1096
915 444 293
920 354 266
920 235 1025
920 348 346
920 376 450
920 375 886
920 233 549
920 409 1004
920 411 273
920 260 506
920 30 484
920 83 371
920 427 323
920 390 226
920 341 1155
920 325 347
920 285 1071
920 242 917
920 212 925
920 332 1059
920 258 1080
920 365 242
920 275 919
920 441 312
920 290 609
920 401 463
920 461 237
920 325 680
920 260 576
920 440 1060
920 432 258
920 140 774
920 321 549
920 362 1075
920 372 342
920 163 1114
920 285 531
925 453 211
925 425 1012
925 407 252
925 262 941
925 346 256
925 308 331
925 361 425
925 368 908
925 260 506
925 32 484
925 83 371
925 419 233
925 362 235
925 200 946
925 229 941
925 409 304
925 351 1095
925 432 287
925 335 324
925 256 1095
925 358 316
925 290 609
925 460 909
925 233 549
925 397 432
925 226 1056
925 260 576
925 334 1172
925 325 1083
925 285 531
925 134 748
925 321 549
925 448 1065
925 275 1091
925 379 205
925 154 1143
925 326 681
930 342 249
930 470 778
930 345 301
930 233 549
930 443 1029
930 325 681
930 260 506
930 250 1116
930 83 371
930 338 1116
930 371 192
930 311 1113
930 424 264
930 294 315
930 196 951
930 251 955
930 442 198
930 27 481
930 130 716
930 444 948
930 360 926
930 222 960
930 290 609
930 215 1093
930 395 280
930 450 1065
930 408 207
930 354 412
930 397 231
930 260 576
930 327 1187
930 272 1112
930 356 226
930 285 531
930 321 549
930 319 306
930 428 751
930 388 408
930 147 1173
935 142 1201
935 392 247
935 360 188
935 431 173
935 353 952
935 260 506
935 318 1193
935 386 211
935 355 228
935 383 385
935 328 286
935 83 371
935 268 1126
935 454 799
935 254 576
935 430 978
935 27 481
935 246 1127
935 473 815
935 189 961
935 290 609
935 455 1035
935 211 1119
935 304 1130
935 413 247
935 342 249
935 325 681
935 343 391
935 326 1141
935 304 286
935 386 778
935 388 173
935 281 297
935 127 690
935 321 549
935 249 976
935 213 978
935 450 1065
935 233 549
935 285 531
940 436 809
940 239 1150
940 290 268
940 264 1137
940 206 1156
940 427 150
940 384 143
940 260 506
940 267 283
940 83 371
940 355 228
940 322 1169
940 457 838
940 307 1209
940 324 681
940 347 804
940 237 997
940 254 576
940 386 226
940 203 992
940 27 481
940 320 547
940 297 1152
940 290 609
940 134 1238
940 349 184
940 374 368
940 381 186
940 455 1035
940 181 972
940 314 266
940 341 249
940 348 970
940 285 531
940 416 1014
940 122 663
940 450 1065
940 336 370
940 233 549
940 406 220
945 193 1018
945 27 481
945 390 114
945 299 1218
945 258 1157
945 233 549
945 260 506
945 377 164
945 83 371
945 331 355
945 355 228
945 324 681
945 339 250
945 403 1038
945 416 110
945 197 1186
945 333 180
945 259 566
945 115 636
945 255 272
945 231 1172
945 363 353
945 226 1016
945 424 837
945 308 1187
945 290 609
945 338 997
945 319 548
945 450 1065
945 287 1182
945 455 1035
945 321 833
945 277 247
945 440 860
945 377 195
945 170 1000
945 131 1273
945 303 246
945 393 200
945 285 531
950 273 1208
950 328 679
950 112 609
950 296 852
950 321 546
950 296 610
950 265 563
950 297 1214
950 331 342
950 368 173
950 325 1027
950 443 1037
950 423 877
950 450 1063
950 324 176
950 390 174
950 355 227
950 364 130
950 240 251
950 249 1180
950 190 1032
950 462 432
950 161 1012
950 214 1041
950 227 1177
950 195 1216
950 479 819
950 30 480
950 287 529
950 231 545
950 266 235
950 340 246
950 84 369
950 289 225
950 409 859
950 360 335
955 457 829
955 366 142
955 328 679
955 388 137
955 409 904
955 211 1200
955 321 546
955 262 1219
955 394 889
955 326 181
955 296 610
955 230 230
955 265 563
955 188 1037
955 450 1063
955 247 1193
955 208 1051
955 355 227
955 449 1037
955 157 1024
955 279 206
955 327 327
955 108 583
955 340 249
955 356 325
955 439 418
955 270 884
955 286 1237
955 30 480
955 256 223
955 287 529
955 231 545
955 320 1043
955 84 369
955 186 1248
960 424 398
960 328 679
960 353 117
960 378 915
960 321 546
960 438 852
960 203 1064
960 296 610
960 241 195
960 265 563
960 353 319
960 144 1049
960 450 1063
960 348 1139
960 181 1057
960 104 554
960 449 1037
960 241 1211
960 325 322
960 396 931
960 340 249
960 346 222
960 30 480
960 327 184
960 265 186
960 202 1216
960 213 213
960 316 1061
960 396 95
960 231 545
960 253 1256
960 287 529
960 272 1248
960 84 369
960 252 908
965 250 1265
965 195 1234
965 328 679
965 449 1037
965 321 546
965 200 192
965 265 563
965 309 1087
965 343 216
965 326 189
965 99 528
965 318 312
965 450 1063
965 239 1229
965 420 869
965 330 1171
965 464 431
965 173 1076
965 256 161
965 340 249
965 360 941
965 222 927
965 350 313
965 378 957
965 262 1276
965 135 1065
965 30 480
965 287 529
965 231 545
965 192 1083
965 399 387
965 229 174
965 295 610
965 84 369
965 254 513
970 309 1188
970 450 1063
970 328 679
970 449 1037
970 321 546
970 248 510
970 383 372
970 223 158
970 191 177
970 86 506
970 364 986
970 314 299
970 402 898
970 326 189
970 343 967
970 347 315
970 190 1098
970 296 1111
970 84 369
970 340 249
970 341 209
970 449 450
970 240 1278
970 188 1249
970 30 480
970 168 1086
970 287 529
970 231 545
970 266 563
970 128 1072
970 229 1247
970 271 626
970 239 138
970 198 955
970 477 746
975 449 1037
975 379 920
975 280 1209
975 26 480
975 185 1115
975 266 623
975 342 297
975 326 189
975 174 976
975 327 679
975 224 1252
975 264 563
975 355 1001
975 176 1268
975 336 243
975 229 1299
975 469 486
975 465 764
975 450 1063
975 341 209
975 249 503
975 161 1105
975 335 990
975 362 362
975 321 546
975 232 122
975 183 159
975 287 529
975 231 545
975 121 1092
975 78 481
975 284 1133
975 447 461
975 210 135
975 84 369
975 313 283
980 464 499
980 154 1129
980 198 109
980 114 1116
980 321 546
980 31 480
980 442 777
980 274 1162
980 363 942
980 326 189
980 321 1026
980 174 1136
980 302 264
980 327 679
980 152 984
980 337 276
980 64 459
980 449 1037
980 246 490
980 450 1063
980 341 209
980 222 1322
980 228 107
980 263 1225
980 171 1278
980 434 495
980 210 1291
980 287 529
980 231 545
980 260 626
980 333 238
980 340 344
980 267 563
980 174 138
980 84 369
980 339 1034
985 446 525
985 321 547
985 427 799
985 450 1063
985 341 961
985 149 1150
985 326 189
985 168 122
985 327 679
985 257 1260
985 253 630
985 165 1283
985 49 441
985 423 517
985 190 90
985 449 1037
985 199 1307
985 27 481
985 317 338
985 121 1024
985 313 1051
985 341 209
985 171 1149
985 284 252
985 214 1326
985 261 1180
985 333 1064
985 80 369
985 287 529
985 231 545
985 109 1126
985 333 238
985 236 490
985 267 563
985 221 80
985 328 259
985 477 436
990 321 547
990 182 71
990 327 679
990 29 475
990 301 1073
990 252 1202
990 296 319
990 407 817
990 313 249
990 242 1280
990 456 428
990 323 986
990 101 1138
990 449 1037
990 191 1316
990 340 209
990 157 102
990 143 1167
990 450 1063
990 411 538
990 94 1056
990 168 1174
990 39 420
990 80 369
990 242 631
990 166 1287
990 440 563
990 328 187
990 287 529
990 274 242
990 333 238
990 327 1084
990 267 563
990 227 485
990 210 56
990 228 545
995 242 1223
995 29 475
995 234 545
995 195 38
995 154 1292
995 333 238
995 296 1097
995 137 1187
995 386 836
995 287 529
995 327 679
995 290 222
995 169 1189
995 339 209
995 76 361
995 76 1079
995 320 547
995 450 1063
995 311 1117
995 429 582
995 429 421
995 97 1167
995 22 409
995 233 631
995 306 1018
995 403 572
995 257 225
995 146 69
995 168 45
995 276 305
995 267 563
995 221 485
995 328 187
995 449 1037
1000 446 1040
1000 284 1128
1000 340 211
1000 397 595
1000 151 16
1000 142 50
1000 222 1275
1000 444 1068
1000 335 241
1000 192 19
1000 281 197
1000 218 484
1000 424 399
1000 291 1040
1000 326 682
1000 287 524
1000 32 475
1000 136 1201
1000 57 1112
1000 247 201
1000 329 188
1000 254 289
1000 229 632
1000 76 367
1000 243 538
1000 265 564
1000 324 542
1000 96 1181
1000 425 603
1000 297 1151
1000 167 1207
1000 369 856
1005 446 1040
1005 340 211
1005 275 176
1005 285 1174
1005 243 538
1005 219 634
1005 272 1149
1005 231 484
1005 329 188
1005 143 0
1005 32 475
1005 349 875
1005 337 243
1005 276 1064
1005 287 524
1005 326 682
1005 213 1295
1005 96 1199
1005 236 180
1005 80 367
1005 237 271
1005 414 386
1005 419 630
1005 444 1068
1005 126 21
1005 163 1233
1005 40 1133
1005 265 564
1005 324 542
1005 386 613
1005 136 1217
1010 446 1040
1010 338 894
1010 80 367
1010 457 392
1010 136 1237
1010 411 654
1010 100 1229
1010 261 1183
1010 218 634
1010 444 1068
1010 267 151
1010 126 7
1010 225 160
1010 287 524
1010 337 243
1010 329 188
1010 340 209
1010 408 375
1010 465 331
1010 161 1256
1010 326 682
1010 32 475
1010 263 1099
1010 200 1305
1010 15 1165
1010 243 538
1010 265 564
1010 276 1202
1010 477 871
1010 381 640
1010 230 494
1010 325 545
1010 218 250
1015 446 1040
1015 248 1202
1015 214 138
1015 471 293
1015 243 538
1015 136 0
1015 193 1312
1015 244 487
1015 218 634
1015 444 1068
1015 133 1261
1015 99 1244
1015 164 1286
1015 269 1221
1015 32 475
1015 247 1122
1015 329 188
1015 468 809
1015 340 209
1015 80 367
1015 397 677
1015 463 348
1015 287 524
1015 444 366
1015 404 347
1015 463 889
1015 201 230
1015 320 921
1015 474 831
1015 265 564
1015 325 682
1015 319 552
1015 455 311
1015 336 238
1015 374 660
1015 257 128
1020 446 1040
1020 447 912
1020 163 1297
1020 468 853
1020 243 538
1020 446 285
1020 325 682
1020 429 340
1020 218 634
1020 335 238
1020 465 268
1020 404 328
1020 213 117
1020 134 1286
1020 287 524
1020 329 188
1020 247 492
1020 80 367
1020 391 701
1020 184 210
1020 446 322
1020 32 475
1020 247 106
1020 444 1068
1020 257 1242
1020 450 825
1020 340 209
1020 265 564
1020 104 1258
1020 319 552
1020 237 1150
1020 236 1229
1020 309 941
1020 367 687
1025 446 1040
1025 131 1303
1025 252 495
1025 116 1269
1025 325 682
1025 218 634
1025 335 238
1025 206 88
1025 236 79
1025 460 237
1025 376 725
1025 287 524
1025 436 271
1025 340 209
1025 436 847
1025 80 367
1025 451 872
1025 228 1171
1025 438 313
1025 32 475
1025 317 552
1025 444 1068
1025 431 932
1025 217 1245
1025 398 300
1025 246 1245
1025 455 452
1025 172 197
1025 419 315
1025 265 564
1025 160 1317
1025 242 538
1025 329 188
1025 353 706
1025 300 961
1030 446 1040
1030 29 475
1030 226 58
1030 240 538
1030 306 567
1030 444 1068
1030 133 1320
1030 390 281
1030 427 295
1030 218 634
1030 335 238
1030 345 729
1030 428 248
1030 205 70
1030 436 888
1030 230 1253
1030 282 988
1030 329 188
1030 452 219
1030 79 367
1030 255 497
1030 406 299
1030 371 746
1030 458 493
1030 160 1317
1030 207 1211
1030 287 523
1030 154 185
1030 340 209
1030 324 682
1030 118 1288
1030 265 564
1030 213 1250
1030 416 958
1030 441 440
1030 421 872
1035 26 481
1035 446 1040
1035 78 367
1035 139 155
1035 454 404
1035 117 1302
1035 306 567
1035 331 753
1035 268 1012
1035 384 256
1035 439 477
1035 444 1068
1035 361 775
1035 463 466
1035 405 975
1035 333 234
1035 407 893
1035 194 43
1035 329 188
1035 445 189
1035 407 262
1035 255 497
1035 417 920
1035 415 222
1035 287 523
1035 197 1228
1035 340 209
1035 324 682
1035 265 564
1035 427 421
1035 218 633
1035 430 261
1035 244 528
1040 26 481
1040 446 1040
1040 78 367
1040 393 997
1040 306 567
1040 412 405
1040 350 796
1040 329 188
1040 430 183
1040 397 249
1040 425 459
1040 217 633
1040 400 933
1040 382 233
1040 340 209
1040 408 202
1040 191 1246
1040 255 497
1040 118 1318
1040 428 237
1040 255 1037
1040 187 23
1040 287 523
1040 245 528
1040 395 916
1040 321 782
1040 334 234
1040 265 564
1040 449 449
1040 435 378
1040 324 682
1040 123 141
1040 443 1068
1045 26 481
1045 400 387
1045 446 1040
1045 410 443
1045 433 428
1045 417 172
1045 396 218
1045 340 209
1045 306 567
1045 379 206
1045 377 938
1045 384 1012
1045 442 1068
1045 245 528
1045 217 633
1045 406 184
1045 328 188
1045 318 806
1045 255 497
1045 243 1061
1045 287 523
1045 423 214
1045 76 367
1045 416 362
1045 391 953
1045 334 234
1045 265 564
1045 324 682
1045 340 826
1045 107 118
1050 390 188
1050 306 827
1050 327 680
1050 403 346
1050 332 235
1050 444 1076
1050 237 1084
1050 443 1040
1050 259 492
1050 88 102
1050 341 207
1050 393 428
1050 283 536
1050 304 568
1050 392 363
1050 221 632
1050 364 964
1050 406 183
1050 240 533
1050 365 189
1050 373 985
1050 259 564
1050 368 1040
1050 64 369
1050 331 847
1050 320 189
1050 415 414
1050 29 483
1055 372 406
1055 70 76
1055 359 1006
1055 61 369
1055 332 235
1055 348 981
1055 400 157
1055 229 1110
1055 444 1076
1055 281 534
1055 28 483
1055 259 492
1055 341 207
1055 220 632
1055 381 169
1055 260 566
1055 363 1060
1055 352 164
1055 380 347
1055 320 870
1055 403 388
1055 240 533
1055 443 1040
1055 392 329
1055 320 189
1055 326 680
1055 303 569
1055 295 850
1060 383 367
1060 433 1048
1060 312 892
1060 289 873
1060 332 235
1060 357 1082
1060 343 1034
1060 281 534
1060 28 483
1060 259 492
1060 359 382
1060 450 803
1060 220 632
1060 338 1006
1060 303 569
1060 366 149
1060 388 134
1060 55 56
1060 429 1076
1060 240 533
1060 56 369
1060 261 567
1060 353 119
1060 387 312
1060 337 143
1060 340 207
1060 320 189
1060 326 680
1060 361 328
1060 469 863
1060 222 1136
1065 213 1160
1065 342 1108
1065 285 893
1065 418 1082
1065 432 822
1065 463 888
1065 462 839
1065 421 1059
1065 259 492
1065 328 187
1065 220 632
1065 280 534
1065 352 131
1065 471 414
1065 377 303
1065 307 917
1065 27 483
1065 240 533
1065 326 1032
1065 49 373
1065 372 357
1065 261 567
1065 461 211
1065 349 363
1065 321 124
1065 340 207
1065 43 47
1065 326 680
1065 334 232
1065 303 569
1065 374 124
1065 338 1051
1065 344 312
1070 264 567
1070 425 839
1070 336 1125
1070 304 936
1070 454 404
1070 357 288
1070 444 854
1070 366 113
1070 42 373
1070 321 312
1070 259 492
1070 211 1181
1070 220 632
1070 280 534
1070 406 1066
1070 311 1058
1070 446 195
1070 404 1089
1070 27 483
1070 240 533
1070 328 1075
1070 452 915
1070 321 122
1070 328 187
1070 340 207
1070 284 914
1070 359 334
1070 326 680
1070 334 232
1070 303 569
1070 336 345
1075 264 567
1075 306 292
1075 40 373
1075 331 226
1075 347 319
1075 435 878
1075 330 1151
1075 315 1101
1075 454 946
1075 442 368
1075 259 492
1075 220 632
1075 280 534
1075 200 1215
1075 394 1104
1075 339 207
1075 386 1075
1075 298 967
1075 27 483
1075 299 1079
1075 240 533
1075 320 330
1075 284 933
1075 411 861
1075 333 273
1075 328 187
1075 470 335
1075 432 167
1075 326 680
1075 303 569
1080 264 567
1080 457 965
1080 333 298
1080 39 373
1080 316 1179
1080 285 278
1080 432 338
1080 311 310
1080 383 1130
1080 259 492
1080 464 307
1080 26 483
1080 427 143
1080 220 632
1080 301 985
1080 312 256
1080 339 207
1080 396 881
1080 327 226
1080 279 958
1080 422 902
1080 240 533
1080 190 1242
1080 291 1103
1080 313 1127
1080 327 187
1080 280 534
1080 326 680
1080 366 1089
1080 302 569
1085 264 567
1085 427 315
1085 301 569
1085 357 1105
1085 298 246
1085 282 1128
1085 183 1262
1085 453 993
1085 386 908
1085 455 276
1085 259 492
1085 310 1143
1085 26 483
1085 307 998
1085 220 632
1085 280 534
1085 338 207
1085 412 914
1085 40 373
1085 274 267
1085 372 1130
1085 294 290
1085 325 226
1085 313 282
1085 469 405
1085 451 810
1085 327 187
1085 464 840
1085 272 994
1085 326 680
1085 311 1193
1085 418 128
1085 127 1266
1085 245 535
1090 264 567
1090 342 1119
1090 298 1172
1090 282 226
1090 301 569
1090 321 223
1090 361 1148
1090 176 1279
1090 272 1013
1090 448 862
1090 306 262
1090 259 492
1090 26 483
1090 137 1249
1090 220 632
1090 373 928
1090 286 276
1090 338 207
1090 50 366
1090 260 249
1090 447 249
1090 460 1045
1090 433 832
1090 326 187
1090 402 936
1090 417 282
1090 471 346
1090 297 1212
1090 447 381
1090 306 1021
1090 280 534
1090 274 1153
1090 326 680
1090 245 535
1090 410 105
1095 251 225
1095 172 1307
1095 301 569
1095 440 220
1095 148 1222
1095 321 223
1095 54 368
1095 290 1191
1095 270 1037
1095 259 492
1095 26 483
1095 220 632
1095 326 1142
1095 338 207
1095 282 1221
1095 362 948
1095 418 855
1095 391 959
1095 278 257
1095 435 357
1095 304 1051
1095 326 187
1095 275 210
1095 410 253
1095 325 680
1095 294 247
1095 449 1038
1095 270 1174
1095 280 534
1095 347 1173
1095 427 874
1095 263 567
1095 245 535
1095 459 321
1100 267 1078
1100 231 193
1100 63 368
1100 450 1043
1100 29 485
1100 397 878
1100 281 216
1100 246 533
1100 327 189
1100 312 1166
1100 165 1359
1100 448 758
1100 380 985
1100 260 181
1100 74 1061
1100 307 1074
1100 264 563
1100 321 223
1100 157 1196
1100 354 971
1100 258 217
1100 327 677
1100 337 205
1100 396 219
1100 256 1200
1100 289 528
1100 442 288
1100 260 490
1100 423 327
1100 410 905
1100 218 631
1100 306 568
1105 267 1088
1105 248 1219
1105 276 197
1105 29 485
1105 385 899
1105 246 533
1105 384 199
1105 165 1359
1105 219 631
1105 289 528
1105 450 1048
1105 432 267
1105 264 563
1105 308 1084
1105 345 987
1105 414 306
1105 165 1180
1105 250 162
1105 321 222
1105 224 176
1105 305 1180
1105 72 1052
1105 398 925
1105 249 199
1105 326 187
1105 334 207
1105 373 1001
1105 260 490
1105 68 364
1105 431 777
1105 327 678
1105 306 568
1110 331 206
1110 29 485
1110 246 533
1110 402 274
1110 163 1381
1110 219 631
1110 289 528
1110 268 172
1110 80 1028
1110 75 360
1110 423 242
1110 322 179
1110 264 563
1110 453 1054
1110 308 1106
1110 260 490
1110 370 174
1110 410 801
1110 313 215
1110 240 143
1110 302 1191
1110 368 1025
1110 239 1251
1110 340 1016
1110 176 1152
1110 367 922
1110 215 153
1110 384 947
1110 236 172
1110 267 1112
1110 327 678
1110 306 568
1115 307 1124
1115 29 485
1115 315 171
1115 227 1264
1115 246 533
1115 354 1047
1115 219 631
1115 289 528
1115 294 1218
1115 228 150
1115 413 219
1115 319 200
1115 85 361
1115 453 1054
1115 390 249
1115 368 969
1115 267 1134
1115 264 563
1115 188 1131
1115 227 126
1115 353 948
1115 261 148
1115 203 134
1115 351 150
1115 83 1000
1115 301 209
1115 368 1001
1115 260 490
1115 306 568
1115 327 678
1115 383 825
1120 308 185
1120 306 1145
1120 29 485
1120 219 104
1120 294 1233
1120 246 533
1120 283 192
1120 341 967
1120 219 631
1120 289 528
1120 192 115
1120 329 132
1120 274 1147
1120 92 361
1120 320 1068
1120 453 1054
1120 304 161
1120 200 1108
1120 352 996
1120 264 563
1120 360 851
1120 86 973
1120 219 130
1120 353 1067
1120 398 194
1120 219 1299
1120 260 490
1120 249 125
1120 378 227
1120 327 678
1120 306 568
1125 180 94
1125 332 992
1125 29 485
1125 312 1163
1125 216 85
1125 272 177
1125 471 556
1125 279 1162
1125 382 175
1125 289 528
1125 214 1090
1125 368 198
1125 310 1092
1125 264 563
1125 219 630
1125 211 115
1125 453 1044
1125 219 1299
1125 304 143
1125 242 539
1125 289 170
1125 342 1019
1125 101 359
1125 332 873
1125 245 102
1125 86 949
1125 260 490
1125 347 1084
1125 327 678
1125 306 568
1130 451 1045
1130 341 1108
1130 227 1065
1130 280 150
1130 279 1179
1130 101 359
1130 259 155
1130 29 485
1130 315 1017
1130 460 560
1130 289 528
1130 318 1175
1130 302 1109
1130 177 79
1130 219 630
1130 197 93
1130 359 172
1130 242 539
1130 209 64
1130 307 897
1130 457 465
1130 378 147
1130 342 1028
1130 245 102
1130 86 949
1130 260 490
1130 291 130
1130 264 563
1130 327 678
1130 306 568
1135 107 364
1135 368 62
1135 243 133
1135 239 1049
1135 98 901
1135 29 485
1135 450 1045
1135 308 1035
1135 261 127
1135 289 528
1135 188 76
1135 328 1128
1135 61 976
1135 237 535
1135 264 563
1135 219 630
1135 289 1129
1135 282 1193
1135 324 1181
1135 464 404
1135 317 1064
1135 450 569
1135 439 456
1135 108 1035
1135 282 919
1135 340 147
1135 260 490
1135 168 59
1135 291 130
1135 327 678
1135 306 568
1140 417 437
1140 29 485
1140 284 1070
1140 450 1045
1140 221 98
1140 99 880
1140 289 528
1140 446 383
1140 127 1016
1140 264 563
1140 254 1023
1140 311 1155
1140 107 369
1140 253 103
1140 219 630
1140 259 941
1140 277 1150
1140 441 579
1140 237 535
1140 260 490
1140 439 427
1140 302 1092
1140 64 946
1140 327 678
1140 306 568
1145 275 1090
1145 267 1005
1145 29 485
1145 113 374
1145 450 1045
1145 289 528
1145 266 103
1145 434 368
1145 237 535
1145 228 982
1145 397 419
1145 264 563
1145 219 630
1145 101 855
1145 222 92
1145 147 990
1145 292 1111
1145 418 413
1145 426 589
1145 271 1164
1145 260 490
1145 64 946
1145 327 678
1145 306 568
1150 256 1190
1150 29 485
1150 113 374
1150 224 58
1150 450 1045
1150 411 338
1150 278 981
1150 289 528
1150 108 828
1150 421 604
1150 237 535
1150 457 324
1150 264 563
1150 219 630
1150 169 967
1150 399 389
1150 277 1131
1150 379 391
1150 328 681
1150 259 1118
1150 209 1004
1150 260 490
1150 276 1192
1150 64 946
1150 207 68
1150 306 568
1155 335 1212
1155 262 491
1155 69 879
1155 28 485
1155 243 1218
1155 263 567
1155 188 949
1155 265 1216
1155 327 1237
1155 210 32
1155 284 528
1155 300 575
1155 247 1140
1155 357 366
1155 220 633
1155 264 1157
1155 397 321
1155 116 372
1155 296 1227
1155 435 307
1155 414 611
1155 385 370
1155 241 531
1155 110 821
1155 324 677
1155 293 952
1155 192 43
1155 450 1052
1155 185 1024
1160 252 1179
1160 449 1050
1160 73 853
1160 344 343
1160 114 803
1160 220 629
1160 321 1211
1160 441 98
1160 213 929
1160 336 1202
1160 414 281
1160 33 487
1160 233 1163
1160 404 636
1160 306 569
1160 259 493
1160 368 336
1160 383 300
1160 307 934
1160 112 371
1160 326 680
1160 240 536
1160 263 563
1160 301 1219
1160 167 1043
1160 183 22
1160 286 528
1160 167 1271
1165 368 275
1165 324 920
1165 237 539
1165 327 317
1165 244 1205
1165 301 1205
1165 390 253
1165 251 499
1165 405 651
1165 438 133
1165 115 371
1165 139 1083
1165 329 677
1165 240 913
1165 293 521
1165 316 1215
1165 174 1242
1165 222 633
1165 305 570
1165 225 1182
1165 114 793
1165 355 315
1165 337 1216
1165 263 563
1165 73 836
1165 30 481
1170 337 1216
1170 237 539
1170 217 1207
1170 72 808
1170 301 1205
1170 251 499
1170 296 521
1170 377 230
1170 438 133
1170 261 896
1170 119 1098
1170 329 677
1170 113 793
1170 365 251
1170 338 295
1170 310 290
1170 222 633
1170 113 371
1170 449 1059
1170 305 570
1170 399 669
1170 335 898
1170 263 563
1170 317 1215
1170 233 1225
1170 178 1223
1170 30 481
1175 96 1126
1175 30 481
1175 301 1205
1175 380 94
1175 398 685
1175 297 267
1175 325 259
1175 251 499
1175 204 1231
1175 364 205
1175 329 677
1175 296 521
1175 221 1253
1175 438 133
1175 352 221
1175 279 888
1175 222 633
1175 184 1203
1175 449 1059
1175 305 570
1175 109 783
1175 112 371
1175 317 1215
1175 263 563
1175 349 880
1175 337 1216
1175 236 539
1175 76 795
1180 321 677
1180 348 198
1180 30 481
1180 214 1292
1180 450 1059
1180 285 245
1180 366 856
1180 251 499
1180 221 633
1180 235 539
1180 194 1180
1180 200 1256
1180 75 1156
1180 302 868
1180 300 1205
1180 384 94
1180 315 239
1180 470 457
1180 305 570
1180 295 521
1180 401 720
1180 111 771
1180 313 1215
1180 78 776
1180 112 371
1180 442 144
1180 263 563
1180 336 1216
1180 352 172
1185 321 677
1185 312 1215
1185 29 481
1185 323 859
1185 388 94
1185 108 755
1185 448 142
1185 306 207
1185 251 499
1185 221 633
1185 262 563
1185 78 758
1185 204 1166
1185 450 1059
1185 54 1178
1185 112 371
1185 203 1305
1185 295 521
1185 305 570
1185 300 1205
1185 467 415
1185 379 838
1185 334 173
1185 340 142
1185 337 1216
1185 186 1281
1185 401 730
1185 448 446
1185 235 539
1185 274 216
1190 337 1216
1190 260 565
1190 179 1295
1190 330 121
1190 312 1215
1190 395 819
1190 251 499
1190 446 167
1190 221 633
1190 235 539
1190 403 748
1190 434 434
1190 37 1199
1190 346 845
1190 264 187
1190 217 1139
1190 449 400
1190 319 672
1190 292 175
1190 295 521
1190 305 570
1190 390 97
1190 450 1059
1190 112 371
1190 450 897
1190 195 1322
1190 28 481
1190 298 1205
1190 107 735
1190 323 144
1190 79 738
1195 428 939
1195 260 565
1195 394 759
1195 84 711
1195 373 822
1195 414 807
1195 426 386
1195 221 633
1195 235 539
1195 304 570
1195 283 151
1195 231 1127
1195 452 178
1195 319 672
1195 298 1205
1195 323 115
1195 27 481
1195 116 712
1195 300 521
1195 308 1218
1195 390 97
1195 450 1059
1195 112 371
1195 337 1216
1195 258 499
1195 311 124
1195 408 410
1195 254 158
1200 448 211
1200 260 565
1200 437 787
1200 475 819
1200 450 1059
1200 299 93
1200 217 629
1200 335 1216
1200 117 689
1200 235 539
1200 245 127
1200 272 124
1200 401 970
1200 244 1113
1200 394 821
1200 410 376
1200 391 776
1200 319 672
1200 298 1205
1200 27 481
1200 300 521
1200 112 371
1200 258 499
1200 310 1218
1200 398 393
1200 390 102
1200 89 687
1200 304 570
1205 233 98
1205 289 532
1205 397 354
1205 317 674
1205 455 1056
1205 110 372
1205 390 90
1205 479 844
1205 219 630
1205 378 367
1205 304 1221
1205 261 97
1205 303 568
1205 458 778
1205 238 537
1205 92 664
1205 261 490
1205 416 809
1205 298 1216
1205 263 562
1205 450 229
1205 459 838
1205 120 662
1205 337 1241
1205 26 481
1205 386 1002
1205 379 791
1205 254 1081
1210 452 1055
1210 302 1215
1210 29 481
1210 452 235
1210 265 564
1210 443 797
1210 479 869
1210 217 634
1210 372 806
1210 292 1207
1210 360 353
1210 332 1203
1210 262 1066
1210 258 495
1210 224 69
1210 314 678
1210 304 573
1210 111 371
1210 238 530
1210 450 870
1210 290 533
1210 381 325
1210 369 1025
1210 96 641
1210 469 870
1210 128 637
1215 452 1055
1215 290 533
1215 29 481
1215 347 329
1215 367 814
1215 352 1056
1215 265 564
1215 455 888
1215 278 1044
1215 217 634
1215 292 1207
1215 258 495
1215 98 612
1215 305 571
1215 238 530
1215 314 678
1215 431 884
1215 333 1203
1215 128 609
1215 456 259
1215 467 794
1215 111 371
1215 218 39
1215 371 308
1215 474 900
1215 303 1215
1220 29 481
1220 332 304
1220 356 284
1220 265 564
1220 361 830
1220 290 533
1220 464 944
1220 217 634
1220 439 916
1220 292 1207
1220 258 495
1220 479 786
1220 420 909
1220 136 580
1220 304 1215
1220 451 1055
1220 315 674
1220 304 569
1220 333 1203
1220 456 259
1220 287 1033
1220 111 371
1220 101 588
1220 237 530
1220 330 1084
1225 139 550
1225 290 533
1225 452 952
1225 219 634
1225 103 567
1225 237 530
1225 304 1215
1225 459 270
1225 292 1207
1225 258 495
1225 404 925
1225 429 932
1225 301 1006
1225 316 276
1225 310 1113
1225 110 371
1225 315 674
1225 479 642
1225 333 1203
1225 304 569
1225 451 1055
1225 265 564
1225 348 260
1225 31 481
1225 352 838
1230 290 533
1230 333 239
1230 109 371
1230 418 955
1230 219 634
1230 305 257
1230 265 564
1230 394 957
1230 160 1256
1230 439 975
1230 315 994
1230 258 495
1230 146 521
1230 287 1141
1230 333 1203
1230 304 1215
1230 460 271
1230 315 674
1230 479 642
1230 343 846
1230 451 1055
1230 107 541
1230 304 569
1230 240 530
1230 292 1207
1230 31 481
1235 109 371
1235 335 1211
1235 219 634
1235 156 490
1235 265 564
1235 305 1215
1235 270 1173
1235 461 272
1235 258 495
1235 321 215
1235 112 510
1235 403 977
1235 295 234
1235 315 674
1235 479 642
1235 331 847
1235 379 969
1235 451 1055
1235 330 969
1235 289 533
1235 304 569
1235 423 997
1235 240 530
1235 292 1207
1235 31 481
1235 173 1231
1240 109 371
1240 335 1211
1240 219 634
1240 265 564
1240 305 1215
1240 459 270
1240 407 1023
1240 367 999
1240 240 530
1240 123 487
1240 391 998
1240 253 1200
1240 284 207
1240 315 674
1240 479 642
1240 162 465
1240 350 948
1240 184 1204
1240 451 1055
1240 322 854
1240 292 1207
1240 289 533
1240 304 569
1240 258 495
1240 31 481
1240 310 184
1245 109 371
1245 335 1211
1245 265 564
1245 270 180
1245 220 635
1245 377 1017
1245 258 495
1245 167 432
1245 307 1215
1245 461 270
1245 233 1230
1245 357 1022
1245 193 1180
1245 31 481
1245 315 674
1245 479 642
1245 135 463
1245 393 1047
1245 300 159
1245 451 1055
1245 292 1207
1245 289 533
1245 358 935
1245 304 569
1245 240 530
1245 311 855
1250 173 396
1250 109 371
1250 371 1070
1250 302 857
1250 479 647
1250 359 1043
1250 292 1207
1250 258 495
1250 220 635
1250 215 1251
1250 264 563
1250 260 150
1250 333 1211
1250 143 439
1250 205 1150
1250 351 1033
1250 315 674
1250 304 569
1250 291 134
1250 451 1055
1250 381 917
1250 289 533
1250 30 481
1250 240 530
1250 306 1215
1250 460 270
1255 396 890
1255 344 1066
1255 220 635
1255 479 647
1255 176 367
1255 292 1207
1255 258 495
1255 360 1085
1255 283 107
1255 264 563
1255 218 1124
1255 147 409
1255 333 1211
1255 304 1215
1255 251 121
1255 323 1065
1255 110 371
1255 315 674
1255 304 569
1255 462 270
1255 451 1055
1255 289 533
1255 30 481
1255 290 860
1255 240 530
1255 194 1282
1260 267 86
1260 109 371
1260 333 1211
1260 241 92
1260 181 340
1260 305 1215
1260 293 1207
1260 220 635
1260 231 1097
1260 479 647
1260 258 495
1260 281 864
1260 414 874
1260 264 563
1260 151 386
1260 348 1107
1260 331 1086
1260 315 674
1260 304 569
1260 462 270
1260 316 1076
1260 239 530
1260 451 1055
1260 289 533
1260 30 481
1265 451 455
1265 446 1072
1265 287 532
1265 305 1215
1265 293 1207
1265 479 647
1265 258 495
1265 184 312
1265 272 866
1265 456 873
1265 153 355
1265 264 563
1265 333 1211
1265 293 1101
1265 243 1077
1265 315 674
1265 304 569
1265 228 70
1265 462 270
1265 257 70
1265 239 530
1265 329 1124
1265 30 481
1265 311 1104
1265 222 631
1265 108 371
1265 428 854
1270 256 1042
1270 434 439
1270 287 532
1270 259 492
1270 274 1122
1270 479 647
1270 153 324
1270 442 1090
1270 445 817
1270 332 1211
1270 262 865
1270 264 563
1270 292 1206
1270 316 1141
1270 315 674
1270 304 569
1270 462 270
1270 239 530
1270 185 281
1270 296 1119
1270 30 481
1270 303 1215
1270 222 631
1270 108 371
1270 433 887
1275 332 1211
1275 423 423
1275 146 297
1275 33 478
1275 292 1206
1275 429 1112
1275 461 270
1275 265 567
1275 303 1215
1275 286 532
1275 475 847
1275 188 253
1275 299 1157
1275 264 478
1275 413 900
1275 478 647
1275 315 674
1275 304 569
1275 459 799
1275 239 530
1275 267 1028
1275 255 872
1275 222 631
1275 282 1140
1275 108 371
1275 256 1139
1280 461 871
1280 185 220
1280 410 401
1280 33 478
1280 238 1163
1280 265 567
1280 303 1215
1280 478 794
1280 461 270
1280 329 1211
1280 285 1169
1280 249 874
1280 478 647
1280 143 268
1280 260 478
1280 394 921
1280 283 995
1280 424 1133
1280 239 530
1280 315 674
1280 286 532
1280 290 1203
1280 303 569
1280 222 631
1280 108 371
1280 271 1155
1285 33 478
1285 328 1211
1285 289 1193
1285 259 478
1285 107 371
1285 243 865
1285 265 567
1285 286 532
1285 461 270
1285 404 378
1285 222 631
1285 297 977
1285 478 647
1285 246 1180
1285 264 1184
1285 223 1182
1285 315 674
1285 416 1148
1285 239 530
1285 301 1215
1285 190 188
1285 379 945
1285 303 569
1285 140 233
1285 442 883
1285 140 1137
1290 209 1202
1290 289 1193
1290 313 953
1290 107 371
1290 319 1211
1290 402 356
1290 297 1215
1290 265 484
1290 286 532
1290 461 270
1290 151 1121
1290 364 970
1290 410 1185
1290 256 1211
1290 182 159
1290 237 866
1290 137 208
1290 27 478
1290 315 674
1290 239 530
1290 264 567
1290 303 569
1290 239 1198
1290 222 631
1290 478 647
1290 421 911
1295 312 1213
1295 326 931
1295 107 371
1295 185 131
1295 349 990
1295 403 928
1295 268 491
1295 397 335
1295 286 532
1295 397 1188
1295 234 1224
1295 478 647
1295 132 173
1295 237 866
1295 202 1217
1295 27 478
1295 315 674
1295 164 1098
1295 288 1193
1295 239 530
1295 264 567
1295 280 1248
1295 303 569
1295 243 1232
1295 222 631
1295 460 270
1300 319 674
1300 218 1244
1300 288 1200
1300 107 371
1300 286 532
1300 396 316
1300 479 647
1300 461 270
1300 268 491
1300 330 1010
1300 384 953
1300 479 839
1300 340 908
1300 182 98
1300 387 1210
1300 473 394
1300 187 1252
1300 301 1221
1300 237 866
1300 27 478
1300 173 1076
1300 239 530
1300 264 567
1300 243 1262
1300 278 1249
1300 136 145
1300 303 569
1300 222 631
1305 319 674
1305 315 1033
1305 376 1239
1305 208 1276
1305 354 877
1305 470 853
1305 287 532
1305 391 303
1305 479 647
1305 268 491
1305 276 1249
1305 134 117
1305 287 1197
1305 238 866
1305 233 1282
1305 106 371
1305 299 1223
1305 27 478
1305 183 1059
1305 463 396
1305 239 530
1305 360 968
1305 264 567
1305 463 270
1305 183 1269
1305 303 569
1305 186 78
1305 222 631
1310 201 1295
1310 110 368
1310 293 532
1310 221 631
1310 293 1063
1310 134 88
1310 267 500
1310 274 1249
1310 181 1298
1310 287 1197
1310 318 674
1310 339 994
1310 229 1312
1310 196 1039
1310 242 865
1310 27 478
1310 456 863
1310 304 569
1310 462 395
1310 462 270
1310 366 862
1310 387 300
1310 264 567
1310 478 646
1310 184 55
1310 240 530
1310 362 1245
1310 298 1226
1315 109 368
1315 314 1010
1315 221 631
1315 446 878
1315 384 300
1315 347 1275
1315 287 1197
1315 318 677
1315 378 847
1315 281 1258
1315 292 532
1315 266 500
1315 27 478
1315 462 269
1315 304 569
1315 206 1019
1315 132 61
1315 264 567
1315 241 530
1315 478 646
1315 177 20
1315 282 1075
1315 237 852
1315 467 387
1315 271 1249
1320 270 1249
1320 296 1033
1320 459 375
1320 380 298
1320 276 1094
1320 292 532
1320 112 368
1320 331 1285
1320 236 849
1320 287 1197
1320 435 893
1320 219 999
1320 126 27
1320 266 500
1320 27 478
1320 462 269
1320 304 569
1320 220 633
1320 264 567
1320 241 530
1320 478 646
1320 397 821
1320 318 677
1320 277 1258
1325 124 0
1325 323 677
1325 461 269
1325 427 902
1325 241 530
1325 276 1258
1325 372 298
1325 256 1117
1325 112 368
1325 227 982
1325 445 355
1325 287 1197
1325 220 633
1325 265 500
1325 291 532
1325 27 478
1325 304 569
1325 412 791
1325 479 654
1325 268 1253
1325 264 567
1325 317 1290
1325 243 847
1325 277 1055
1330 267 1077
1330 269 570
1330 461 269
1330 253 831
1330 372 298
1330 306 1297
1330 285 1197
1330 240 530
1330 478 654
1330 219 633
1330 241 1151
1330 111 368
1330 266 500
1330 27 478
1330 290 532
1330 262 1253
1330 276 1258
1330 416 914
1330 479 817
1330 241 961
1330 304 569
1330 436 335
1330 429 776
1330 322 677
1335 269 570
1335 461 269
1335 372 298
1335 255 1104
1335 285 1305
1335 421 303
1335 262 820
1335 474 824
1335 285 1197
1335 478 654
1335 219 633
1335 108 368
1335 265 500
1335 444 759
1335 226 1174
1335 304 569
1335 404 928
1335 274 1258
1335 290 533
1335 26 478
1335 240 530
1335 261 1253
1335 257 950
1335 322 677
1340 320 677
1340 461 269
1340 373 297
1340 277 1314
1340 442 485
1340 455 733
1340 25 478
1340 214 1195
1340 391 938
1340 219 633
1340 265 500
1340 305 569
1340 250 1261
1340 277 823
1340 107 368
1340 479 654
1340 273 1261
1340 286 1198
1340 408 285
1340 274 939
1340 470 838
1340 290 533
1340 240 530
1340 244 1132
1340 269 568
1340 472 872
1340 427 525
1345 396 247
1345 425 491
1345 320 677
1345 461 269
1345 290 1279
1345 195 1221
1345 290 821
1345 479 654
1345 278 1198
1345 266 500
1345 235 1160
1345 219 633
1345 467 855
1345 305 569
1345 372 297
1345 27 482
1345 460 888
1345 107 368
1345 382 955
1345 470 718
1345 239 531
1345 288 920
1345 412 513
1345 288 533
1345 269 568
1345 249 1261
1350 320 677
1350 461 269
1350 272 1211
1350 306 915
1350 416 485
1350 289 1279
1350 266 500
1350 447 909
1350 184 1238
1350 219 633
1350 299 816
1350 305 569
1350 372 297
1350 27 482
1350 375 224
1350 372 966
1350 404 503
1350 464 874
1350 107 368
1350 479 654
1350 239 531
1350 465 385
1350 288 533
1350 269 568
1350 227 1190
1350 249 1261
1355 461 269
1355 402 477
1355 373 297
1355 316 899
1355 107 368
1355 463 891
1355 247 1264
1355 170 1262
1355 289 1279
1355 285 533
1355 219 633
1355 359 980
1355 305 569
1355 266 500
1355 390 498
1355 320 679
1355 447 359
1355 479 654
1355 26 482
1355 217 1221
1355 432 912
1355 366 198
1355 239 531
1355 314 826
1355 265 1223
1355 269 568
1360 161 1275
1360 461 269
1360 421 935
1360 354 168
1360 208 1245
1360 323 831
1360 479 654
1360 289 1279
1360 222 637
1360 329 888
1360 322 679
1360 285 533
1360 26 482
1360 460 921
1360 106 368
1360 430 342
1360 305 569
1360 266 500
1360 348 987
1360 384 465
1360 376 490
1360 239 531
1360 251 1269
1360 265 1223
1360 269 568
1360 373 297
1365 378 457
1365 416 327
1365 362 478
1365 261 1225
1365 220 644
1365 408 953
1365 369 297
1365 336 996
1365 478 653
1365 322 679
1365 285 533
1365 26 482
1365 341 877
1365 454 946
1365 251 1269
1365 305 569
1365 266 500
1365 287 1279
1365 462 269
1365 344 144
1365 201 1266
1365 452 516
1365 334 831
1365 108 368
1365 239 531
1365 146 1297
1365 269 568
1370 431 503
1370 332 118
1370 325 1004
1370 361 453
1370 135 1307
1370 252 1269
1370 223 641
1370 321 679
1370 394 970
1370 478 653
1370 257 1237
1370 108 368
1370 286 1279
1370 191 1295
1370 305 569
1370 266 500
1370 27 482
1370 462 269
1370 365 290
1370 241 531
1370 401 305
1370 348 466
1370 284 533
1370 358 861
1370 446 977
1370 328 850
1370 269 568
1375 461 269
1375 263 1287
1375 284 533
1375 362 281
1375 248 1269
1375 380 856
1375 332 867
1375 242 531
1375 448 1004
1375 345 437
1375 321 679
1375 478 653
1375 268 568
1375 286 1279
1375 305 569
1375 266 500
1375 27 482
1375 410 503
1375 308 1013
1375 470 815
1375 385 983
1375 331 450
1375 108 368
1375 392 286
1375 220 641
1380 371 1005
1380 444 1022
1380 339 880
1380 343 434
1380 393 498
1380 242 531
1380 391 832
1380 457 840
1380 478 653
1380 322 679
1380 356 275
1380 268 568
1380 283 1279
1380 305 569
1380 266 500
1380 27 482
1380 322 443
1380 107 368
1380 247 1269
1380 299 1023
1380 269 1298
1380 284 533
1380 225 637
1380 386 271
1380 460 269
1385 342 895
1385 276 1301
1385 347 249
1385 364 1028
1385 267 500
1385 305 569
1385 242 531
1385 436 860
1385 321 679
1385 478 653
1385 240 1277
1385 267 568
1385 459 269
1385 372 489
1385 438 1040
1385 107 368
1385 267 1298
1385 26 482
1385 288 1030
1385 284 533
1385 400 823
1385 224 637
1385 330 437
1385 377 246
1385 308 442
1390 280 1332
1390 356 484
1390 358 1051
1390 459 269
1390 242 531
1390 267 502
1390 232 1292
1390 321 679
1390 478 653
1390 267 568
1390 108 368
1390 353 912
1390 276 1046
1390 348 233
1390 412 870
1390 369 222
1390 438 1053
1390 31 472
1390 303 442
1390 305 569
1390 315 450
1390 284 533
1390 224 637
1390 410 797
1390 265 1297
1395 343 477
1395 293 444
1395 477 653
1395 346 213
1395 389 884
1395 242 531
1395 267 502
1395 107 362
1395 262 1297
1395 321 679
1395 267 568
1395 363 929
1395 440 1059
1395 459 269
1395 291 461
1395 346 1072
1395 30 472
1395 304 569
1395 278 1340
1395 222 1303
1395 261 1046
1395 416 777
1395 284 533
1395 361 200
1395 224 637
1400 218 1313
1400 358 176
1400 268 1353
1400 376 945
1400 276 448
1400 479 640
1400 242 531
1400 249 1051
1400 321 679
1400 285 533
1400 267 568
1400 104 362
1400 459 269
1400 249 1332
1400 267 504
1400 337 191
1400 30 472
1400 304 569
1400 342 1088
1400 364 898
1400 202 864
1400 274 470
1400 329 476
1400 423 754
1400 441 1065
1400 224 637
1400 175 848
1405 103 362
1405 253 479
1405 461 269
1405 286 533
1405 238 1349
1405 356 153
1405 201 829
1405 435 1065
1405 468 842
1405 478 642
1405 268 504
1405 224 637
1405 207 1338
1405 345 917
1405 268 568
1405 436 740
1405 320 161
1405 334 1104
1405 30 472
1405 304 569
1405 255 1380
1405 250 461
1405 309 464
1405 323 679
1405 226 860
1405 238 1052
1405 239 531
1405 386 963
1410 330 1111
1410 344 135
1410 435 1065
1410 327 935
1410 447 861
1410 228 823
1410 394 978
1410 268 504
1410 242 1389
1410 224 637
1410 461 270
1410 293 460
1410 239 498
1410 268 568
1410 227 1059
1410 455 735
1410 228 471
1410 254 853
1410 30 472
1410 479 642
1410 469 902
1410 226 1367
1410 104 362
1410 239 531
1410 289 533
1410 323 679
1410 304 569
1410 315 139
1410 197 1355
1415 403 993
1415 333 105
1415 305 115
1415 267 508
1415 435 1065
1415 219 1064
1415 219 513
1415 310 949
1415 224 637
1415 461 270
1415 474 726
1415 202 480
1415 268 568
1415 256 809
1415 336 1116
1415 469 844
1415 274 851
1415 30 472
1415 304 569
1415 442 918
1415 275 455
1415 104 362
1415 239 531
1415 289 533
1415 323 679
1415 479 642
1415 420 879
1420 27 472
1420 213 528
1420 344 1125
1420 297 96
1420 282 804
1420 413 1006
1420 454 872
1420 478 642
1420 287 533
1420 224 637
1420 400 890
1420 305 834
1420 461 270
1420 436 1065
1420 193 501
1420 295 984
1420 268 568
1420 265 507
1420 304 569
1420 422 937
1420 258 449
1420 239 531
1420 323 679
1420 105 362
1420 209 1069
1425 27 472
1425 422 1018
1425 465 264
1425 438 1065
1425 287 533
1425 310 793
1425 346 1125
1425 224 637
1425 283 1008
1425 401 952
1425 322 679
1425 268 568
1425 265 507
1425 241 531
1425 179 522
1425 198 1072
1425 304 569
1425 441 904
1425 330 824
1425 377 917
1425 199 546
1425 104 362
1425 238 448
1425 472 647
1430 219 442
1430 357 1130
1430 265 502
1430 438 1065
1430 360 941
1430 287 533
1430 28 472
1430 174 551
1430 355 818
1430 322 679
1430 190 576
1430 268 568
1430 186 1082
1430 381 966
1430 474 272
1430 427 930
1430 461 647
1430 304 569
1430 335 792
1430 241 531
1430 104 362
1430 432 1021
1430 224 637
1430 278 1033
1435 264 502
1435 183 595
1435 201 442
1435 165 578
1435 287 533
1435 28 472
1435 322 679
1435 361 776
1435 436 1067
1435 268 568
1435 343 959
1435 304 569
1435 377 812
1435 268 1061
1435 241 531
1435 104 362
1435 440 1032
1435 413 962
1435 176 1088
1435 224 637
1435 359 984
1435 458 647
1435 361 1130
1435 479 281
1440 264 502
1440 179 435
1440 28 472
1440 265 1084
1440 287 533
1440 390 760
1440 403 803
1440 322 679
1440 436 1067
1440 268 568
1440 458 647
1440 397 993
1440 178 620
1440 304 569
1440 158 610
1440 366 1130
1440 346 1004
1440 241 531
1440 104 362
1440 445 1038
1440 165 1101
1440 326 991
1440 224 637
1445 264 502
1445 413 759
1445 423 1084
1445 158 1115
1445 309 1009
1445 150 633
1445 428 788
1445 287 533
1445 258 1112
1445 329 1025
1445 322 679
1445 175 629
1445 268 568
1445 454 1039
1445 30 472
1445 304 569
1445 382 1024
1445 460 638
1445 241 531
1445 104 362
1445 366 1130
1445 224 637
1445 159 432
1450 452 1039
1450 264 502
1450 319 1052
1450 151 1131
1450 368 1053
1450 144 651
1450 287 533
1450 224 637
1450 291 1033
1450 268 568
1450 418 1099
1450 169 670
1450 140 423
1450 31 472
1450 460 638
1450 241 531
1450 104 362
1450 437 744
1450 250 1143
1450 323 680
1450 303 569
1450 446 778
1450 367 1128
1455 264 502
1455 367 1125
1455 164 693
1455 277 1053
1455 287 533
1455 351 1089
1455 142 683
1455 405 1130
1455 458 753
1455 264 568
1455 323 680
1455 245 1166
1455 458 730
1455 31 472
1455 147 1145
1455 460 638
1455 240 531
1455 104 362
1455 302 1073
1455 120 411
1455 303 569
1455 224 637
1455 453 1044
1460 264 502
1460 286 533
1460 164 722
1460 477 729
1460 465 639
1460 451 1049
1460 138 1162
1460 224 637
1460 263 1081
1460 232 1193
1460 100 406
1460 264 568
1460 323 680
1460 338 1117
1460 476 853
1460 291 1098
1460 31 472
1460 104 362
1460 359 1134
1460 239 531
1460 393 1140
1460 303 569
1460 142 709
1460 478 759
1465 286 533
1465 343 1145
1465 227 1220
1465 265 502
1465 451 1049
1465 134 1180
1465 85 404
1465 264 568
1465 141 737
1465 104 362
1465 31 472
1465 222 640
1465 240 531
1465 158 752
1465 380 1160
1465 323 680
1465 464 872
1465 249 1105
1465 303 569
1465 321 1141
1465 463 638
1465 277 1119
1470 264 502
1470 286 533
1470 156 775
1470 215 1242
1470 334 1164
1470 139 766
1470 304 1168
1470 451 1044
1470 31 478
1470 264 568
1470 265 1143
1470 104 362
1470 236 1134
1470 70 398
1470 222 640
1470 371 1180
1470 323 680
1470 445 888
1470 129 1197
1470 303 569
1470 239 531
1470 463 638
1475 286 533
1475 473 770
1475 462 638
1475 326 1177
1475 137 793
1475 203 1267
1475 263 502
1475 154 802
1475 240 531
1475 58 390
1475 264 568
1475 361 1204
1475 430 910
1475 222 640
1475 251 1169
1475 126 1204
1475 289 1194
1475 218 1161
1475 105 363
1475 323 680
1475 303 569
1475 454 1045
1475 31 478
1480 135 814
1480 153 824
1480 415 927
1480 28 483
1480 462 638
1480 197 1290
1480 352 1228
1480 303 569
1480 263 502
1480 122 1221
1480 285 533
1480 264 568
1480 239 1192
1480 48 377
1480 447 757
1480 273 1218
1480 224 640
1480 240 531
1480 312 1189
1480 105 363
1480 323 680
1480 454 1045
1480 214 1185
1485 462 638
1485 254 1235
1485 28 483
1485 222 640
1485 152 839
1485 132 836
1485 303 569
1485 302 1205
1485 263 502
1485 227 1222
1485 285 533
1485 264 568
1485 39 369
1485 343 1248
1485 187 1319
1485 114 1242
1485 415 744
1485 475 869
1485 240 531
1485 198 1213
1485 105 363
1485 323 680
1485 401 951
1485 454 1045
1490 176 1345
1490 465 883
1490 129 863
1490 28 483
1490 31 361
1490 241 531
1490 189 1240
1490 289 1225
1490 109 1259
1490 263 502
1490 456 1043
1490 285 533
1490 264 568
1490 148 867
1490 462 639
1490 382 736
1490 386 969
1490 223 637
1490 243 1274
1490 105 363
1490 323 680
1490 329 1264
1490 303 569
1490 215 1243
1495 345 731
1495 264 504
1495 28 483
1495 290 533
1495 145 903
1495 206 1273
1495 223 637
1495 264 568
1495 458 1040
1495 374 989
1495 182 1259
1495 241 531
1495 282 1241
1495 462 639
1495 314 1282
1495 25 359
1495 128 889
1495 105 363
1495 323 680
1495 450 905
1495 114 1265
1495 303 569
1495 229 1301
1500 303 1308
1500 264 504
1500 368 1008
1500 28 483
1500 122 924
1500 311 720
1500 141 931
1500 264 568
1500 241 531
1500 19 359
1500 218 1334
1500 454 1042
1500 462 639
1500 105 363
1500 116 1288
1500 223 637
1500 267 1266
1500 323 680
1500 290 533
1500 303 569
1500 192 1298
1500 165 1295
1500 434 929
1505 264 504
1505 139 957
1505 28 483
1505 240 531
1505 184 1320
1505 277 711
1505 264 568
1505 18 359
1505 454 1042
1505 462 639
1505 159 1305
1505 349 1036
1505 120 949
1505 105 363
1505 289 1320
1505 415 951
1505 223 637
1505 254 1278
1505 116 1292
1505 323 680
1505 290 533
1505 303 569
1505 203 1359
1510 339 1059
1510 454 1042
1510 462 639
1510 112 976
1510 27 483
1510 105 363
1510 174 1336
1510 112 1303
1510 223 637
1510 278 1325
1510 262 568
1510 239 531
1510 289 533
1510 137 986
1510 398 969
1510 323 680
1510 302 569
1510 143 1325
1510 248 694
1510 263 504
1510 242 1294
1515 261 568
1515 109 1329
1515 135 1336
1515 325 1079
1515 27 483
1515 163 1350
1515 463 639
1515 108 1005
1515 381 982
1515 266 1345
1515 223 637
1515 133 1012
1515 227 1318
1515 263 494
1515 105 363
1515 239 531
1515 289 533
1515 453 1041
1515 323 680
1515 302 569
1515 217 677
1520 364 1009
1520 261 483
1520 454 1041
1520 106 1035
1520 116 1346
1520 463 639
1520 191 661
1520 27 483
1520 257 1347
1520 240 531
1520 214 1330
1520 105 363
1520 323 680
1520 263 568
1520 319 1101
1520 222 635
1520 129 1352
1520 302 569
1520 127 1037
1520 289 533
1525 103 1069
1525 261 483
1525 27 483
1525 200 1349
1525 463 639
1525 351 1025
1525 453 1041
1525 105 363
1525 239 531
1525 263 568
1525 304 1118
1525 222 635
1525 165 642
1525 322 680
1525 104 1363
1525 302 569
1525 124 1064
1525 289 531
1530 103 1084
1530 104 363
1530 462 805
1530 264 488
1530 28 483
1530 454 1041
1530 464 640
1530 338 1048
1530 123 1091
1530 292 1142
1530 140 625
1530 242 531
1530 263 568
1530 222 635
1530 321 680
1530 302 569
1530 191 1358
1530 289 531
1535 466 853
1535 439 828
1535 278 1160
1535 101 1110
1535 460 884
1535 28 483
1535 462 640
1535 111 611
1535 322 1076
1535 269 493
1535 105 363
1535 242 531
1535 263 568
1535 222 635
1535 126 1113
1535 321 680
1535 302 569
1535 454 1041
1535 289 531
1540 454 1041
1540 443 873
1540 418 853
1540 28 483
1540 462 640
1540 128 1147
1540 101 1142
1540 442 904
1540 263 1185
1540 269 493
1540 105 363
1540 242 531
1540 263 568
1540 90 596
1540 322 680
1540 302 569
1540 315 1095
1540 221 635
1540 289 531
1545 421 887
1545 302 1121
1545 63 571
1545 28 483
1545 454 1041
1545 423 932
1545 461 625
1545 132 1166
1545 399 875
1545 263 507
1545 105 363
1545 242 531
1545 263 568
1545 252 1205
1545 322 680
1545 302 569
1545 110 1164
1545 221 635
1545 289 531
1550 239 1226
1550 403 912
1550 288 531
1550 455 1041
1550 28 483
1550 112 1193
1550 461 625
1550 43 561
1550 135 1198
1550 380 904
1550 105 363
1550 242 531
1550 409 953
1550 222 635
1550 322 680
1550 302 569
1550 287 1145
1550 264 568
1550 262 507
1555 322 680
1555 104 363
1555 231 1241
1555 454 625
1555 28 483
1555 389 939
1555 266 506
1555 241 531
1555 137 1225
1555 114 1224
1555 398 975
1555 365 935
1555 222 635
1555 22 542
1555 301 569
1555 456 1046
1555 288 531
1555 274 1169
1555 264 568
1560 104 363
1560 300 569
1560 456 1042
1560 262 1197
1560 390 995
1560 266 506
1560 373 968
1560 240 531
1560 112 1258
1560 349 962
1560 218 1263
1560 222 635
1560 136 1260
1560 322 680
1560 288 531
1560 448 628
1560 264 568
1560 33 487
1565 322 680
1565 360 990
1565 102 363
1565 456 1042
1565 372 1015
1565 222 635
1565 287 531
1565 209 1268
1565 449 629
1565 239 531
1565 334 983
1565 140 1294
1565 266 506
1565 447 715
1565 117 1275
1565 33 487
1565 264 568
1565 256 1220
1565 300 569
1570 139 1322
1570 29 481
1570 362 1046
1570 300 569
1570 249 1240
1570 287 531
1570 402 703
1570 450 629
1570 120 1308
1570 105 363
1570 326 1007
1570 223 635
1570 266 506
1570 322 680
1570 197 1302
1570 241 531
1570 455 1042
1570 264 568
1570 346 1018
1575 351 1064
1575 300 569
1575 265 568
1575 307 1042
1575 191 1320
1575 376 688
1575 287 531
1575 241 531
1575 222 636
1575 105 363
1575 452 635
1575 30 481
1575 266 506
1575 140 1342
1575 322 680
1575 333 1049
1575 118 1334
1575 240 1255
1575 455 1042
1580 233 1299
1580 300 569
1580 297 1064
1580 339 1090
1580 287 531
1580 241 531
1580 222 636
1580 182 1330
1580 105 363
1580 359 676
1580 266 506
1580 322 680
1580 318 1074
1580 455 1042
1580 29 463
1580 264 568
1580 451 635
1585 176 1356
1585 282 1095
1585 351 664
1585 307 1101
1585 325 1117
1585 18 452
1585 287 531
1585 241 531
1585 222 636
1585 105 363
1585 230 1322
1585 450 635
1585 266 506
1585 299 569
1585 322 680
1585 264 568
1585 455 1042
1590 351 664
1590 449 630
1590 314 1138
1590 287 531
1590 241 531
1590 222 636
1590 105 363
1590 220 1345
1590 266 506
1590 299 569
1590 322 680
1590 267 1122
1590 264 568
1590 295 1125
1590 455 1042
1595 342 661
1595 305 1162
1595 448 630
1595 287 531
1595 241 531
1595 222 636
1595 105 363
1595 284 1150
1595 253 1146
1595 266 506
1595 299 569
1595 263 569
1595 452 1047
1595 322 680
1600 271 1177
1600 266 496
1600 292 1190
1600 287 531
1600 241 531
1600 222 636
1600 452 1047
1600 447 630
1600 324 674
1600 299 569
1600 263 569
1600 337 657
1600 106 363
1600 246 1174
1605 239 533
1605 105 356
1605 449 630
1605 279 1215
1605 343 660
1605 287 531
1605 222 636
1605 452 1047
1605 260 1205
1605 324 674
1605 299 569
1605 263 569
1605 234 1199
1605 266 486
1605 479 693
1610 239 533
1610 246 1225
1610 449 630
1610 266 480
1610 343 660
1610 287 531
1610 222 636
1610 452 1045
1610 101 347
1610 223 1228
1610 324 674
1610 299 569
1610 263 569
1610 268 1239
1610 474 685
1615 239 533
1615 319 674
1615 479 643
1615 234 1265
1615 253 1257
1615 211 1251
1615 90 344
1615 222 636
1615 452 1045
1615 450 628
1615 462 678
1615 287 531
1615 343 660
1615 299 569
1615 263 569
1615 259 477
1620 239 533
1620 222 636
1620 451 1045
1620 197 1273
1620 255 476
1620 479 642
1620 319 674
1620 241 1290
1620 291 1277
1620 451 615
1620 78 337
1620 287 531
1620 447 668
1620 343 660
1620 299 569
1620 263 569
1620 222 1285
1625 239 533
1625 319 674
1625 451 1045
1625 478 641
1625 68 332
1625 207 1312
1625 284 1257
1625 287 531
1625 234 1318
1625 222 636
1625 184 1310
1625 258 487
1625 299 569
1625 447 659
1625 344 667
1625 458 606
1625 263 569
1630 239 533
1630 319 674
1630 478 640
1630 441 642
1630 220 1334
1630 171 1334
1630 287 531
1630 276 1239
1630 222 636
1630 452 1045
1630 200 1327
1630 351 673
1630 299 569
1630 263 569
1630 56 326
1630 458 606
1630 260 487
1635 319 674
1635 183 1347
1635 45 321
1635 222 637
1635 452 1045
1635 436 632
1635 157 1354
1635 351 685
1635 460 596
1635 476 626
1635 241 533
1635 265 1200
1635 299 569
1635 263 569
1635 210 1364
1635 285 533
1635 260 487
1640 319 674
1640 222 637
1640 257 1170
1640 436 616
1640 461 588
1640 351 686
1640 470 623
1640 32 308
1640 452 1045
1640 241 533
1640 299 569
1640 263 569
1640 285 533
1640 260 487
1645 319 674
1645 347 694
1645 452 1045
1645 247 1146
1645 464 577
1645 222 636
1645 27 310
1645 241 533
1645 464 615
1645 260 489
1645 299 569
1645 263 569
1645 285 533
1645 431 604
1650 222 636
1650 459 611
1650 452 1045
1650 285 533
1650 263 486
1650 471 570
1650 343 696
1650 241 533
1650 314 678
1650 299 569
1650 263 569
1650 235 1119
1650 425 595
1655 314 678
1655 456 599
1655 470 569
1655 263 486
1655 222 636
1655 452 1045
1655 241 533
1655 226 1113
1655 343 697
1655 299 569
1655 263 569
1655 285 533
1655 417 583
1660 455 582
1660 263 486
1660 222 636
1660 452 1045
1660 241 533
1660 339 698
1660 214 1070
1660 263 569
1660 299 569
1660 310 676
1660 476 552
1660 409 573
1660 285 533
1665 263 475
1665 310 676
1665 449 564
1665 206 1048
1665 402 549
1665 222 636
1665 452 1045
1665 241 533
1665 477 530
1665 299 569
1665 263 569
1665 285 533
1665 329 704
1670 310 676
1670 198 1031
1670 474 525
1670 400 530
1670 324 703
1670 222 636
1670 452 1045
1670 241 533
1670 283 533
1670 299 569
1670 263 569
1670 259 477
1670 443 545
1675 320 703
1675 310 676
1675 283 533
1675 222 636
1675 452 1045
1675 241 533
1675 467 503
1675 400 518
1675 299 569
1675 263 569
1675 259 477
1675 436 530
1675 192 993
1680 430 511
1680 184 967
1680 218 627
1680 456 483
1680 452 1045
1680 241 533
1680 308 670
1680 283 533
1680 312 702
1680 299 569
1680 263 569
1680 259 477
1680 396 495
1680 355 1210
1685 390 474
1685 452 1045
1685 218 627
1685 309 705
1685 350 1191
1685 307 670
1685 240 533
1685 283 533
1685 423 494
1685 452 464
1685 299 569
1685 263 569
1685 259 477
1685 176 938
1690 171 918
1690 342 1147
1690 380 457
1690 218 627
1690 418 465
1690 240 533
1690 283 533
1690 442 435
1690 315 662
1690 309 705
1690 299 569
1690 263 569
1690 259 477
1690 452 1045
1695 239 533
1695 451 1045
1695 430 414
1695 374 436
1695 161 897
1695 218 627
1695 312 659
1695 411 450
1695 257 477
1695 283 533
1695 337 1131
1695 299 569
1695 263 569
1695 301 701
1700 151 874
1700 451 1045
1700 257 477
1700 420 385
1700 218 627
1700 235 533
1700 312 656
1700 403 430
1700 366 415
1700 283 533
1700 330 1102
1700 299 569
1700 263 569
1700 301 701
1705 257 477
1705 142 846
1705 218 627
1705 235 533
1705 312 656
1705 396 408
1705 357 402
1705 408 365
1705 445 1045
1705 283 533
1705 299 569
1705 263 569
1705 302 694
1705 325 1075
1710 235 533
1710 479 719
1710 218 627
1710 347 388
1710 312 656
1710 319 1054
1710 133 820
1710 384 385
1710 283 533
1710 400 350
1710 256 476
1710 299 569
1710 263 569
1710 439 1036
1710 466 875
1710 298 687
1715 232 533
1715 293 683
1715 474 719
1715 218 627
1715 313 651
1715 376 369
1715 133 812
1715 446 901
1715 284 533
1715 389 328
1715 299 569
1715 263 569
1715 438 1028
1715 339 370
1715 257 476
1715 312 1035
1720 306 1015
1720 293 683
1720 318 648
1720 218 627
1720 464 727
1720 133 812
1720 426 927
1720 380 308
1720 333 353
1720 440 1019
1720 231 532
1720 284 533
1720 263 488
1720 299 569
1720 263 569
1720 371 351
1725 324 645
1725 303 989
1725 218 627
1725 457 728
1725 264 493
1725 133 812
1725 436 1008
1725 408 950
1725 328 332
1725 233 532
1725 284 533
1725 299 569
1725 263 569
1725 371 288
1725 294 676
1725 360 331
1730 365 270
1730 354 308
1730 300 569
1730 434 990
1730 479 872
1730 260 493
1730 132 812
1730 326 639
1730 294 965
1730 218 627
1730 240 535
1730 283 533
1730 457 727
1730 263 569
1730 320 315
1730 296 666
1730 390 971
1735 283 948
1735 300 569
1735 241 534
1735 371 992
1735 329 633
1735 260 502
1735 343 290
1735 311 297
1735 303 660
1735 427 968
1735 217 627
1735 355 251
1735 457 727
1735 263 569
1735 451 887
1735 124 811
1735 285 533
1740 300 569
1740 312 653
1740 241 534
1740 343 231
1740 457 727
1740 353 1016
1740 260 502
1740 301 280
1740 285 528
1740 116 804
1740 274 931
1740 424 960
1740 217 627
1740 262 569
1740 336 270
1740 426 908
1740 336 629
1745 288 525
1745 338 630
1745 405 925
1745 241 534
1745 326 252
1745 457 727
1745 333 215
1745 111 777
1745 260 502
1745 264 913
1745 301 570
1745 217 627
1745 262 569
1745 297 259
1745 319 645
1745 335 1041
1745 418 952
1750 243 890
1750 288 525
1750 383 944
1750 289 236
1750 325 197
1750 322 1064
1750 320 639
1750 260 502
1750 105 754
1750 342 630
1750 418 939
1750 240 534
1750 217 627
1750 262 569
1750 320 234
1750 450 728
1750 299 570
1755 411 930
1755 288 525
1755 313 217
1755 97 732
1755 299 570
1755 262 569
1755 470 868
1755 373 968
1755 338 630
1755 312 637
1755 217 885
1755 285 223
1755 478 731
1755 217 627
1755 240 534
1755 310 174
1755 442 733
1755 260 502
1755 479 588
1755 307 1088
1760 449 893
1760 358 990
1760 93 714
1760 302 639
1760 189 885
1760 327 632
1760 429 740
1760 299 570
1760 279 206
1760 478 767
1760 309 156
1760 260 502
1760 295 1115
1760 405 907
1760 240 534
1760 217 627
1760 262 569
1760 293 522
1760 466 589
1760 466 745
1760 310 200
1765 86 693
1765 296 642
1765 458 755
1765 161 897
1765 306 136
1765 413 740
1765 323 644
1765 281 1142
1765 431 922
1765 273 192
1765 260 502
1765 311 183
1765 399 892
1765 217 627
1765 240 534
1765 293 522
1765 463 582
1765 263 569
1765 466 776
1765 348 1021
1765 298 570
1770 452 779
1770 462 579
1770 309 120
1770 290 521
1770 300 570
1770 401 750
1770 321 649
1770 441 762
1770 300 156
1770 260 502
1770 345 1048
1770 133 897
1770 217 627
1770 298 637
1770 240 534
1770 411 948
1770 263 569
1770 86 669
1770 268 1166
1770 268 177
1770 394 873
1775 317 649
1775 439 789
1775 391 978
1775 298 637
1775 300 570
1775 301 104
1775 254 1193
1775 390 854
1775 240 534
1775 457 579
1775 260 502
1775 86 635
1775 262 155
1775 337 1077
1775 385 755
1775 217 627
1775 262 569
1775 295 135
1775 103 898
1775 287 521
1775 433 771
1780 80 898
1780 454 581
1780 257 135
1780 316 651
1780 299 570
1780 262 569
1780 241 1220
1780 371 1001
1780 87 610
1780 294 118
1780 296 87
1780 328 1105
1780 284 528
1780 217 627
1780 240 534
1780 294 643
1780 384 844
1780 260 502
1780 430 799
1780 422 778
1780 370 766
1785 85 582
1785 63 898
1785 290 102
1785 286 651
1785 416 787
1785 299 570
1785 314 656
1785 294 62
1785 262 569
1785 360 775
1785 228 1236
1785 381 826
1785 419 810
1785 250 116
1785 283 528
1785 451 581
1785 217 627
1785 240 534
1785 259 502
1785 469 806
1785 349 1025
1785 318 1127
1790 259 502
1790 214 1260
1790 305 1156
1790 47 898
1790 454 816
1790 409 799
1790 417 819
1790 309 658
1790 299 570
1790 262 569
1790 345 786
1790 285 528
1790 84 548
1790 284 83
1790 325 1055
1790 217 627
1790 240 534
1790 284 657
1790 243 98
1790 450 590
1790 374 804
1795 447 590
1795 200 1290
1795 81 519
1795 300 570
1795 447 819
1795 305 665
1795 479 639
1795 239 77
1795 278 666
1795 285 528
1795 262 569
1795 368 782
1795 303 1084
1795 217 627
1795 240 534
1795 259 502
1795 401 810
1795 407 827
1795 37 898
1795 295 1183
1795 331 800
1800 399 833
1800 290 530
1800 314 663
1800 290 1110
1800 265 499
1800 302 569
1800 476 634
1800 76 488
1800 261 570
1800 244 530
1800 220 627
1800 12 369
1800 370 765
1800 275 670
1800 316 810
1800 440 834
1800 442 605
1805 266 1146
1805 289 528
1805 302 569
1805 265 499
1805 81 458
1805 477 445
1805 242 531
1805 301 822
1805 261 570
1805 13 368
1805 220 627
1805 465 623
1805 429 831
1805 281 664
1805 430 611
1805 314 665
1805 397 832
1805 370 744
1810 303 567
1810 460 428
1810 360 722
1810 256 1169
1810 264 497
1810 289 530
1810 465 630
1810 297 842
1810 394 844
1810 422 839
1810 242 531
1810 281 664
1810 261 570
1810 425 624
1810 220 627
1810 475 521
1810 14 367
1810 79 436
1810 314 665
1810 365 832
1815 450 517
1815 303 567
1815 309 665
1815 358 697
1815 459 630
1815 264 497
1815 242 1201
1815 422 839
1815 359 838
1815 242 531
1815 281 664
1815 261 570
1815 82 424
1815 285 852
1815 220 627
1815 14 367
1815 387 844
1815 421 630
1815 288 531
1815 443 409
1820 303 567
1820 455 630
1820 309 665
1820 222 1235
1820 422 839
1820 427 511
1820 274 852
1820 355 678
1820 425 385
1820 384 851
1820 281 664
1820 261 570
1820 220 627
1820 415 642
1820 14 367
1820 86 424
1820 242 533
1820 360 839
1820 288 531
1820 266 497
1825 14 367
1825 287 530
1825 408 646
1825 309 665
1825 303 567
1825 357 844
1825 358 660
1825 384 852
1825 420 839
1825 446 630
1825 281 664
1825 406 512
1825 261 570
1825 92 424
1825 220 627
1825 410 361
1825 240 533
1825 277 853
1825 266 497
1830 303 567
1830 384 852
1830 391 512
1830 406 647
1830 437 631
1830 282 527
1830 352 646
1830 420 832
1830 282 664
1830 291 867
1830 261 570
1830 393 339
1830 220 627
1830 14 367
1830 264 499
1830 310 668
1830 353 842
1830 91 434
1830 241 533
1835 303 567
1835 275 531
1835 87 442
1835 310 668
1835 436 643
1835 302 868
1835 399 645
1835 220 627
1835 381 312
1835 261 570
1835 282 664
1835 261 499
1835 352 840
1835 382 851
1835 16 366
1835 382 502
1835 359 631
1835 410 831
1835 241 533
1840 359 615
1840 426 644
1840 322 871
1840 366 289
1840 381 852
1840 360 829
1840 310 668
1840 367 498
1840 261 570
1840 261 499
1840 82 453
1840 282 664
1840 397 664
1840 220 627
1840 240 533
1840 16 366
1840 304 567
1840 410 831
1840 279 531
1845 419 655
1845 408 826
1845 393 664
1845 381 852
1845 360 829
1845 310 668
1845 365 598
1845 355 259
1845 261 570
1845 282 664
1845 261 499
1845 333 864
1845 240 533
1845 77 459
1845 286 530
1845 304 567
1845 361 498
1845 16 366
1845 220 627
1850 340 236
1850 79 460
1850 281 668
1850 217 625
1850 409 668
1850 404 820
1850 298 571
1850 349 825
1850 259 502
1850 261 570
1850 306 664
1850 289 527
1850 383 670
1850 368 585
1850 347 490
1850 340 858
1850 244 532
1850 386 856
1855 344 494
1855 280 664
1855 398 683
1855 302 566
1855 355 828
1855 406 822
1855 242 535
1855 219 625
1855 260 571
1855 290 526
1855 342 853
1855 327 205
1855 259 501
1855 79 454
1855 387 857
1855 374 678
1855 368 572
1855 305 664
1860 300 568
1860 317 180
1860 351 824
1860 366 689
1860 290 528
1860 219 625
1860 385 860
1860 267 569
1860 279 665
1860 344 856
1860 379 556
1860 238 537
1860 342 499
1860 307 664
1860 76 460
1860 259 499
1860 406 825
1860 390 703
1865 344 851
1865 380 718
1865 300 568
1865 407 820
1865 357 827
1865 265 498
1865 392 865
1865 267 569
1865 221 625
1865 308 150
1865 243 533
1865 277 666
1865 346 504
1865 307 669
1865 465 516
1865 348 705
1865 379 543
1865 76 468
1865 291 529
1870 345 854
1870 75 488
1870 386 863
1870 304 123
1870 300 570
1870 275 495
1870 455 514
1870 356 827
1870 278 666
1870 405 821
1870 241 537
1870 221 624
1870 341 717
1870 264 570
1870 351 508
1870 287 529
1870 377 535
1870 306 669
1870 364 732
1875 287 530
1875 390 869
1875 405 821
1875 275 494
1875 221 627
1875 278 664
1875 476 454
1875 244 536
1875 291 64
1875 308 669
1875 70 510
1875 379 522
1875 442 510
1875 352 853
1875 356 828
1875 353 748
1875 263 572
1875 330 722
1875 350 510
1875 299 570
1880 354 827
1880 378 507
1880 355 854
1880 219 627
1880 465 434
1880 275 494
1880 288 530
1880 346 516
1880 240 534
1880 433 503
1880 305 669
1880 291 80
1880 386 863
1880 70 534
1880 407 822
1880 312 732
1880 263 572
1880 335 753
1880 278 666
1880 298 570
1885 263 573
1885 217 627
1885 280 663
1885 408 821
1885 294 733
1885 377 496
1885 262 495
1885 288 530
1885 307 668
1885 388 861
1885 242 535
1885 354 855
1885 345 517
1885 421 500
1885 298 570
1885 356 827
1885 307 763
1885 70 561
1885 460 421
1890 406 503
1890 217 627
1890 450 410
1890 369 490
1890 240 531
1890 270 726
1890 262 571
1890 282 757
1890 288 530
1890 357 859
1890 310 668
1890 343 518
1890 465 466
1890 69 586
1890 298 570
1890 255 495
1890 410 824
1890 388 866
1890 354 828
1890 278 661
1895 451 457
1895 445 399
1895 219 627
1895 394 497
1895 262 571
1895 249 710
1895 288 529
1895 68 619
1895 357 852
1895 345 522
1895 258 497
1895 298 570
1895 388 860
1895 360 479
1895 245 532
1895 409 824
1895 256 750
1895 278 665
1895 306 669
1895 354 828
1900 65 647
1900 93 763
1900 350 468
1900 266 569
1900 233 694
1900 384 490
1900 287 526
1900 261 503
1900 299 570
1900 231 733
1900 219 628
1900 241 533
1900 278 662
1900 63 771
1900 465 835
1900 437 389
1900 385 859
1900 442 448
1900 355 853
1900 309 669
1900 346 522
1900 358 830
1900 407 831
1905 242 532
1905 64 673
1905 264 502
1905 433 441
1905 342 462
1905 267 571
1905 65 755
1905 287 526
1905 475 862
1905 301 567
1905 26 245
1905 384 863
1905 221 630
1905 357 826
1905 407 826
1905 369 482
1905 214 674
1905 98 741
1905 355 850
1905 356 521
1905 281 663
1905 427 376
1905 307 669
1905 447 854
1905 462 731
1905 209 714
1910 220 628
1910 29 244
1910 191 689
1910 304 672
1910 422 418
1910 459 883
1910 73 727
1910 420 372
1910 440 734
1910 52 696
1910 382 861
1910 405 818
1910 278 662
1910 268 502
1910 359 822
1910 326 452
1910 356 481
1910 200 654
1910 290 526
1910 296 570
1910 356 851
1910 103 715
1910 434 869
1910 367 532
1915 268 568
1915 355 852
1915 411 359
1915 356 826
1915 403 822
1915 188 632
1915 39 724
1915 422 886
1915 475 711
1915 379 863
1915 314 438
1915 278 665
1915 218 628
1915 301 568
1915 387 536
1915 339 475
1915 469 454
1915 105 694
1915 444 901
1915 33 246
1915 80 704
1915 305 669
1915 265 499
1915 287 527
1915 414 407
1915 416 729
1915 174 662
1915 244 538
1920 281 665
1920 32 737
1920 269 570
1920 299 440
1920 158 638
1920 356 826
1920 298 569
1920 104 677
1920 265 504
1920 221 627
1920 409 904
1920 404 826
1920 81 682
1920 427 916
1920 403 344
1920 405 381
1920 307 668
1920 322 471
1920 450 711
1920 179 606
1920 389 737
1920 353 853
1920 240 534
1920 377 864
1920 397 546
1920 287 527
1920 42 257
1920 451 419
1925 429 716
1925 43 255
1925 408 823
1925 280 664
1925 104 651
1925 265 504
1925 355 824
1925 299 571
1925 304 466
1925 171 578
1925 379 863
1925 283 433
1925 439 388
1925 415 938
1925 218 628
1925 267 568
1925 355 849
1925 79 663
1925 144 607
1925 407 556
1925 393 366
1925 479 404
1925 305 669
1925 242 533
1925 365 734
1925 402 335
1925 393 930
1930 103 630
1930 267 569
1930 355 822
1930 136 578
1930 404 719
1930 14 365
1930 380 865
1930 280 531
1930 357 852
1930 299 570
1930 477 340
1930 240 533
1930 430 367
1930 219 628
1930 397 309
1930 385 941
1930 384 335
1930 76 638
1930 403 821
1930 166 552
1930 337 738
1930 264 502
1930 279 665
1930 459 372
1930 400 956
1930 262 435
1930 48 259
1930 293 468
1930 415 561
1930 301 669
1935 472 843
1935 394 291
1935 422 570
1935 129 544
1935 312 742
1935 401 823
1935 267 570
1935 250 433
1935 242 535
1935 368 962
1935 467 312
1935 359 854
1935 299 570
1935 157 522
1935 307 675
1935 266 503
1935 218 628
1935 45 256
1935 102 602
1935 75 612
1935 378 860
1935 278 468
1935 353 827
1935 285 527
1935 389 978
1935 449 347
1935 379 320
1935 380 727
1935 282 666
1935 426 338
1940 149 495
1940 70 594
1940 425 572
1940 264 502
1940 99 580
1940 373 996
1940 473 883
1940 352 733
1940 299 570
1940 352 826
1940 243 535
1940 359 856
1940 268 466
1940 381 859
1940 358 987
1940 218 628
1940 391 275
1940 283 743
1940 307 677
1940 125 521
1940 369 293
1940 458 872
1940 405 821
1940 466 288
1940 444 325
1940 234 431
1940 48 261
1940 279 666
1940 284 531
1940 425 311
1945 404 824
1945 365 273
1945 48 258
1945 460 910
1945 144 466
1945 307 672
1945 261 507
1945 96 563
1945 287 530
1945 299 570
1945 242 534
1945 441 297
1945 357 855
1945 443 891
1945 260 747
1945 281 663
1945 218 628
1945 423 575
1945 270 562
1945 341 1006
1945 327 732
1945 217 431
1945 354 829
1945 379 868
1945 421 293
1945 458 261
1945 72 572
1945 255 462
1945 387 255
1945 356 1014
1945 118 487
1950 286 531
1950 217 627
1950 427 918
1950 469 567
1950 302 729
1950 411 269
1950 307 665
1950 303 568
1950 112 462
1950 403 817
1950 440 269
1950 375 867
1950 265 502
1950 361 257
1950 241 534
1950 351 822
1950 455 891
1950 265 570
1950 381 231
1950 198 435
1950 351 856
1950 342 1038
1950 239 469
1950 235 746
1950 329 1026
1950 46 261
1950 95 538
1950 421 577
1950 133 439
1950 281 665
1950 446 934
1950 68 555
1955 373 210
1955 217 627
1955 265 502
1955 353 234
1955 271 726
1955 307 665
1955 312 1049
1955 447 567
1955 386 266
1955 351 822
1955 90 516
1955 421 572
1955 437 962
1955 66 532
1955 288 528
1955 241 534
1955 439 244
1955 102 433
1955 228 472
1955 178 443
1955 265 570
1955 128 414
1955 209 747
1955 46 261
1955 403 819
1955 333 1055
1955 303 568
1955 354 856
1955 281 665
1955 441 910
1955 411 926
1960 281 665
1960 217 627
1960 419 987
1960 396 215
1960 307 665
1960 351 822
1960 164 443
1960 322 1080
1960 431 551
1960 288 528
1960 343 212
1960 297 1068
1960 265 502
1960 66 513
1960 382 866
1960 96 407
1960 364 192
1960 214 475
1960 86 497
1960 265 570
1960 356 856
1960 125 381
1960 432 948
1960 240 534
1960 248 725
1960 46 261
1960 403 819
1960 303 568
1960 432 214
1960 416 565
1960 185 746
1960 401 946
1965 281 665
1965 217 627
1965 309 1097
1965 65 492
1965 225 725
1965 307 665
1965 389 966
1965 351 823
1965 401 821
1965 123 355
1965 360 170
1965 288 528
1965 91 372
1965 265 502
1965 283 1086
1965 205 472
1965 86 478
1965 245 533
1965 265 570
1965 356 856
1965 406 986
1965 160 746
1965 419 544
1965 343 195
1965 148 443
1965 46 261
1965 435 974
1965 303 568
1965 410 549
1965 381 863
1970 115 327
1970 380 867
1970 217 627
1970 357 151
1970 87 456
1970 422 994
1970 202 725
1970 401 821
1970 288 528
1970 265 502
1970 296 1122
1970 280 664
1970 277 1104
1970 265 570
1970 356 856
1970 340 176
1970 351 823
1970 192 479
1970 410 525
1970 46 261
1970 88 339
1970 303 568
1970 136 748
1970 397 1004
1970 136 448
1970 245 534
1970 391 536
1970 305 664
1975 217 627
1975 119 460
1975 178 720
1975 113 293
1975 88 315
1975 87 440
1975 401 821
1975 240 537
1975 414 1024
1975 288 528
1975 284 1137
1975 265 502
1975 396 503
1975 333 151
1975 111 748
1975 280 664
1975 382 856
1975 265 570
1975 356 856
1975 261 1125
1975 351 823
1975 374 518
1975 46 261
1975 303 568
1975 463 862
1975 190 481
1975 305 664
1975 366 1011
1975 63 444
1980 375 484
1980 402 1055
1980 280 664
1980 401 821
1980 269 1161
1980 88 754
1980 217 627
1980 288 528
1980 265 502
1980 384 862
1980 181 480
1980 450 883
1980 265 570
1980 86 280
1980 356 856
1980 360 494
1980 356 1028
1980 374 1050
1980 351 823
1980 117 462
1980 46 261
1980 337 133
1980 303 568
1980 243 1151
1980 305 664
1980 68 425
1980 108 264
1980 146 721
1980 87 419
1985 241 532
1985 471 911
1985 181 480
1985 280 664
1985 353 856
1985 66 754
1985 239 1164
1985 217 627
1985 256 1187
1985 288 528
1985 107 238
1985 265 502
1985 383 859
1985 401 821
1985 394 1086
1985 79 251
1985 265 570
1985 122 723
1985 351 823
1985 306 663
1985 105 462
1985 344 463
1985 87 399
1985 365 449
1985 303 568
1985 71 405
1985 48 261
1985 433 907
1990 217 627
1990 170 483
1990 356 424
1990 306 665
1990 78 478
1990 71 380
1990 458 933
1990 401 821
1990 345 1069
1990 384 860
1990 51 763
1990 288 528
1990 265 502
1990 328 437
1990 92 374
1990 223 1191
1990 280 664
1990 75 228
1990 265 570
1990 384 1099
1990 353 851
1990 351 823
1990 240 534
1990 420 930
1990 99 727
1990 303 568
1990 48 261
1990 100 209
1990 245 1204
1995 217 627
1995 306 665
1995 69 196
1995 303 568
1995 176 479
1995 401 821
1995 263 569
1995 288 528
1995 265 502
1995 404 947
1995 373 1120
1995 320 418
1995 280 664
1995 384 861
1995 207 1212
1995 353 851
1995 230 1228
1995 351 823
1995 76 478
1995 448 953
1995 79 733
1995 345 395
1995 238 539
1995 48 261
1995 92 178
1995 96 351
