# Supplementary material
Source: ML conference proceedings conference paper supplement (https://openaccess.thecvf.com/content/ICCV2021/html/Song_Stacked_Homography_Transformations_ICCV_2021_paper.html)
Supplement: Supplementary file 2 [file Song_Stacked_Homography_Transformations_ICCV_2021_supplemental.zip › code/multiview_detector/evaluation/motchallenge-devkit/test.txt]

1800 308 660
1800 392 824
1800 284 528
1800 300 568
1800 216 624
1800 272 664
1800 260 500
1800 264 568
1800 316 808
1800 368 764
1800 76 488
1800 240 532
1800 444 604
1800 440 824
1800 288 1112
1800 468 632
1800 236 60
1800 288 1200
1800 388 804
1800 412 828
1805 428 608
1805 216 624
1805 300 568
1805 260 500
1805 428 832
1805 308 660
1805 264 568
1805 304 824
1805 284 528
1805 396 828
1805 276 668
1805 76 460
1805 236 532
1805 364 740
1805 268 1144
1805 376 820
1805 272 1224
1810 216 624
1810 260 500
1810 300 568
1810 304 664
1810 360 720
1810 252 1172
1810 284 528
1810 264 568
1810 292 836
1810 420 616
1810 76 432
1810 364 828
1810 236 532
1810 420 836
1810 276 668
1810 464 632
1810 392 840
1810 256 1232
1810 468 524
1810 464 432
1815 216 624
1815 300 568
1815 284 844
1815 420 836
1815 284 528
1815 304 664
1815 360 828
1815 260 500
1815 416 628
1815 384 844
1815 276 668
1815 264 568
1815 356 692
1815 236 1200
1815 236 532
1815 84 420
1815 444 512
1815 244 1248
1815 440 404
1815 464 628
1815 248 1268
1815 360 712
1820 216 624
1820 352 672
1820 260 500
1820 304 664
1820 284 528
1820 300 568
1820 276 664
1820 88 420
1820 424 508
1820 276 852
1820 420 836
1820 412 632
1820 264 568
1820 356 836
1820 236 532
1820 380 848
1820 424 384
1820 452 632
1825 216 624
1825 276 668
1825 352 660
1825 408 640
1825 304 664
1825 260 500
1825 356 840
1825 240 532
1825 400 512
1825 296 568
1825 284 528
1825 92 420
1825 264 568
1825 380 852
1825 416 836
1825 444 636
1825 280 856
1825 408 364
1825 224 1304
1825 212 1276
1830 216 624
1830 404 648
1830 240 532
1830 260 500
1830 352 644
1830 308 664
1830 260 568
1830 288 868
1830 276 664
1830 284 528
1830 352 840
1830 300 568
1830 388 512
1830 380 852
1830 92 428
1830 416 832
1830 436 636
1830 392 340
1835 308 664
1835 304 864
1835 216 624
1835 300 568
1835 260 496
1835 276 664
1835 84 444
1835 240 536
1835 380 852
1835 352 628
1835 264 568
1835 352 828
1835 284 528
1835 372 504
1835 408 832
1835 400 652
1835 428 640
1835 380 312
1835 300 884
1840 216 624
1840 380 852
1840 360 612
1840 264 500
1840 300 568
1840 304 668
1840 80 456
1840 316 868
1840 260 568
1840 240 532
1840 276 664
1840 360 496
1840 288 528
1840 396 652
1840 404 832
1840 368 288
1840 352 824
1840 420 644
1845 216 624
1845 364 596
1845 384 856
1845 264 500
1845 304 668
1845 76 460
1845 284 528
1845 332 860
1845 300 568
1845 392 656
1845 240 532
1845 264 568
1845 352 492
1845 412 648
1845 404 828
1845 276 664
1845 356 260
1845 352 828
1845 300 648
1850 216 624
1850 304 664
1850 364 584
1850 300 568
1850 284 528
1850 264 568
1850 260 500
1850 76 460
1850 404 828
1850 344 492
1850 384 664
1850 276 664
1850 352 824
1850 236 532
1850 408 664
1850 340 848
1850 340 236
1850 388 852
1855 304 664
1855 216 624
1855 300 568
1855 352 824
1855 260 500
1855 284 528
1855 76 456
1855 324 208
1855 264 568
1855 404 828
1855 340 492
1855 388 852
1855 280 664
1855 368 576
1855 240 532
1855 372 676
1855 392 680
1855 340 848
1855 372 556
1860 304 664
1860 260 500
1860 300 568
1860 216 624
1860 76 460
1860 276 664
1860 288 524
1860 372 556
1860 340 496
1860 404 824
1860 240 536
1860 264 568
1860 364 688
1860 388 852
1860 312 180
1860 352 828
1860 340 848
1860 388 692
1860 476 520
1865 376 712
1865 344 504
1865 348 704
1865 300 664
1865 216 624
1865 376 544
1865 404 828
1865 240 532
1865 264 500
1865 276 664
1865 76 468
1865 300 568
1865 468 516
1865 392 848
1865 352 828
1865 264 568
1865 288 528
1865 312 152
1865 344 848
1870 344 504
1870 336 716
1870 364 728
1870 272 496
1870 456 516
1870 404 824
1870 216 624
1870 304 668
1870 276 664
1870 72 488
1870 376 532
1870 352 824
1870 240 532
1870 388 852
1870 300 568
1870 344 852
1870 264 568
1870 288 528
1870 300 116
1875 352 744
1875 444 508
1875 276 664
1875 216 624
1875 348 512
1875 68 512
1875 240 532
1875 304 668
1875 376 520
1875 300 568
1875 288 524
1875 272 496
1875 384 856
1875 328 724
1875 404 824
1875 352 828
1875 264 568
1875 348 848
1875 468 444
1880 272 492
1880 216 624
1880 404 824
1880 344 508
1880 300 564
1880 276 664
1880 432 504
1880 308 736
1880 64 536
1880 240 532
1880 304 668
1880 332 752
1880 380 512
1880 348 848
1880 388 852
1880 264 568
1880 352 828
1880 284 524
1880 468 432
1885 420 500
1885 220 624
1885 372 492
1885 300 568
1885 308 760
1885 280 664
1885 264 496
1885 304 668
1885 404 824
1885 68 560
1885 236 532
1885 264 568
1885 344 512
1885 388 852
1885 284 528
1885 460 420
1885 292 732
1885 356 824
1885 352 848
1885 376 512
1890 216 624
1890 368 484
1890 408 496
1890 404 824
1890 284 528
1890 300 568
1890 256 496
1890 304 660
1890 64 584
1890 280 756
1890 388 852
1890 352 848
1890 276 668
1890 344 516
1890 356 824
1890 240 532
1890 452 408
1890 264 568
1890 268 724
1890 460 472
1895 300 564
1895 64 620
1895 216 624
1895 396 496
1895 240 532
1895 360 480
1895 256 496
1895 304 668
1895 264 568
1895 388 852
1895 288 528
1895 400 832
1895 276 664
1895 76 776
1895 356 828
1895 256 748
1895 444 392
1895 476 820
1895 344 520
1895 352 848
1895 244 708
1895 56 780
1895 464 420
1895 448 456
1900 384 492
1900 220 624
1900 264 500
1900 64 644
1900 404 828
1900 240 532
1900 300 564
1900 352 468
1900 460 832
1900 264 568
1900 304 664
1900 232 732
1900 288 528
1900 432 380
1900 232 696
1900 276 664
1900 352 844
1900 60 768
1900 344 516
1900 388 852
1900 88 764
1900 356 824
1900 436 448
1905 404 824
1905 212 676
1905 264 500
1905 216 624
1905 60 672
1905 304 664
1905 340 460
1905 368 484
1905 240 532
1905 352 836
1905 280 664
1905 300 568
1905 212 708
1905 448 844
1905 284 524
1905 460 732
1905 352 520
1905 388 852
1905 428 436
1905 428 376
1905 268 572
1905 96 748
1905 356 816
1905 64 752
1910 240 532
1910 268 504
1910 284 528
1910 356 828
1910 384 856
1910 424 372
1910 404 820
1910 328 448
1910 304 668
1910 216 624
1910 432 864
1910 460 880
1910 48 700
1910 276 668
1910 352 476
1910 352 848
1910 192 696
1910 300 572
1910 72 732
1910 416 420
1910 368 532
1910 188 676
1910 96 720
1910 200 648
1910 440 732
1910 264 572
1915 412 360
1915 316 440
1915 264 500
1915 288 524
1915 440 900
1915 240 532
1915 216 624
1915 336 472
1915 304 668
1915 424 884
1915 404 824
1915 352 828
1915 280 668
1915 380 860
1915 264 568
1915 172 664
1915 348 848
1915 88 700
1915 300 564
1915 416 408
1915 80 720
1915 36 720
1915 416 736
1915 184 628
1915 380 532
1915 32 248
1915 108 692
1920 264 504
1920 296 436
1920 300 668
1920 320 464
1920 388 732
1920 276 664
1920 100 672
1920 396 544
1920 288 524
1920 80 676
1920 424 920
1920 404 344
1920 216 624
1920 240 532
1920 304 568
1920 380 860
1920 156 632
1920 412 900
1920 452 712
1920 352 820
1920 264 564
1920 36 252
1920 176 604
1920 400 832
1920 456 732
1920 352 844
1920 160 652
1920 408 372
1925 360 736
1925 264 500
1925 300 668
1925 400 336
1925 280 436
1925 216 624
1925 280 664
1925 80 656
1925 240 532
1925 380 860
1925 264 568
1925 408 928
1925 40 256
1925 308 464
1925 404 552
1925 404 824
1925 140 608
1925 100 648
1925 300 564
1925 168 580
1925 428 720
1925 356 824
1925 436 392
1925 288 524
1925 352 844
1930 404 824
1930 388 944
1930 300 568
1930 416 560
1930 164 548
1930 336 740
1930 216 624
1930 304 668
1930 240 536
1930 280 664
1930 264 568
1930 80 636
1930 264 500
1930 268 432
1930 396 312
1930 460 376
1930 136 580
1930 284 528
1930 44 260
1930 100 632
1930 288 464
1930 432 360
1930 380 864
1930 356 828
1930 132 560
1930 400 728
1930 352 848
1930 392 964
1930 16 612
1935 248 432
1935 308 740
1935 372 964
1935 216 624
1935 300 568
1935 424 564
1935 284 524
1935 240 532
1935 308 668
1935 276 664
1935 72 608
1935 260 500
1935 264 568
1935 280 468
1935 428 348
1935 468 848
1935 400 824
1935 392 292
1935 392 972
1935 372 308
1935 128 540
1935 44 260
1935 356 820
1935 448 344
1935 380 856
1935 372 728
1935 156 536
1935 12 588
1935 156 512
1935 104 608
1940 216 624
1940 240 532
1940 276 668
1940 284 524
1940 300 568
1940 232 432
1940 308 668
1940 460 868
1940 360 984
1940 424 568
1940 400 824
1940 284 744
1940 144 492
1940 264 568
1940 264 464
1940 424 320
1940 352 848
1940 264 500
1940 68 592
1940 388 272
1940 352 732
1940 44 260
1940 444 324
1940 356 824
1940 468 288
1940 380 856
1940 380 988
1940 128 512
1940 376 292
1940 468 888
1940 96 584
1945 348 1004
1945 216 624
1945 284 524
1945 300 568
1945 264 568
1945 212 432
1945 256 744
1945 68 568
1945 304 668
1945 240 536
1945 424 568
1945 280 664
1945 252 468
1945 140 464
1945 348 848
1945 400 824
1945 376 860
1945 264 500
1945 444 300
1945 368 276
1945 384 256
1945 352 828
1945 460 256
1945 328 732
1945 444 888
1945 120 484
1945 44 260
1945 416 296
1945 348 264
1945 456 908
1945 468 856
1945 88 564
1945 356 1024
1950 336 1024
1950 216 624
1950 300 568
1950 420 572
1950 284 528
1950 300 664
1950 232 748
1950 264 568
1950 352 824
1950 132 440
1950 240 472
1950 352 848
1950 276 664
1950 264 500
1950 196 440
1950 376 864
1950 240 532
1950 400 824
1950 468 560
1950 356 248
1950 380 232
1950 300 728
1950 344 1044
1950 448 940
1950 112 456
1950 68 552
1950 428 904
1950 44 260
1950 404 248
1950 96 544
1950 440 276
1950 452 228
1950 452 884
1955 264 500
1955 300 568
1955 424 572
1955 276 664
1955 444 556
1955 216 624
1955 284 528
1955 300 664
1955 260 568
1955 128 404
1955 180 436
1955 224 472
1955 356 820
1955 368 208
1955 332 1056
1955 312 1048
1955 72 528
1955 212 744
1955 356 232
1955 384 852
1955 396 828
1955 348 848
1955 92 524
1955 240 532
1955 276 724
1955 404 236
1955 44 264
1955 432 252
1955 100 432
1955 436 928
1955 336 224
1955 432 972
1955 448 208
1960 264 500
1960 316 1080
1960 216 624
1960 300 568
1960 296 1068
1960 288 524
1960 420 564
1960 160 440
1960 212 476
1960 300 664
1960 264 568
1960 428 544
1960 240 532
1960 120 380
1960 92 404
1960 400 828
1960 352 824
1960 348 852
1960 276 664
1960 64 508
1960 180 744
1960 344 208
1960 384 856
1960 44 260
1960 368 180
1960 88 500
1960 248 724
1960 420 968
1960 392 212
1960 432 192
1960 444 560
1965 284 1088
1965 264 500
1965 300 568
1965 216 624
1965 148 444
1965 288 528
1965 300 664
1965 412 548
1965 156 748
1965 280 668
1965 200 480
1965 400 828
1965 240 532
1965 304 1100
1965 352 820
1965 264 568
1965 120 352
1965 220 724
1965 420 188
1965 348 848
1965 404 984
1965 88 480
1965 428 964
1965 380 856
1965 92 372
1965 44 264
1965 360 168
1965 60 496
1965 388 180
1970 264 500
1970 216 624
1970 300 664
1970 288 528
1970 292 1120
1970 192 476
1970 380 856
1970 300 568
1970 280 668
1970 404 520
1970 136 748
1970 132 444
1970 272 1112
1970 400 824
1970 388 536
1970 112 324
1970 88 456
1970 264 564
1970 84 344
1970 348 848
1970 240 532
1970 60 468
1970 44 260
1970 384 160
1970 352 824
1970 196 720
1970 392 1012
1970 420 1004
1970 332 172
1975 260 1132
1975 264 500
1975 216 624
1975 116 456
1975 300 664
1975 300 564
1975 464 860
1975 88 432
1975 288 528
1975 384 852
1975 276 664
1975 352 824
1975 60 444
1975 184 480
1975 376 512
1975 352 848
1975 264 568
1975 108 296
1975 400 824
1975 384 1032
1975 280 1144
1975 168 720
1975 392 496
1975 240 532
1975 88 308
1975 44 260
1975 396 804
1975 84 328
1975 412 1036
1975 108 748
1975 468 880
1980 248 1152
1980 80 416
1980 216 624
1980 284 528
1980 300 568
1980 268 1164
1980 384 852
1980 264 500
1980 280 664
1980 360 484
1980 176 484
1980 300 668
1980 240 532
1980 264 568
1980 112 460
1980 352 844
1980 448 888
1980 84 280
1980 108 268
1980 352 820
1980 400 820
1980 372 1052
1980 380 480
1980 396 800
1980 144 720
1980 64 432
1980 380 1072
1980 404 1040
1980 44 260
1980 84 752
1985 216 624
1985 264 500
1985 232 1168
1985 436 908
1985 264 568
1985 300 664
1985 172 484
1985 276 664
1985 288 524
1985 240 532
1985 352 832
1985 384 852
1985 76 396
1985 300 568
1985 120 724
1985 400 832
1985 256 1184
1985 340 460
1985 104 236
1985 64 756
1985 364 444
1985 84 244
1985 96 392
1985 392 1072
1985 48 260
1985 388 1092
1985 468 912
1985 396 812
1985 96 464
1985 80 264
1985 348 852
1990 216 624
1990 172 484
1990 220 1192
1990 264 500
1990 300 664
1990 76 476
1990 276 664
1990 352 416
1990 240 532
1990 300 568
1990 244 1208
1990 264 568
1990 400 828
1990 284 528
1990 420 928
1990 352 824
1990 384 852
1990 88 372
1990 328 436
1990 72 216
1990 76 236
1990 100 212
1990 68 384
1990 352 848
1990 456 940
1990 380 1096
1990 44 264
1990 396 808
1995 404 948
1995 172 484
1995 264 500
1995 300 668
1995 300 564
1995 216 624
1995 384 852
1995 344 396
1995 400 828
1995 260 564
1995 60 476
1995 352 824
1995 288 528
1995 276 664
1995 80 352
1995 240 532
1995 228 1224
1995 100 348
1995 84 172
1995 440 964
1995 208 1216
1995 316 412
1995 348 844
1995 80 732
1995 44 260
1995 64 180
1995 396 808
1995 64 336
