# Supplementary material
Source: ML conference proceedings conference paper supplement (https://openaccess.thecvf.com/content/ICCV2021/html/Song_Stacked_Homography_Transformations_ICCV_2021_paper.html)
Supplement: Supplementary file 2 [file Song_Stacked_Homography_Transformations_ICCV_2021_supplemental.zip › code/multiview_detector/evaluation/motchallenge-devkit/utils/boxUnion.m]

function union=boxUnion(bboxleft1, bboxright1, bboxbottom1, bboxup1, bboxleft2, bboxright2, bboxbottom2, bboxup2,isect)
% Compute union of two bounding boxes

a1=bboxright1-bboxleft1;
b1=bboxbottom1-bboxup1;
a2=bboxright2-bboxleft2;
b2=bboxbottom2-bboxup2;
union=a1*b1+a2*b2;
if nargin>8
    bisect=isect;
else
    bisect=boxIntersect(bboxleft1, bboxright1, bboxbottom1, bboxup1, bboxleft2, bboxright2, bboxbottom2, bboxup2);
end
union=union-bisect;


end
