# Supplementary material
Source: ML conference proceedings conference paper supplement (https://openaccess.thecvf.com/content/ICCV2021/html/Song_Stacked_Homography_Transformations_ICCV_2021_paper.html)
Supplement: Supplementary file 2 [file Song_Stacked_Homography_Transformations_ICCV_2021_supplemental.zip › code/multiview_detector/evaluation/motchallenge-devkit/utils/camera/distortedToUndistortedSensorCoord.m]

function [Xu Yu]=distortedToUndistortedSensorCoord (Xd, Yd, mKappa1)
% 	/* convert from distorted to undistorted sensor plane coordinates */
	distortion_factor = 1 + mKappa1 * (Xd*Xd + Yd*Yd);
	Xu = Xd * distortion_factor;
	Yu = Yd * distortion_factor;
end
