# Supplementary material
Source: ML conference proceedings conference paper supplement (https://openaccess.thecvf.com/content/ICCV2021/html/Song_Stacked_Homography_Transformations_ICCV_2021_paper.html)
Supplement: Supplementary file 2 [file Song_Stacked_Homography_Transformations_ICCV_2021_supplemental.zip › code/multiview_detector/evaluation/motchallenge-devkit/utils/camera/README.md]

# Camera Utility Files

This folder contains scripts for computing image-to-world and world-to-image projections.

`calib_towncentre.m` is to be used with the AVG-TownCentre sequence.

The rest is for the PETS sequence, which follows the Tsai camera model. parseCameraParameters can be used to read the camera xml file and the two scripts `imageToWorld.m` and `worldToImage.m` contain the projection routines.
