# Supplementary material
Source: ML conference proceedings conference paper supplement (https://openaccess.thecvf.com/content/ICCV2021/html/Song_Stacked_Homography_Transformations_ICCV_2021_paper.html)
Supplement: Supplementary file 2 [file Song_Stacked_Homography_Transformations_ICCV_2021_supplemental.zip › code/multiview_detector/evaluation/motchallenge-devkit/utils/classIDToString.m]

function classString = classIDToString(classID)

labels = getClassLabels;

if classID<1 || classID>length(labels)
    classString='unknown';
else
    classString = char(labels{classID});
end

end
