# Supplementary material
Source: ML conference proceedings conference paper supplement (https://openaccess.thecvf.com/content/ICCV2021/html/Song_Stacked_Homography_Transformations_ICCV_2021_paper.html)
Supplement: Supplementary file 2 [file Song_Stacked_Homography_Transformations_ICCV_2021_supplemental.zip › code/multiview_detector/evaluation/motchallenge-devkit/utils/cleanRequired.m]

function cl=cleanRequired(seqFolder)

cl =~isempty(strfind(seqFolder,'CVPR19')) || ~isempty(strfind(seqFolder,'MOT16')) || ~isempty(strfind(seqFolder,'MOT17'));
