# Supplementary material
Source: ML conference proceedings conference paper supplement (https://openaccess.thecvf.com/content/ICCV2021/html/Song_Stacked_Homography_Transformations_ICCV_2021_paper.html)
Supplement: Supplementary file 2 [file Song_Stacked_Homography_Transformations_ICCV_2021_supplemental.zip › code/multiview_detector/evaluation/motchallenge-devkit/utils/external/dollar/toolbox/detector/bbNms.m]

function bbs = bbNms( bbs, varargin )
% Bounding box (bb) non-maximal suppression (nms).
%
% type=='max': nms of bbs using area of overlap criteria. For each pair of
% bbs, if their overlap, defined by:
%  overlap(bb1,bb2) = area(intersect(bb1,bb2))/area(union(bb1,bb2))
% is greater than overlap, then the bb with the lower score is suppressed.
% In the Pascal critieria two bbs are considered a match if overlap>=.5. If
% ovrDnm='min', the 'union' in the above formula is replaced with 'min'.
%
% type=='maxg': Similar to 'max', except performs the nms in a greedy
% fashion. Bbs are processed in order of decreasing score, and, unlike in
% 'max' nms, once a bb is suppressed it can no longer suppress other bbs.
%
% type='cover': Perform nms by attempting to choose the smallest subset of
% the bbs such that each remaining bb is within overlap of one of the
% chosen bbs. The above reduces to the weighted set cover problem which is
% NP but greedy optimization yields provably good solutions. The score of
% each bb is set to the sum of the scores of the bbs it covers (the max can
% also be used). In practice similar to 'maxg'.
%
% type=='ms': Mean shift nms of bbs with a variable width kernel. radii is
% a 4 element vector (x,y,w,h) that controls the amount of suppression
% along each dim. Typically the first two elements should be the same, as
% should the last two. Distance between w/h are computed in log2 space (ie
% w and w*2 are 1 unit apart), and the radii should be set accordingly.
% radii may need to change depending on spatial and scale stride of bbs.
%
% Although efficient, nms is O(n^2). To speed things up for large n, can
% divide data into two parts (according to x or y coordinate), run nms on
% each part, combine and run nms on the result. If maxn is specified, will
% split the data in half if n>maxn. Note that this is a heuristic and can
% change the results of nms. Moreover, setting maxn too small will cause an
% increase in overall performance time.
%
% Finally, the bbs are optionally resized before performing nms. The
% resizing is important as some detectors return bbs that are padded. For
% example, if a detector returns a bounding box of size 128x64 around
% objects of size 100x43 (as is typical for some pedestrian detectors on
% the INRIA pedestrian database), the resize parameters should be {100/128,
% 43/64, 0}, see bbApply>resize() for more info.
%
% USAGE
%  bbs = bbNms( bbs, [varargin] )
%
% INPUTS
%  bbs        - original bbs (must be of form [x y w h wt bbType])
%  varargin   - additional params (struct or name/value pairs)
%   .type       - ['max'] 'max', 'maxg', 'ms', 'cover', or 'none'
%   .thr        - [-inf] threshold below which to discard (0 for 'ms')
%   .maxn       - [inf] if n>maxn split and run recursively (see above)
%   .radii      - [.15 .15 1 1] supression radii ('ms' only, see above)
%   .overlap    - [.5] area of overlap for bbs
%   .ovrDnm     - ['union'] area of overlap denominator ('union' or 'min')
%   .resize     - {} parameters for bbApply('resize')
%   .separate   - [0] run nms separately on each bb type (bbType)
%
% OUTPUTS
%  bbs      - suppressed bbs
%
% EXAMPLE
%  bbs=[0 0 1 1 1; .1 .1 1 1 1.1; 2 2 1 1 1];
%  bbs1 = bbNms(bbs, 'type','max' )
%  bbs2 = bbNms(bbs, 'thr',.5, 'type','ms')
%
% See also bbApply, nonMaxSuprList
%
% Piotr's Image&Video Toolbox      Version 2.60
% Copyright 2012 Piotr Dollar.  [pdollar-at-caltech.edu]
% Please email me if you find bugs, or have suggestions or questions!
% Licensed under the Simplified BSD License [see external/bsd.txt]

% get parameters
dfs={'type','max','thr',[],'maxn',inf,'radii',[.15 .15 1 1],...
  'overlap',.5,'ovrDnm','union','resize',{},'separate',0};
[type,thr,maxn,radii,overlap,ovrDnm,resize,separate] = ...
  getPrmDflt(varargin,dfs,1);
if(isempty(thr)), if(strcmp(type,'ms')), thr=0; else thr=-inf; end; end
if(strcmp(ovrDnm,'union')), ovrDnm=1; elseif(strcmp(ovrDnm,'min')),
  ovrDnm=0; else assert(false); end
assert(maxn>=2); assert(numel(overlap)==1);

% discard bbs below threshold and run nms1
if(isempty(bbs)), bbs=zeros(0,5); end; if(strcmp(type,'none')), return; end
kp=bbs(:,5)>thr; bbs=bbs(kp,:); if(isempty(bbs)), return; end
if(~isempty(resize)), bbs=bbApply('resize',bbs,resize{:}); end
pNms1={type,thr,maxn,radii,overlap,0};
if(~separate || size(bbs,2)<6), bbs=nms1(bbs,pNms1{:}); else
  ts=unique(bbs(:,6)); m=length(ts); bbs1=cell(1,m);
  for t=1:m, bbs1{t}=nms1(bbs(bbs(:,6)==ts(t),:),pNms1{:}); end
  bbs=cat(1,bbs1{:});
end

  function bbs = nms1( bbs, type, thr, maxn, radii, overlap, isy )
    % if big split in two, recurse, merge, then run on merged
    if( size(bbs,1)>maxn )
      n2=floor(size(bbs,1)/2); [~,ord]=sort(bbs(:,1+isy)+bbs(:,3+isy)/2);
      bbs0=nms1(bbs(ord(1:n2),:),type,thr,maxn,radii,overlap,~isy);
      bbs1=nms1(bbs(ord(n2+1:end),:),type,thr,maxn,radii,overlap,~isy);
      bbs=[bbs0; bbs1];
    end
    % run actual nms on given bbs
    switch type
      case 'max', bbs = nmsMax(bbs,overlap,0,ovrDnm);
      case 'maxg', bbs = nmsMax(bbs,overlap,1,ovrDnm);
      case 'ms', bbs = nmsMs(bbs,thr,radii);
      case 'cover', bbs = nmsCover(bbs,overlap,ovrDnm);
      otherwise, error('unknown type: %s',type);
    end
  end

  function bbs = nmsMax( bbs, overlap, greedy, ovrDnm )
    % for each i suppress all j st j>i and area-overlap>overlap
    [~,ord]=sort(bbs(:,5),'descend'); bbs=bbs(ord,:);
    n=size(bbs,1); kp=true(1,n); as=bbs(:,3).*bbs(:,4);
    xs=bbs(:,1); xe=bbs(:,1)+bbs(:,3); ys=bbs(:,2); ye=bbs(:,2)+bbs(:,4);
    for i=1:n, if(greedy && ~kp(i)), continue; end
      for j=(i+1):n, if(kp(j)==0), continue; end
        iw=min(xe(i),xe(j))-max(xs(i),xs(j)); if(iw<=0), continue; end
        ih=min(ye(i),ye(j))-max(ys(i),ys(j)); if(ih<=0), continue; end
        o=iw*ih; if(ovrDnm), u=as(i)+as(j)-o; else u=min(as(i),as(j)); end
        o=o/u; if(o>overlap), kp(j)=0; end
      end
    end
    bbs=bbs(kp>0,:);
  end

  function bbs = nmsMs( bbs, thr, radii )
    % position = [x+w/2,y+h/2,log2(w),log2(h)], ws=weights-thr
    ws=bbs(:,5)-thr; w=bbs(:,3); h=bbs(:,4); n=length(w);
    ps=[bbs(:,1)+w/2 bbs(:,2)+h/2 log2(w) log2(h)];
    % find modes starting from each elt, then merge nodes that are same
    ps1=zeros(n,4); ws1=zeros(n,1); stopThr=1e-2;
    for i=1:n, [ps1(i,:), ws1(i,:)]=nmsMs1(i); end
    [ps,ws] = nonMaxSuprList(ps1,ws1,stopThr*100,[],[],2);
    % convert back to bbs format and sort by weight
    w=pow2(ps(:,3)); h=pow2(ps(:,4));
    bbs=[ps(:,1)-w/2 ps(:,2)-h/2 w h ws+thr];
    [ws,ord]=sort(ws,'descend'); bbs=bbs(ord,:);
    
    function [p,w]=nmsMs1(ind)
      % variable bandwith kernel (analytically defined)
      p=ps(ind,:); [n,m]=size(ps); onesN=ones(n,1);
      h = [pow2(ps(:,3)) pow2(ps(:,4)) onesN onesN];
      h = h .* radii(onesN,:); hInv=1./h;
      while(1)
        % compute (weighted) squared Euclidean distance to each neighbor
        d=(ps-p(onesN,:)).*hInv; d=d.*d; d=sum(d,2);
        % compute new mode
        wMask=ws.*exp(-d); wMask=wMask/sum(wMask); p1=wMask'*ps;
        % stopping criteria
        diff=sum(abs(p1-p))/m; p=p1; if(diff<stopThr), break; end
      end
      w = sum(ws.*wMask);
    end
  end

  function bbs = nmsCover( bbs, overlap, ovrDnm )
    % construct n^2 neighbor matrix
    n=size(bbs,1); N=eye(n)*.5; as=bbs(:,3).*bbs(:,4);
    xs=bbs(:,1); xe=bbs(:,1)+bbs(:,3); ys=bbs(:,2); ye=bbs(:,2)+bbs(:,4);
    for i=1:n
      for j=i+1:n
        iw=min(xe(i),xe(j))-max(xs(i),xs(j)); if(iw<=0), continue; end
        ih=min(ye(i),ye(j))-max(ys(i),ys(j)); if(ih<=0), continue; end
        o=iw*ih; if(ovrDnm), u=as(i)+as(j)-o; else u=min(as(i),as(j)); end
        o=o/u; if(o>overlap), N(i,j)=1; end
      end
    end
    % perform set cover operation (greedily choose next best)
    N=N+N'; bbs1=zeros(n,5); n1=n; c=0;
    while( n1>0 ), [~,i0]=max(N*bbs(:,5));
      N0=N(:,i0)==1; n1=n1-sum(N0); N(N0,:)=0; N(:,N0)=0;
      c=c+1; bbs1(c,1:4)=bbs(i0,1:4); bbs1(c,5)=sum(bbs(N0,5));
    end
    bbs=bbs1(1:c,:);
  end
end
