# Supplementary material
Source: ML conference proceedings conference paper supplement (https://openaccess.thecvf.com/content/ICCV2021/html/Song_Stacked_Homography_Transformations_ICCV_2021_paper.html)
Supplement: Supplementary file 2 [file Song_Stacked_Homography_Transformations_ICCV_2021_supplemental.zip › code/multiview_detector/evaluation/motchallenge-devkit/utils/external/dollar/toolbox/detector/writeDets.m]

function writeDets(bbx,outfile)
% write out Dollar's detections to our format

F=length(bbx);

alldets=zeros(0,10);
for t=1:F
    ndets=size(bbx{t},1);    
    dets=[repmat(t,ndets,1) repmat(-1,ndets,1) bbx{t} repmat(-1,ndets,1) repmat(-1,ndets,1) repmat(-1,ndets,1)];
    alldets=[alldets; dets];    
end
dlmwrite(outfile,alldets);

end
