# Supplementary material
Source: ML conference proceedings conference paper supplement (https://openaccess.thecvf.com/content/ICCV2021/html/Song_Stacked_Homography_Transformations_ICCV_2021_paper.html)
Supplement: Supplementary file 2 [file Song_Stacked_Homography_Transformations_ICCV_2021_supplemental.zip › code/multiview_detector/evaluation/motchallenge-devkit/utils/getClassLabels.m]

function labels = getClassLabels()

labels={'ped', ...			% 1
	'person_on_vhcl', ...	% 2
	'car', ...				% 3
	'bicycle', ...			% 4
	'mbike', ...			% 5
	'non_mot_vhcl', ...		% 6
	'static_person', ...	% 7
	'distractor', ...		% 8
	'occluder', ...			% 9
	'occluder_on_grnd', ...		%10
	'occluder_full', ...		% 11
	'reflection', ...		% 12
	'crowd' ...			% 13
	};


end
