# Supplementary material
Source: ML conference proceedings conference paper supplement (https://openaccess.thecvf.com/content/ICCV2021/html/Song_Stacked_Homography_Transformations_ICCV_2021_paper.html)
Supplement: Supplementary file 2 [file Song_Stacked_Homography_Transformations_ICCV_2021_supplemental.zip › code/multiview_detector/evaluation/motchallenge-devkit/utils/getDistance.m]

function dis=getDistance(x1,y1,x2,y2)    
% compute distance for two points
% 

    dis=0;
    
    dis = sqrt((x1 - x2)^2 + (y1 - y2)^2);
    
%     assert(dis<0,'something wrong with union computation');

end
