# Supplementary material
Source: ML conference proceedings conference paper supplement (https://openaccess.thecvf.com/content/ICCV2021/html/Song_Stacked_Homography_Transformations_ICCV_2021_paper.html)
Supplement: Supplementary file 2 [file Song_Stacked_Homography_Transformations_ICCV_2021_supplemental.zip › code/multiview_detector/evaluation/motchallenge-devkit/utils/getROIs.m]

function ROI = getROIs()

ROI{1} = [214 553;1904 411;1897 1055;216 1051];
ROI{2} = [35 423;574 413;624 300;1075 284;1150 341;1153 396;1260 393;1610 492;1608 460;1614 446;1771 440;1777 485;1894 483;1894 1048;29 1051];
ROI{3} = [65 659;926 662;798 592;827 574;1201 573;1500 671;1888 673;1882 1047;68 1044];
ROI{4} = [1189 1043;1664 1043;1434 240;1267 240];
ROI{5} = [28 1054;1897 1054;1893 202;410 211;397 313;311 320;104 369;71 449;107 567;27 750];
ROI{6} = [154 646;957 626;1863 886;1866 1050;40 1059;56 775;103 682];
ROI{7} = [40 751;40 1049;1862 1050;1862 875;862 817;1004 730;667 710;445 779];
ROI{8} = [1867 637;1806 1066;53 1047;455 807;457 729;824 531];
