# Supplementary material
Source: ML conference proceedings conference paper supplement (https://openaccess.thecvf.com/content/ICCV2021/html/Song_Stacked_Homography_Transformations_ICCV_2021_paper.html)
Supplement: Supplementary file 2 [file Song_Stacked_Homography_Transformations_ICCV_2021_supplemental.zip › code/multiview_detector/loss/gaussian_mse.py]

import numpy as np
import torch
from torch import nn
import torch.nn.functional as F


class GaussianMSE(nn.Module):

    def __init__(self):
        super().__init__()

    def forward(self, x, target, kernel):
        target = self._traget_transform(x, target, kernel)
        return F.mse_loss(x, target)

    def _traget_transform(self, x, target, kernel):
        with torch.no_grad():
            target = F.adaptive_max_pool2d(target, x.shape[2:])
            target = F.conv2d(target, kernel.float().to(target.device), padding=int((kernel.shape[-1] - 1) / 2))
        return target
