# Supplementary material
Source: ML conference proceedings conference paper supplement (https://openaccess.thecvf.com/content/ICCV2021/html/Song_Stacked_Homography_Transformations_ICCV_2021_paper.html)
Supplement: Supplementary file 2 [file Song_Stacked_Homography_Transformations_ICCV_2021_supplemental.zip › code/README.md]

# SHOT

Our code is based on [MVDet](https://github.com/hou-yz/MVDet). Please see `README-mvdet.md` for installation and dataset preparation.

# Our code

- `multiview_detector/models/dpersp_trans_detector.py` is the implementation of our method.
- `multiview_detector/models/dpersp_trans_detector_visualize.py` is for visualizing the feature maps in our method.
