# Supplementary material
Source: ML conference proceedings conference paper supplement (https://openaccess.thecvf.com/content/ICCV2021/html/Song_Stacked_Homography_Transformations_ICCV_2021_paper.html)
Supplement: Supplementary file 2 [file Song_Stacked_Homography_Transformations_ICCV_2021_supplemental.zip › code/run_gpu01.sh]

#!/usr/bin/env bash
CUDA_VISIBLE_DEVICES=0,1 python main.py -d wildtrack
